# Supplementary material for: Cap analysis of gene expression reveals alternative promoter usage in a rat model of hypertension
Source: Life Sci Alliance. 2022 Jan 7;5(4):e202101234. doi: 10.26508/lsa.202101234 (PMC8742872; doi:10.26508/lsa.202101234)
Supplement: Supplementary file 1 [file LSA-2021-01234_SdataF1.xlsx]

## Sheet: BNSHR_1tag_3samples_norm_1tpm_1
chr	start	end	strand	tpm	gene	type	prom
chr1	1173468	1173541	+	2.6531	chr1:1173468:1173541:+_P1	.	UN
chr1	1181286	1181369	+	2.15495	Ulbp1_P1	protein_coding	P1
chr1	1671251	1671355	+	14.8328	chr1:1671251:1671355:+_P1	.	UN
chr1	1682367	1682376	+	0.861979	chr1:1682367:1682376:+_P1	.	UN
chr1	1771682	1771768	+	17.3067	Nup43_P1	protein_coding	P1
chr1	1777845	1777939	+	0.917951	Nup43_P2	protein_coding	P2
chr1	1784024	1784083	+	18.8404	Lats1_P1	protein_coding	P1
chr1	1826095	1826236	+	8.64218	Katna1_P1	protein_coding	P1
chr1	1897292	1897373	+	11.7599	Ppil4_P1	protein_coding	P1
chr1	5240157	5240299	+	8.23358	Shprh_P1	protein_coding	P1
chr1	5366062	5366245	+	39.1753	Fbxo30_P1	protein_coding	P1
chr1	5448827	5449003	+	11.5863	Epm2a_P1	protein_coding	P1
chr1	7101669	7101873	+	158.442	Sf3b5_P1	protein_coding	P1
chr1	7219558	7219602	+	1.37133	chr1:7219558:7219602:+_P1	.	UN
chr1	7658866	7659172	+	16.4336	Fuca2_P1	protein_coding	P1
chr1	7665764	7665833	+	2.2557	Fuca2_P2	protein_coding	P2
chr1	7726438	7726519	+	2.00942	Adat2_P1	protein_coding	P1
chr1	8127846	8127970	+	2.12696	chr1:8127846:8127970:+_P1	.	UN
chr1	8128154	8128208	+	3.59904	chr1:8128154:8128208:+_P1	.	UN
chr1	8129034	8129127	+	2.09897	chr1:8129034:8129127:+_P1	.	UN
chr1	10674743	10675058	+	6.39767	chr1:10674743:10675058:+_P1	.	UN
chr1	11904142	11904200	+	0.386211	chr1:11904142:11904200:+_P1	.	UN
chr1	11909084	11909252	+	7.37719	chr1:11909084:11909252:+_P1	.	UN
chr1	11909649	11909807	+	1.31536	chr1:11909649:11909807:+_P1	.	UN
chr1	11912182	11912238	+	0.542935	chr1:11912182:11912238:+_P1	.	UN
chr1	11966630	11966968	+	5.27262	AABR07000398.1_P1	protein_coding	P1
chr1	11971134	11971888	+	528.51	chr1:11971134:11971888:+_P1	.	UN
chr1	11973393	11974287	+	862.751	AABR07000402.1_P1	miRNA	P1
chr1	12006604	12006676	+	1.51126	Mcc_P1	protein_coding	P1
chr1	12823346	12823603	+	67.6989	Cited2_P1	protein_coding	P1
chr1	12824300	12824327	+	0.806006	Cited2_P2	protein_coding	P2
chr1	12915702	12915903	+	167.246	Txlnb_P1	protein_coding	P1
chr1	12919001	12919360	+	5.45733	Txlnb_P2	protein_coding	P2
chr1	12933157	12933310	+	2.0374	Txlnb_P3	protein_coding	P3
chr1	12942092	12942141	+	1.17543	Txlnb_P4	protein_coding	P4
chr1	12954756	12954771	+	0.861979	Txlnb_P5	protein_coding	P5
chr1	13211963	13211992	+	0.71645	Reps1_P1	protein_coding	P1
chr1	13472656	13472741	+	2.40682	chr1:13472656:13472741:+_P1	.	UN
chr1	13476738	13476741	+	0.179112	chr1:13476738:13476741:+_P1	.	UN
chr1	13569305	13569379	+	8.44627	chr1:13569305:13569379:+_P1	.	UN
chr1	13595323	13595468	+	16.8646	Nhsl1_P1	protein_coding	P1
chr1	13661099	13661276	+	5.03754	Nhsl1_P2	protein_coding	P2
chr1	13706477	13706478	+	0.554129	chr1:13706477:13706478:+_P1	.	UN
chr1	14224238	14224698	+	90.2671	Perp_P1	protein_coding	P1
chr1	14233360	14233379	+	0.610102	Perp_P3	protein_coding	P3
chr1	14235700	14235757	+	0.610102	Perp_P2	protein_coding	P2
chr1	15062243	15062531	+	71.1804	Ifngr1_P1	protein_coding	P1
chr1	15074289	15074296	+	1.89188	Ifngr1_P2	protein_coding	P2
chr1	15406971	15407089	+	17.0269	chr1:15406971:15407089:+_P1	.	UN
chr1	15411570	15411722	+	11.3233	Map3k5_P1	protein_coding	P1
chr1	15411907	15412055	+	4.15317	Map3k5_P3	protein_coding	P3
chr1	15412233	15412484	+	5.35658	Map3k5_P2	protein_coding	P2
chr1	15412839	15412938	+	0.822798	Map3k5_P4	protein_coding	P4
chr1	15620622	15620661	+	3.00013	Map7_P1	protein_coding	P1
chr1	15799814	15799911	+	34.0482	Mtfr2_P1	protein_coding	P1
chr1	15810371	15810428	+	0.727644	Mtfr2_P3	protein_coding	P3
chr1	15834745	15834798	+	0.861979	Mtfr2_P2	protein_coding	P2
chr1	16472410	16472643	+	9.0116	chr1:16472410:16472643:+_P1	.	UN
chr1	16819088	16819276	+	102.284	Hbs1l_P1	protein_coding	P1
chr1	18491230	18491467	+	133.215	Lama2_P1	protein_coding	P1
chr1	18492485	18492533	+	0.833992	Lama2_P4	protein_coding	P4
chr1	18644223	18644364	+	2.94976	Lama2_P2	protein_coding	P2
chr1	18655870	18655959	+	0.520546	Lama2_P5	protein_coding	P5
chr1	18971579	18971665	+	2.84901	Lama2_P3	protein_coding	P3
chr1	19998776	19998836	+	1.89188	chr1:19998776:19998836:+_P1	.	UN
chr1	19999752	19999794	+	1.00751	chr1:19999752:19999794:+_P1	.	UN
chr1	20115896	20115974	+	0.867576	LOC100360791_P2	processed_pseudogene	P2
chr1	20116142	20116182	+	1.03549	LOC100360791_P1	processed_pseudogene	P1
chr1	20116324	20116331	+	0.77802	LOC100360791_P3	processed_pseudogene	P3
chr1	20116573	20116610	+	0.750033	chr1:20116573:20116610:+_P1	.	UN
chr1	21129066	21129120	+	13.4222	chr1:21129066:21129120:+_P1	.	UN
chr1	21142189	21142200	+	0.352628	Akap7_P2	protein_coding	P2
chr1	21235844	21235930	+	1.60641	Akap7_P1	protein_coding	P1
chr1	21525427	21525485	+	0.520546	Arg1_P1	protein_coding	P1
chr1	21613121	21613197	+	15.7171	Enpp3_P1	protein_coding	P1
chr1	21748182	21748304	+	17.984	Enpp1_P1	protein_coding	P1
chr1	21854322	21854539	+	3.69419	chr1:21854322:21854539:+_P1	.	UN
chr1	22758177	22758457	+	270.163	Rps12_P1	protein_coding	P1
chr1	22758590	22758651	+	18.9523	Rps12_P2	protein_coding	P2
chr1	22759446	22759534	+	4.38266	Rps12_P3	protein_coding	P3
chr1	22759776	22759806	+	1.0187	Rps12_P4	protein_coding	P4
chr1	23238166	23238565	+	16.4224	chr1:23238166:23238565:+_P1	.	UN
chr1	23906689	23906831	+	20.3908	Tcf21_P1	protein_coding	P1
chr1	23909164	23909176	+	1.61761	Tcf21_P2	protein_coding	P2
chr1	23977578	23977798	+	28.4733	Tbpl1_P1	protein_coding	P1
chr1	24190997	24191062	+	1.45529	chr1:24190997:24191062:+_P1	.	UN
chr1	24737301	24737343	+	3.57105	LOC102546868_P1	lincRNA	P1
chr1	25632893	25633107	+	28.5628	chr1:25632893:25633107:+_P1	.	UN
chr1	25642371	25642379	+	0.565324	chr1:25642371:25642379:+_P1	.	UN
chr1	28454924	28455120	+	15.163	Tpd52l1_P1	protein_coding	P1
chr1	29191047	29191229	+	9.39781	Hey2_P1	protein_coding	P1
chr1	29225474	29225543	+	1.70717	Ncoa7_P2	protein_coding	P2
chr1	29375688	29375850	+	4.21474	Ncoa7_P1	protein_coding	P1
chr1	29413340	29413610	+	32.8503	Hint3_P1	protein_coding	P1
chr1	29432116	29432168	+	3.98525	Trmt11_P1	protein_coding	P1
chr1	29915430	29915517	+	1.8471	Cenpw_P1	protein_coding	P1
chr1	30856927	30857021	+	50.4258	chr1:30856927:30857021:+_P1	.	UN
chr1	30872618	30872629	+	0.53174	Rnf146_P1	protein_coding	P1
chr1	31494043	31494129	+	1.65119	chr1:31494043:31494129:+_P1	.	UN
chr1	31531037	31531456	+	32.8	Lrrc14b_P1	protein_coding	P1
chr1	31531580	31531638	+	1.93665	Lrrc14b_P2	protein_coding	P2
chr1	31545561	31545749	+	1094.32	Sdha_P1	protein_coding	P1
chr1	31550088	31550150	+	3.59344	Sdha_P5	protein_coding	P5
chr1	31551406	31551567	+	5.1103	Sdha_P4	protein_coding	P4
chr1	31555172	31555266	+	22.6465	Sdha_P2	protein_coding	P2
chr1	31560513	31560616	+	5.45733	Sdha_P3	protein_coding	P3
chr1	31576150	31576312	+	66.9713	Pdcd6_P1	protein_coding	P1
chr1	31700905	31700999	+	36.4718	Exoc3_P1	protein_coding	P1
chr1	31967007	31967037	+	1.71836	Trip13_P1	protein_coding	P1
chr1	32058011	32058081	+	3.53747	Nkd2_P1	protein_coding	P1
chr1	32640047	32640123	+	0.621296	chr1:32640047:32640123:+_P1	.	UN
chr1	33276007	33276207	+	2.27249	chr1:33276007:33276207:+_P1	.	UN
chr1	33910885	33910939	+	2.87699	Irx1_P1	protein_coding	P1
chr1	35280456	35280545	+	14.4801	Ice1_P1	protein_coding	P1
chr1	35867975	35867992	+	1.72396	LOC679881_P1	pseudogene	P1
chr1	36185909	36186024	+	19.333	Ube2ql1_P1	protein_coding	P1
chr1	36186810	36186889	+	1.11945	Ube2ql1_P2	protein_coding	P2
chr1	36320433	36320492	+	0.828395	Srd5a1_P1	protein_coding	P1
chr1	36399798	36399958	+	1.44969	Tent4a_P1	protein_coding	P1
chr1	37558965	37559024	+	3.23522	Adcy2_P1	protein_coding	P1
chr1	37559190	37559197	+	0.548532	Adcy2_P2	protein_coding	P2
chr1	37743087	37743168	+	22.5122	Mtrr_P1	protein_coding	P1
chr1	39811365	39812207	+	134.704	Ppp1r14c_P1	protein_coding	P1
chr1	39841647	39842003	+	14.5249	Ppp1r14c_P2	protein_coding	P2
chr1	40286866	40287157	+	17.1332	chr1:40286866:40287157:+_P1	.	UN
chr1	40520412	40520454	+	0.794812	Plekhg1_P1	protein_coding	P1
chr1	40529027	40529088	+	0.912354	Mthfd1l_P1	protein_coding	P1
chr1	40816075	40816140	+	9.10675	Akap12_P2	protein_coding	P2
chr1	40879688	40879834	+	17.9952	Akap12_P1	protein_coding	P1
chr1	40899449	40899518	+	0.744436	Akap12_P3	protein_coding	P3
chr1	40982715	40982962	+	26.671	Armt1_P1	protein_coding	P1
chr1	41192733	41192799	+	0.906757	Esr1_P1	protein_coding	P1
chr1	41654122	41654244	+	6.57119	chr1:41654122:41654244:+_P1	.	UN
chr1	41754602	41754646	+	0.945938	chr1:41754602:41754646:+_P1	.	UN
chr1	42109140	42109145	+	0.414198	chr1:42109140:42109145:+_P1	.	UN
chr1	42121566	42121694	+	47.4592	Myct1_P1	protein_coding	P1
chr1	42130844	42130949	+	1.54484	Myct1_P2	protein_coding	P2
chr1	44018903	44019257	+	30.4155	Scaf8_P1	protein_coding	P1
chr1	45880968	45881278	+	5.51331	chr1:45880968:45881278:+_P1	.	UN
chr1	46378819	46378892	+	2.35085	Zdhhc14_P1	protein_coding	P1
chr1	46779861	46779862	+	0.660477	Snx9_P1	protein_coding	P1
chr1	46835722	46835988	+	13.5734	Synj2_P1	protein_coding	P1
chr1	46883361	46883453	+	2.53556	Synj2_P2	protein_coding	P2
chr1	46978333	46978463	+	131.558	Gtf2h5_P1	protein_coding	P1
chr1	46983598	46983655	+	0.604505	Gtf2h5_P2	protein_coding	P2
chr1	47004250	47004409	+	15.3085	chr1:47004250:47004409:+_P1	.	UN
chr1	47162337	47162429	+	18.902	Tmem181_P1	protein_coding	P1
chr1	47605184	47605397	+	27.8408	Fndc1_P1	protein_coding	P1
chr1	47913800	47913811	+	0.806006	chr1:47913800:47913811:+_P1	.	UN
chr1	47942433	47942534	+	9.12914	Wtap_P2	protein_coding	P2
chr1	47942712	47942911	+	43.6363	Wtap_P1	protein_coding	P1
chr1	47952912	47952950	+	0.906757	Wtap_P3	protein_coding	P3
chr1	47972323	47972397	+	1.77433	Acat2_P1	protein_coding	P1
chr1	48033648	48033863	+	90.7708	Mrpl18_P1	protein_coding	P1
chr1	48034297	48034349	+	0.833992	Mrpl18_P5	protein_coding	P5
chr1	48036242	48036252	+	0.867576	Mrpl18_P4	protein_coding	P4
chr1	48036383	48036466	+	1.13065	Mrpl18_P2	protein_coding	P2
chr1	48038369	48038426	+	1.11945	Mrpl18_P3	protein_coding	P3
chr1	48175989	48176130	+	55.7823	Igf2r_P1	protein_coding	P1
chr1	48207016	48207024	+	0.873173	Igf2r_P3	protein_coding	P3
chr1	48207813	48207866	+	1.88628	Igf2r_P2	protein_coding	P2
chr1	48220380	48220383	+	0.503754	Igf2r_P4	protein_coding	P4
chr1	48295795	48295951	+	4.06921	Slc22a1_P1	protein_coding	P1
chr1	48433336	48433476	+	4.68491	Slc22a3_P1	protein_coding	P1
chr1	48625664	48625731	+	28.1654	Map3k4_P1	protein_coding	P1
chr1	50252061	50252106	+	0.548532	chr1:50252061:50252106:+_P1	.	UN
chr1	50421422	50421485	+	1.29857	chr1:50421422:50421485:+_P1	.	UN
chr1	50827016	50827060	+	0.587713	chr1:50827016:50827060:+_P1	.	UN
chr1	50827531	50827783	+	11.5192	LOC108348175_P2	protein_coding	P2
chr1	50828045	50828240	+	367.645	LOC108348175_P1	protein_coding	P1
chr1	50828472	50828625	+	6.57679	LOC108348175_P3	protein_coding	P3
chr1	53038388	53038442	+	2.84901	chr1:53038388:53038442:+_P1	.	UN
chr1	53174811	53175059	+	76.1732	Rnaset2_P1	protein_coding	P1
chr1	53186120	53186189	+	0.968327	Rnaset2_P2	protein_coding	P2
chr1	53360119	53360250	+	21.3592	Rps6ka2_P1	protein_coding	P1
chr1	53840440	53840475	+	0.766825	chr1:53840440:53840475:+_P1	.	UN
chr1	53923877	53923907	+	2.69228	chr1:53923877:53923907:+_P1	.	UN
chr1	53930139	53930149	+	0.397406	chr1:53930139:53930149:+_P1	.	UN
chr1	56242265	56242358	+	16.7974	Smoc2_P1	protein_coding	P1
chr1	56949688	56949800	+	18.7732	LOC100125364_P1	protein_coding	P1
chr1	56982743	56982860	+	4.88081	Ermard_P1	protein_coding	P1
chr1	57345658	57345931	+	13.7805	Fam120b_P1	protein_coding	P1
chr1	57491371	57491440	+	17.7097	Tbp_P1	protein_coding	P1
chr1	57555216	57555316	+	22.0196	chr1:57555216:57555316:+_P1	.	UN
chr1	57564836	57564869	+	1.46648	chr1:57564836:57564869:+_P1	.	UN
chr1	57690832	57690956	+	15.3869	chr1:57690832:57690956:+_P1	.	UN
chr1	57815602	57815651	+	0.649283	chr1:57815602:57815651:+_P1	.	UN
chr1	59129919	59130015	+	18.499	Riok2_P1	protein_coding	P1
chr1	59701054	59701316	+	4.17556	chr1:59701054:59701316:+_P1	.	UN
chr1	60105781	60105878	+	2.98334	AC091336.1_P1	protein_coding	P1
chr1	60717189	60717431	+	131.877	Ppp2r1a_P1	protein_coding	P1
chr1	60723038	60723075	+	0.90116	Ppp2r1a_P4	protein_coding	P4
chr1	60724691	60724760	+	2.11577	Ppp2r1a_P3	protein_coding	P3
chr1	60725796	60725914	+	3.13447	Ppp2r1a_P2	protein_coding	P2
chr1	60731033	60731036	+	0.464573	Ppp2r1a_P5	protein_coding	P5
chr1	60871783	60871826	+	2.80983	chr1:60871783:60871826:+_P1	.	UN
chr1	61258709	61258775	+	4.53938	chr1:61258709:61258775:+_P1	.	UN
chr1	61313669	61313768	+	2.52437	Zfp54_P1	protein_coding	P1
chr1	61348280	61348372	+	3.69419	chr1:61348280:61348372:+_P1	.	UN
chr1	61403264	61403312	+	0.638088	Zfp52_P1	protein_coding	P1
chr1	61430839	61430924	+	9.44259	chr1:61430839:61430924:+_P1	.	UN
chr1	61487517	61487622	+	1.4329	LOC108348215_P1	protein_coding	P1
chr1	61519888	61519980	+	2.84901	chr1:61519888:61519980:+_P1	.	UN
chr1	61724403	61724501	+	11.5639	chr1:61724403:61724501:+_P1	.	UN
chr1	62134423	62134457	+	0.610102	LOC102555377_P2	protein_coding	P2
chr1	62134592	62134683	+	2.68669	LOC102555377_P1	protein_coding	P1
chr1	63842326	63842378	+	2.12696	Lilrb3l_P1	protein_coding	P1
chr1	64031638	64031898	+	6.5432	Mboat7l1_P1	protein_coding	P1
chr1	64074148	64074211	+	2.32846	Tmc4_P1	protein_coding	P1
chr1	64126845	64127033	+	56.4316	Leng1_P1	protein_coding	P1
chr1	64162524	64162554	+	1.13065	Tfpt_P2	protein_coding	P2
chr1	64162814	64162868	+	8.07126	Tfpt_P1	protein_coding	P1
chr1	64719968	64720102	+	7.61788	chr1:64719968:64720102:+_P1	.	UN
chr1	65537608	65537751	+	40.2163	Ube2m_P2	protein_coding	P2
chr1	65537902	65538341	+	359.568	Ube2m_P1	protein_coding	P1
chr1	65539317	65539540	+	3.14007	Ube2m_P5	protein_coding	P5
chr1	65539641	65539719	+	3.39754	Ube2m_P4	protein_coding	P4
chr1	65540406	65540455	+	3.83413	Ube2m_P3	protein_coding	P3
chr1	65541141	65541429	+	181.827	Chmp2a_P1	protein_coding	P1
chr1	65541895	65542061	+	7.19248	Chmp2a_P2	protein_coding	P2
chr1	65543046	65543058	+	0.559726	Chmp2a_P3	protein_coding	P3
chr1	65563954	65564222	+	10.7971	Zbtb45_P1	protein_coding	P1
chr1	65781501	65781562	+	4.13638	Zfp329_P1	protein_coding	P1
chr1	69615413	69615476	+	3.09529	Zfp418_P1	protein_coding	P1
chr1	69672974	69673022	+	3.4759	chr1:69672974:69673022:+_P1	.	UN
chr1	69853513	69853574	+	2.19413	Zfp954_P1	protein_coding	P1
chr1	69978568	69978677	+	2.27809	chr1:69978568:69978677:+_P1	.	UN
chr1	70210774	70210908	+	45.0356	chr1:70210774:70210908:+_P1	.	UN
chr1	70222959	70222985	+	0.694061	Peg3_P1	protein_coding	P1
chr1	70244831	70244933	+	6.70552	chr1:70244831:70244933:+_P1	.	UN
chr1	71244269	71244284	+	0.65488	chr1:71244269:71244284:+_P1	.	UN
chr1	71416073	71416120	+	0.682866	Zfp787_P2	protein_coding	P2
chr1	71434817	71434825	+	2.50757	Zfp787_P1	protein_coding	P1
chr1	72329901	72329970	+	4.13078	chr1:72329901:72329970:+_P1	.	UN
chr1	72356832	72356909	+	3.683	Zfp865_P1	protein_coding	P1
chr1	72380295	72380420	+	9.4034	Fiz1_P1	protein_coding	P1
chr1	72399123	72399237	+	7.75221	Zfp579_P1	protein_coding	P1
chr1	72425654	72425731	+	1.27058	Sbk2_P1	protein_coding	P1
chr1	72524476	72524660	+	72.1431	Isoc2b_P1	protein_coding	P1
chr1	72537404	72537424	+	0.789214	Isoc2b_P2	protein_coding	P2
chr1	72580298	72580547	+	238.393	Ube2s_P1	protein_coding	P1
chr1	72581156	72581302	+	1.73515	Ube2s_P3	protein_coding	P3
chr1	72582129	72582212	+	6.47603	Ube2s_P2	protein_coding	P2
chr1	72624616	72624956	+	24.947	AABR07071876.1_P1	pseudogene	P1
chr1	72661168	72661211	+	1.2258	Cox6b2_P1	protein_coding	P1
chr1	72732585	72732671	+	32.2738	Hspbp1_P1	protein_coding	P1
chr1	72757806	72757938	+	55.9335	Ppp6r1_P1	protein_coding	P1
chr1	72785020	72785070	+	0.873173	Tmem86b_P1	protein_coding	P1
chr1	72861178	72861215	+	0.53174	Syt5_P1	protein_coding	P1
chr1	72881391	72881402	+	34.6191	Dnaaf3_P2	protein_coding	P2
chr1	72882646	72883049	+	4418.4	Dnaaf3_P1	protein_coding	P1
chr1	72883178	72883191	+	30.3036	Tnni3_P4	protein_coding	P4
chr1	72883360	72884324	+	565.105	Tnni3_P1	protein_coding	P1
chr1	72884751	72884854	+	54.0808	Tnni3_P3	protein_coding	P3
chr1	72885316	72885492	+	88.9014	Tnni3_P2	protein_coding	P2
chr1	72886340	72886391	+	5.65324	Tnni3_P5	protein_coding	P5
chr1	72886516	72886547	+	2.51877	chr1:72886516:72886547:+_P1	.	UN
chr1	72886879	72887015	+	1.27618	chr1:72886879:72887015:+_P1	.	UN
chr1	72889269	72889271	+	0.861979	Tnnt1_P1	protein_coding	P1
chr1	72903092	72903243	+	32.0835	Ppp1r12c_P1	protein_coding	P1
chr1	72956007	72956105	+	16.6071	Rdh13_P1	protein_coding	P1
chr1	72956247	72956367	+	1.4385	Rdh13_P2	protein_coding	P2
chr1	73717327	73717408	+	3.59344	chr1:73717327:73717408:+_P1	.	UN
chr1	73717544	73717602	+	1.47768	chr1:73717544:73717602:+_P1	.	UN
chr1	73720898	73721099	+	4.86962	Leng9_P1	protein_coding	P1
chr1	73733543	73733578	+	0.677269	chr1:73733543:73733578:+_P1	.	UN
chr1	75356164	75356275	+	6.90143	Lig1_P1	protein_coding	P1
chr1	77944056	77944169	+	21.3088	chr1:77944056:77944169:+_P1	.	UN
chr1	77993989	77994333	+	102.2	Napa_P1	protein_coding	P1
chr1	78015687	78015809	+	23.307	Kptn_P1	protein_coding	P1
chr1	78016013	78016074	+	0.699658	Kptn_P2	protein_coding	P2
chr1	78069127	78069204	+	1.73515	Meis3_P1	protein_coding	P1
chr1	78353414	78353477	+	3.75576	chr1:78353414:78353477:+_P1	.	UN
chr1	78354071	78354177	+	4.2987	Zc3h4_P2	protein_coding	P2
chr1	78354662	78355109	+	36.08	Zc3h4_P1	protein_coding	P1
chr1	78369735	78369814	+	2.23891	Zc3h4_P3	protein_coding	P3
chr1	78417851	78417956	+	51.6012	Tmem160_P1	protein_coding	P1
chr1	78671158	78671298	+	76.9736	Ap2s1_P1	protein_coding	P1
chr1	78681259	78681356	+	1.26498	Ap2s1_P2	protein_coding	P2
chr1	78682602	78682604	+	0.761228	Ap2s1_P3	protein_coding	P3
chr1	78710513	78710538	+	7.67385	Slc1a5_P1	protein_coding	P1
chr1	78740303	78740394	+	31.1824	Strn4_P1	protein_coding	P1
chr1	78751588	78751637	+	0.789214	Strn4_P3	protein_coding	P3
chr1	78755225	78755229	+	0.783617	Strn4_P4	protein_coding	P4
chr1	78755515	78755604	+	2.37884	Strn4_P2	protein_coding	P2
chr1	78756381	78756403	+	0.375017	Strn4_P5	protein_coding	P5
chr1	78767787	78768000	+	18.3534	Prkd2_P1	protein_coding	P1
chr1	78800732	78800908	+	5.27262	Dact3_P1	protein_coding	P1
chr1	78818377	78818428	+	0.923549	Gng8_P1	protein_coding	P1
chr1	78833206	78833298	+	2.44041	Ptgir_P1	protein_coding	P1
chr1	78843544	78843573	+	0.47017	chr1:78843544:78843573:+_P1	.	UN
chr1	78844598	78844683	+	1.81911	chr1:78844598:78844683:+_P1	.	UN
chr1	78933065	78933321	+	6.89583	Ccdc8_P1	protein_coding	P1
chr1	79631790	79631841	+	0.934743	Mill1_P1	protein_coding	P1
chr1	79754565	79754611	+	1.80232	Micb_P1	protein_coding	P1
chr1	79831097	79831169	+	12.6778	Nova2_P1	protein_coding	P1
chr1	79898472	79898576	+	3.55986	Mypop_P2	protein_coding	P2
chr1	79911464	79911587	+	30.4883	Mypop_P1	protein_coding	P1
chr1	79931071	79931174	+	19.4729	Sympk_P1	protein_coding	P1
chr1	79981166	79981368	+	26.0553	Dmwd_P1	protein_coding	P1
chr1	79981650	79981739	+	0.873173	Dmwd_P2	protein_coding	P2
chr1	79989006	79989354	+	342.368	Dmpk_P1	protein_coding	P1
chr1	79991119	79991205	+	14.5025	Dmpk_P2	protein_coding	P2
chr1	79991456	79991666	+	3.62703	Dmpk_P3	protein_coding	P3
chr1	79998489	79998662	+	1.85829	Dmpk_P4	protein_coding	P4
chr1	79998837	79998915	+	1.39932	Dmpk_P5	protein_coding	P5
chr1	79999644	79999848	+	4.61774	chr1:79999644:79999848:+_P1	.	UN
chr1	80000131	80000162	+	1.86389	Six5_P1	protein_coding	P1
chr1	80028872	80028940	+	6.15699	Fbxo46_P1	protein_coding	P1
chr1	80039101	80039194	+	0.884368	Fbxo46_P2	protein_coding	P2
chr1	80057107	80057203	+	61.1557	Snrpd2_P1	protein_coding	P1
chr1	80058522	80058581	+	1.62321	Snrpd2_P2	protein_coding	P2
chr1	80092367	80092437	+	10.4781	Eml2_P1	protein_coding	P1
chr1	80125614	80125743	+	14.8272	chr1:80125614:80125743:+_P1	.	UN
chr1	80141564	80141735	+	60.3497	Opa3_P1	protein_coding	P1
chr1	80158656	80158722	+	1.08587	Opa3_P2	protein_coding	P2
chr1	80203395	80203513	+	52.2393	Rtn2_P1	protein_coding	P1
chr1	80205500	80205519	+	4.25392	Rtn2_P2	protein_coding	P2
chr1	80205808	80205936	+	1.93106	Rtn2_P3	protein_coding	P3
chr1	80206812	80206822	+	1.72955	Rtn2_P4	protein_coding	P4
chr1	80207613	80207669	+	0.996313	Rtn2_P5	protein_coding	P5
chr1	80216441	80216519	+	2.97215	chr1:80216441:80216519:+_P1	.	UN
chr1	80256926	80257067	+	22.6465	Ercc1_P1	protein_coding	P1
chr1	80257173	80257262	+	1.69597	Ercc1_P2	protein_coding	P2
chr1	80261388	80261391	+	0.968327	Ercc1_P3	protein_coding	P3
chr1	80271544	80271617	+	1.09706	chr1:80271544:80271617:+_P1	.	UN
chr1	80272711	80272892	+	16.0641	chr1:80272711:80272892:+_P1	.	UN
chr1	80273559	80273637	+	1.60082	chr1:80273559:80273637:+_P1	.	UN
chr1	80273868	80274127	+	48.0413	chr1:80273868:80274127:+_P1	.	UN
chr1	80281330	80281404	+	0.867576	Ppp1r13l_P1	protein_coding	P1
chr1	80293544	80293611	+	6.12341	Ercc2_P1	protein_coding	P1
chr1	80321359	80321774	+	4494.41	Ckm_P1	protein_coding	P1
chr1	80324930	80325144	+	282.354	Ckm_P2	protein_coding	P2
chr1	80325613	80325768	+	41.3806	Ckm_P3	protein_coding	P3
chr1	80326233	80326365	+	16.6183	Ckm_P5	protein_coding	P5
chr1	80327647	80327815	+	19.708	Ckm_P4	protein_coding	P4
chr1	80417461	80417610	+	72.9491	Trappc6a_P1	protein_coding	P1
chr1	80422585	80422651	+	1.66798	Trappc6a_P2	protein_coding	P2
chr1	80422804	80422841	+	1.4273	Trappc6a_P3	protein_coding	P3
chr1	80920718	80920845	+	30.5331	Zfp180_P1	protein_coding	P1
chr1	80944172	80944208	+	0.699658	AABR07002682.1_P1	lincRNA	P1
chr1	80966080	80966122	+	1.08587	chr1:80966080:80966122:+_P1	.	UN
chr1	80982510	80982512	+	0.30785	AC118165.1_P5	protein_coding	P5
chr1	80982752	80982826	+	2.39003	AC118165.1_P1	protein_coding	P1
chr1	80982963	80982991	+	0.638088	AC118165.1_P4	protein_coding	P4
chr1	81072523	81072597	+	1.70717	AC118165.1_P2	protein_coding	P2
chr1	81093241	81093299	+	1.38252	AC118165.1_P3	protein_coding	P3
chr1	81260117	81260271	+	5.89392	Smg9_P1	protein_coding	P1
chr1	81328092	81328174	+	2.68109	Plaur_P1	protein_coding	P1
chr1	81372811	81373183	+	7.40518	Zfp428_P1	protein_coding	P1
chr1	81395802	81395908	+	2.72027	Irgq_P1	protein_coding	P1
chr1	81396020	81396090	+	0.77802	Irgq_P2	protein_coding	P2
chr1	81413236	81413420	+	24.9694	Xrcc1_P1	protein_coding	P1
chr1	81456958	81457047	+	15.6723	Ethe1_P1	protein_coding	P1
chr1	81769210	81769284	+	7.00778	chr1:81769210:81769284:+_P1	.	UN
chr1	81779604	81779605	+	0.817201	Arhgef1_P1	protein_coding	P1
chr1	81946436	81946511	+	1.32095	chr1:81946436:81946511:+_P1	.	UN
chr1	81952004	81952203	+	16.2712	Zfp574_P1	protein_coding	P1
chr1	82090522	82090601	+	6.19057	Zfp526_P1	protein_coding	P1
chr1	82136332	82136452	+	2.84901	chr1:82136332:82136452:+_P1	.	UN
chr1	82137077	82137241	+	7.25405	chr1:82137077:82137241:+_P1	.	UN
chr1	82150991	82151058	+	2.02061	Cic_P1	protein_coding	P1
chr1	82151458	82151500	+	1.76874	Cic_P2	protein_coding	P2
chr1	82184662	82184953	+	9.73364	Megf8_P1	protein_coding	P1
chr1	82245191	82245297	+	5.16628	chr1:82245191:82245297:+_P1	.	UN
chr1	82413165	82413283	+	39.6902	Dmac2_P1	protein_coding	P1
chr1	82414608	82414638	+	0.587713	Dmac2_P3	protein_coding	P3
chr1	82417089	82417097	+	0.638088	Dmac2_P2	protein_coding	P2
chr1	82420373	82420404	+	0.486962	B3gnt8_P2	protein_coding	P2
chr1	82420973	82421049	+	4.28191	B3gnt8_P1	protein_coding	P1
chr1	82452435	82452577	+	15.107	Exosc5_P1	protein_coding	P1
chr1	82473731	82473818	+	5.94429	B9d2_P1	protein_coding	P1
chr1	82480071	82480214	+	47.3473	Tgfb1_P1	protein_coding	P1
chr1	82480368	82480481	+	2.4516	Tgfb1_P3	protein_coding	P3
chr1	82480600	82480724	+	5.02634	Tgfb1_P2	protein_coding	P2
chr1	82480992	82481046	+	0.979521	Tgfb1_P4	protein_coding	P4
chr1	82481199	82481299	+	0.710853	Tgfb1_P5	protein_coding	P5
chr1	82581383	82581459	+	0.833992	chr1:82581383:82581459:+_P1	.	UN
chr1	83965470	83965557	+	0.666074	Cyp2t1_P2	protein_coding	P2
chr1	83965738	83965799	+	0.923549	Cyp2t1_P1	protein_coding	P1
chr1	84008060	84008168	+	3.8845	chr1:84008060:84008168:+_P1	.	UN
chr1	84008630	84008727	+	6.12341	RGD1560854_P1	protein_coding	P1
chr1	84044443	84044591	+	5.96668	Coq8b_P1	protein_coding	P1
chr1	84067832	84067964	+	3.84532	Numbl_P1	protein_coding	P1
chr1	84256052	84256201	+	67.1896	Blvrb_P1	protein_coding	P1
chr1	84270406	84270455	+	0.492559	Blvrb_P3	protein_coding	P3
chr1	84273449	84273471	+	3.86211	Blvrb_P2	protein_coding	P2
chr1	84280877	84280963	+	7.55631	Sertad3_P1	protein_coding	P1
chr1	84293064	84293111	+	16.316	Sertad1_P1	protein_coding	P1
chr1	84312739	84312814	+	2.54676	Prx_P1	protein_coding	P1
chr1	84361687	84361800	+	24.2977	RGD1307554_P2	protein_coding	P2
chr1	84366909	84367064	+	29.2401	RGD1307554_P1	protein_coding	P1
chr1	84371219	84371238	+	0.475767	RGD1307554_P3	protein_coding	P3
chr1	84400863	84401112	+	81.9216	chr1:84400863:84401112:+_P1	.	UN
chr1	84415307	84415489	+	38.6939	Akt2_P1	protein_coding	P1
chr1	84416657	84416809	+	2.40123	Akt2_P3	protein_coding	P3
chr1	84417427	84417699	+	19.4281	Akt2_P2	protein_coding	P2
chr1	84441052	84441120	+	0.598907	Akt2_P4	protein_coding	P4
chr1	84529074	84529079	+	2.23331	chr1:84529074:84529079:+_P1	.	UN
chr1	84573494	84573524	+	100.885	AABR07071891.2_P1	protein_coding	P1
chr1	84576064	84576145	+	6.19057	chr1:84576064:84576145:+_P1	.	UN
chr1	84636540	84636600	+	2.20532	chr1:84636540:84636600:+_P1	.	UN
chr1	84676590	84676679	+	1.57283	chr1:84676590:84676679:+_P1	.	UN
chr1	85103494	85103592	+	46.7875	Fbl_P1	protein_coding	P1
chr1	85107742	85107918	+	3.36955	Fbl_P2	protein_coding	P2
chr1	85108024	85108083	+	0.951535	Fbl_P3	protein_coding	P3
chr1	85112802	85112909	+	25.5515	Dyrk1b_P1	protein_coding	P1
chr1	85113437	85113627	+	4.2875	Dyrk1b_P2	protein_coding	P2
chr1	85162364	85162519	+	20.861	Pak4_P1	protein_coding	P1
chr1	85323929	85324040	+	8.68695	Samd4b_P1	protein_coding	P1
chr1	85368266	85368515	+	75.3224	Med29_P1	protein_coding	P1
chr1	85380059	85380141	+	20.7994	Zfp36_P1	protein_coding	P1
chr1	85380924	85381018	+	5.47972	Zfp36_P2	protein_coding	P2
chr1	85381142	85381159	+	0.811603	Zfp36_P3	protein_coding	P3
chr1	85386401	85386553	+	7.96491	Plekhg2_P1	protein_coding	P1
chr1	85387516	85387645	+	0.822798	Plekhg2_P4	protein_coding	P4
chr1	85391115	85391157	+	0.945938	Plekhg2_P3	protein_coding	P3
chr1	85391365	85391434	+	0.968327	Plekhg2_P2	protein_coding	P2
chr1	85437754	85438060	+	85.0896	Supt5h_P1	protein_coding	P1
chr1	85447212	85447372	+	1.75754	Supt5h_P2	protein_coding	P2
chr1	85470776	85470931	+	186.299	Timm50_P1	protein_coding	P1
chr1	85471968	85472094	+	2.84901	Timm50_P2	protein_coding	P2
chr1	85480510	85480607	+	1.28177	chr1:85480510:85480607:+_P1	.	UN
chr1	86873055	86873107	+	1.75194	AABR07002848.1_P1	protein_coding	P1
chr1	86923706	86923787	+	22.2491	Sars2_P1	protein_coding	P1
chr1	86948844	86949009	+	99.7488	Sirt2_P1	protein_coding	P1
chr1	86966511	86966558	+	0.800409	Sirt2_P2	protein_coding	P2
chr1	86994099	86994166	+	7.03576	chr1:86994099:86994166:+_P1	.	UN
chr1	86996033	86996348	+	166.116	Hnrnpl_P1	protein_coding	P1
chr1	86998185	86998267	+	2.69788	Hnrnpl_P3	protein_coding	P3
chr1	86999864	86999916	+	4.18116	Hnrnpl_P2	protein_coding	P2
chr1	87005977	87006015	+	0.570921	Hnrnpl_P4	protein_coding	P4
chr1	87009711	87009874	+	126.744	Ech1_P1	protein_coding	P1
chr1	87010366	87010772	+	23.4413	Ech1_P2	protein_coding	P2
chr1	87013565	87013818	+	4.97597	Ech1_P5	protein_coding	P5
chr1	87014998	87015251	+	11.4296	Ech1_P3	protein_coding	P3
chr1	87015486	87015582	+	5.3118	Ech1_P4	protein_coding	P4
chr1	87180600	87180682	+	3.91809	Yif1b_P1	protein_coding	P1
chr1	87210715	87210754	+	2.60273	chr1:87210715:87210754:+_P1	.	UN
chr1	87228323	87228793	+	33.6508	Ppp1r14a_P1	protein_coding	P1
chr1	87230389	87230417	+	1.41051	Ppp1r14a_P2	protein_coding	P2
chr1	87230664	87230794	+	0.973924	Ppp1r14a_P3	protein_coding	P3
chr1	87231133	87231180	+	0.660477	Ppp1r14a_P4	protein_coding	P4
chr1	87647014	87647140	+	10.8867	chr1:87647014:87647140:+_P1	.	UN
chr1	87696971	87697024	+	4.39945	Zfp84_P2	protein_coding	P2
chr1	87790363	87790412	+	4.43863	Zfp84_P1	protein_coding	P1
chr1	87938044	87938163	+	2.446	Map4k1_P2	protein_coding	P2
chr1	87957606	87957678	+	3.41993	Map4k1_P1	protein_coding	P1
chr1	88581104	88581154	+	1.94785	Zfp382_P1	protein_coding	P1
chr1	88620279	88620289	+	3.28559	Cox7a1_P1	protein_coding	P1
chr1	88632150	88632218	+	3.55426	AABR07002902.1_P1	lincRNA	P1
chr1	88875368	88875526	+	15.3533	Tyrobp_P1	protein_coding	P1
chr1	88875966	88875968	+	1.0299	Tyrobp_P2	protein_coding	P2
chr1	88876225	88876267	+	0.733242	Tyrobp_P3	protein_coding	P3
chr1	89007139	89007218	+	2.58034	AC141526.2_P2	miRNA	P2
chr1	89007333	89007436	+	6.86784	AC141526.2_P1	miRNA	P1
chr1	89008009	89008315	+	1983.58	Hspb6_P1	protein_coding	P1
chr1	89009062	89010063	+	106.119	Hspb6_P2	protein_coding	P2
chr1	89017469	89017582	+	31.8988	U2af1l4_P1	protein_coding	P1
chr1	89017958	89017999	+	1.05788	U2af1l4_P2	protein_coding	P2
chr1	89039706	89039808	+	0.878771	chr1:89039706:89039808:+_P1	.	UN
chr1	89179870	89179937	+	1.41051	chr1:89179870:89179937:+_P1	.	UN
chr1	89204739	89204841	+	5.82675	Sbsn_P1	protein_coding	P1
chr1	89382859	89382869	+	0.694061	chr1:89382859:89382869:+_P1	.	UN
chr1	89491625	89491629	+	0.660477	Lgi4_P2	protein_coding	P2
chr1	89491760	89491934	+	2.043	Lgi4_P1	protein_coding	P1
chr1	90246373	90246442	+	0.660477	chr1:90246373:90246442:+_P1	.	UN
chr1	90820647	90820679	+	14.8663	AABR07002969.1_P1	lincRNA	P1
chr1	90918081	90918129	+	0.94034	LOC108348197_P1	protein_coding	P1
chr1	91070487	91070585	+	0.750033	chr1:91070487:91070585:+_P1	.	UN
chr1	91363485	91363492	+	3.15126	Cebpa_P1	protein_coding	P1
chr1	91663690	91663794	+	10.0471	Cep89_P1	protein_coding	P1
chr1	91746230	91746236	+	4.37146	AC136661.1_P1	protein_coding	P1
chr1	91857027	91857107	+	6.19617	Ankrd27_P1	protein_coding	P1
chr1	93242017	93242036	+	7.12532	RGD1562402_P1	protein_coding	P1
chr1	94574213	94574321	+	31.4958	chr1:94574213:94574321:+_P1	.	UN
chr1	94579178	94579217	+	0.912354	LOC690000_P1	protein_coding	P1
chr1	94669569	94669638	+	0.945938	chr1:94669569:94669638:+_P1	.	UN
chr1	94718393	94718550	+	203.086	AC120712.3_P1	unprocessed_pseudogene	P1
chr1	94788435	94788496	+	0.884368	chr1:94788435:94788496:+_P1	.	UN
chr1	94847505	94847584	+	3.04491	chr1:94847505:94847584:+_P1	.	UN
chr1	94871533	94871617	+	6.28013	chr1:94871533:94871617:+_P1	.	UN
chr1	94880225	94880301	+	1.16983	chr1:94880225:94880301:+_P1	.	UN
chr1	94880571	94880651	+	5.89952	chr1:94880571:94880651:+_P1	.	UN
chr1	98048533	98048638	+	6.28013	chr1:98048533:98048638:+_P1	.	UN
chr1	98168465	98168565	+	1.41051	chr1:98168465:98168565:+_P1	.	UN
chr1	98211524	98211613	+	6.28573	chr1:98211524:98211613:+_P1	.	UN
chr1	98398609	98398665	+	1.16423	Cd33_P1	protein_coding	P1
chr1	98472946	98472985	+	1.2202	chr1:98472946:98472985:+_P1	.	UN
chr1	98487118	98487198	+	0.744436	chr1:98487118:98487198:+_P1	.	UN
chr1	98614919	98615192	+	16.9877	chr1:98614919:98615192:+_P1	.	UN
chr1	98617059	98617062	+	0.363822	chr1:98617059:98617062:+_P1	.	UN
chr1	99483166	99483284	+	0.94034	chr1:99483166:99483284:+_P1	.	UN
chr1	99500534	99500716	+	2.79303	chr1:99500534:99500716:+_P1	.	UN
chr1	99599615	99599658	+	1.41611	Ctu1_P1	protein_coding	P1
chr1	100220760	100220850	+	4.85843	chr1:100220760:100220850:+_P1	.	UN
chr1	100407016	100407103	+	6.15699	Syt3_P1	protein_coding	P1
chr1	100447155	100447550	+	177.215	Lrrc4b_P1	protein_coding	P1
chr1	100447912	100447962	+	0.77802	Lrrc4b_P3	protein_coding	P3
chr1	100468562	100468629	+	2.52437	Lrrc4b_P2	protein_coding	P2
chr1	100473498	100473992	+	85.9068	Josd2_P1	protein_coding	P1
chr1	100476128	100476150	+	0.475767	Josd2_P2	protein_coding	P2
chr1	100479386	100479857	+	28.283	chr1:100479386:100479857:+_P1	.	UN
chr1	100480001	100480088	+	0.660477	chr1:100480001:100480088:+_P1	.	UN
chr1	100501550	100501689	+	3.36955	Fam71e1_P1	protein_coding	P1
chr1	100577508	100577538	+	2.28368	Napsa_P1	protein_coding	P1
chr1	100755657	100755731	+	17.3347	Vrk3_P1	protein_coding	P1
chr1	100755933	100756010	+	1.81351	Vrk3_P2	protein_coding	P2
chr1	100811231	100811308	+	0.996313	Nup62_P3	protein_coding	P3
chr1	100811411	100811777	+	32.2179	Nup62_P1	protein_coding	P1
chr1	100814679	100814766	+	0.649283	Nup62_P4	protein_coding	P4
chr1	100824881	100825025	+	1.46648	Nup62_P2	protein_coding	P2
chr1	100845543	100845655	+	29.8838	Akt1s1_P1	protein_coding	P1
chr1	100846222	100846372	+	26.3799	Akt1s1_P2	protein_coding	P2
chr1	100849060	100849167	+	0.923549	Akt1s1_P4	protein_coding	P4
chr1	100851589	100851635	+	2.89379	Akt1s1_P3	protein_coding	P3
chr1	100853880	100853958	+	7.27644	Pnkp_P1	protein_coding	P1
chr1	100865429	100865670	+	2.97215	chr1:100865429:100865670:+_P1	.	UN
chr1	100891839	100891935	+	3.21843	Fuz_P1	protein_coding	P1
chr1	100992238	100992310	+	14.5137	Irf3_P1	protein_coding	P1
chr1	101012741	101012963	+	57.2712	Rras_P1	protein_coding	P1
chr1	101014055	101014170	+	1.47768	Rras_P2	protein_coding	P2
chr1	101055552	101055658	+	32.4026	Nosip_P1	protein_coding	P1
chr1	101068926	101068976	+	4.10279	Nosip_P2	protein_coding	P2
chr1	101069369	101069425	+	0.744436	Nosip_P3	protein_coding	P3
chr1	101120781	101120821	+	0.817201	chr1:101120781:101120821:+_P1	.	UN
chr1	101151093	101151257	+	5.48532	chr1:101151093:101151257:+_P1	.	UN
chr1	101152652	101152708	+	3.0673	Pih1d1_P1	protein_coding	P1
chr1	101213767	101213870	+	2.08778	Tead2_P1	protein_coding	P1
chr1	101324608	101325968	+	608.395	Hrc_P1	protein_coding	P1
chr1	101326246	101326262	+	0.475767	Hrc_P3	protein_coding	P3
chr1	101326543	101326583	+	1.09706	Hrc_P2	protein_coding	P2
chr1	101398245	101398333	+	1.59522	Kcna7_P1	protein_coding	P1
chr1	101427151	101427530	+	78.3505	Gys1_P1	protein_coding	P1
chr1	101430618	101430727	+	2.21092	Gys1_P2	protein_coding	P2
chr1	101432124	101432184	+	0.761228	Gys1_P4	protein_coding	P4
chr1	101432452	101432498	+	0.845187	Gys1_P3	protein_coding	P3
chr1	101517692	101517779	+	8.14962	Plekha4_P1	protein_coding	P1
chr1	101552351	101552404	+	0.626894	chr1:101552351:101552404:+_P1	.	UN
chr1	101554575	101554658	+	104.311	Bcat2_P1	protein_coding	P1
chr1	101560243	101560325	+	1.28177	Bcat2_P4	protein_coding	P4
chr1	101567245	101567265	+	1.37133	Bcat2_P3	protein_coding	P3
chr1	101567675	101567781	+	0.90116	Bcat2_P5	protein_coding	P5
chr1	101570178	101570201	+	1.8359	Bcat2_P2	protein_coding	P2
chr1	101609191	101609272	+	16.4672	chr1:101609191:101609272:+_P1	.	UN
chr1	101624269	101624347	+	1.41051	Mamstr_P1	protein_coding	P1
chr1	101682043	101682231	+	1.51126	Ca11_P3	protein_coding	P3
chr1	101683121	101683178	+	5.1159	Ca11_P2	protein_coding	P2
chr1	101683334	101683430	+	7.40518	Ca11_P1	protein_coding	P1
chr1	101687715	101687966	+	5.36778	Dbp_P2	protein_coding	P2
chr1	101690477	101690648	+	9.63849	Dbp_P1	protein_coding	P1
chr1	101692555	101692610	+	0.498157	Dbp_P3	protein_coding	P3
chr1	101700808	101700969	+	351.323	chr1:101700808:101700969:+_P1	.	UN
chr1	101701980	101702067	+	9.33064	Rpl18_P1	protein_coding	P1
chr1	101702267	101702360	+	1.16983	Rpl18_P4	protein_coding	P4
chr1	101702680	101702769	+	1.66798	Rpl18_P2	protein_coding	P2
chr1	101703018	101703074	+	1.28737	Rpl18_P3	protein_coding	P3
chr1	101859184	101859581	+	109.191	Kdelr1_P1	protein_coding	P1
chr1	101860177	101860241	+	0.895562	Kdelr1_P3	protein_coding	P3
chr1	101868434	101868453	+	1.36573	Kdelr1_P2	protein_coding	P2
chr1	101884048	101884153	+	51.8978	Tmem143_P1	protein_coding	P1
chr1	101884347	101884499	+	10.2598	Tmem143_P2	protein_coding	P2
chr1	102017175	102017349	+	39.5447	Nomo1_P1	protein_coding	P1
chr1	102104773	102104872	+	2.33406	chr1:102104773:102104872:+_P1	.	UN
chr1	102106035	102106080	+	0.604505	chr1:102106035:102106080:+_P1	.	UN
chr1	102414577	102414656	+	0.53174	Kcnc1_P1	protein_coding	P1
chr1	102849589	102849635	+	0.750033	Gtf2h1_P2	protein_coding	P2
chr1	102849873	102849956	+	13.0248	Gtf2h1_P1	protein_coding	P1
chr1	102900232	102900361	+	899.648	Ldha_P1	protein_coding	P1
chr1	102902039	102902172	+	8.12723	Ldha_P3	protein_coding	P3
chr1	102904800	102904892	+	6.26334	Ldha_P5	protein_coding	P5
chr1	102908465	102908563	+	6.80068	Ldha_P4	protein_coding	P4
chr1	102909042	102909476	+	22.0028	Ldha_P2	protein_coding	P2
chr1	103139627	103139674	+	0.783617	chr1:103139627:103139674:+_P1	.	UN
chr1	103172948	103173104	+	28.8035	Tmem86a_P1	protein_coding	P1
chr1	104106179	104106307	+	11.4408	Zdhhc13_P1	protein_coding	P1
chr1	104575771	104575864	+	25.3444	Nav2_P1	protein_coding	P1
chr1	104575997	104576065	+	0.632491	Nav2_P4	protein_coding	P4
chr1	104576566	104576585	+	0.397406	Nav2_P5	protein_coding	P5
chr1	104858213	104858451	+	7.52272	Nav2_P2	protein_coding	P2
chr1	104940090	104940172	+	2.95536	Nav2_P3	protein_coding	P3
chr1	105094342	105094433	+	3.03372	Htatip2_P1	protein_coding	P1
chr1	105113542	105113677	+	7.5731	Prmt3_P1	protein_coding	P1
chr1	105134148	105134210	+	1.11386	Prmt3_P2	protein_coding	P2
chr1	106874589	106874786	+	15.3197	chr1:106874589:106874786:+_P1	.	UN
chr1	114186907	114187043	+	15.0231	Tubgcp5_P1	protein_coding	P1
chr1	114258586	114258864	+	35.1732	Cyfip1_P1	protein_coding	P1
chr1	114453010	114453250	+	33.9306	Herc2_P1	protein_coding	P1
chr1	114772895	114772955	+	1.42171	Oca2_P1	protein_coding	P1
chr1	116587759	116587925	+	42.2146	Ube3a_P1	protein_coding	P1
chr1	122981674	122981767	+	5.65324	Ndn_P1	protein_coding	P1
chr1	124816473	124816552	+	1.38812	chr1:124816473:124816552:+_P1	.	UN
chr1	125124442	125124726	+	10.6852	Mtmr10_P1	protein_coding	P1
chr1	125229521	125229628	+	112.858	Mcee_P1	protein_coding	P1
chr1	126364948	126365029	+	3.17925	chr1:126364948:126365029:+_P1	.	UN
chr1	126523083	126523460	+	70.811	Tarsl2_P1	protein_coding	P1
chr1	126586499	126586550	+	4.88081	Tm2d3_P1	protein_coding	P1
chr1	126749171	126749782	+	38.7107	Pcsk6_P1	protein_coding	P1
chr1	126961357	126961446	+	14.8495	Snrpa1_P1	protein_coding	P1
chr1	126979516	126979685	+	79.6659	Selenos_P1	protein_coding	P1
chr1	126980308	126980344	+	0.34703	Selenos_P2	protein_coding	P2
chr1	127010177	127010210	+	5.1215	Chsy1_P1	protein_coding	P1
chr1	127010433	127010447	+	0.688464	Chsy1_P2	protein_coding	P2
chr1	127025553	127025561	+	0.475767	Chsy1_P3	protein_coding	P3
chr1	127599627	127599698	+	2.31167	chr1:127599627:127599698:+_P1	.	UN
chr1	127802839	127802908	+	2.07099	Adamts17_P1	protein_coding	P1
chr1	128199095	128199237	+	30.4379	Lysmd4_P1	protein_coding	P1
chr1	128199377	128199561	+	3.0785	Lysmd4_P2	protein_coding	P2
chr1	128604312	128604363	+	0.486962	chr1:128604312:128604363:+_P1	.	UN
chr1	128606465	128606601	+	6.03385	Ttc23_P1	protein_coding	P1
chr1	128606791	128606814	+	0.324641	Ttc23_P2	protein_coding	P2
chr1	128923914	128924169	+	14.1163	Igf1r_P1	protein_coding	P1
chr1	128924480	128924651	+	3.24641	Igf1r_P2	protein_coding	P2
chr1	128924883	128924903	+	0.291058	Igf1r_P3	protein_coding	P3
chr1	131459205	131459257	+	1.0299	chr1:131459205:131459257:+_P1	.	UN
chr1	134696591	134696649	+	1.16983	chr1:134696591:134696649:+_P1	.	UN
chr1	134698972	134699414	+	65.2697	Rgma_P1	protein_coding	P1
chr1	134715212	134715302	+	7.90334	Rgma_P2	protein_coding	P2
chr1	134731880	134731882	+	1.47768	Rgma_P3	protein_coding	P3
chr1	134888411	134888485	+	1.85269	chr1:134888411:134888485:+_P1	.	UN
chr1	134992284	134992397	+	3.66061	AABR07004269.3_P1	processed_pseudogene	P1
chr1	135083834	135084375	+	43.2669	Fam174b_P1	protein_coding	P1
chr1	135134535	135134539	+	0.688464	Fam174b_P2	protein_coding	P2
chr1	137014151	137014270	+	26.9676	Akap13_P1	protein_coding	P1
chr1	137148815	137148913	+	4.77447	Akap13_P3	protein_coding	P3
chr1	137175245	137175349	+	1.29297	Akap13_P5	protein_coding	P5
chr1	137176722	137176962	+	3.33037	Akap13_P4	protein_coding	P4
chr1	137207546	137207628	+	5.04873	Akap13_P2	protein_coding	P2
chr1	140477652	140477733	+	13.9372	Mrps11_P2	protein_coding	P2
chr1	140477877	140477999	+	23.6596	Mrps11_P1	protein_coding	P1
chr1	140584313	140584465	+	10.5788	Aen_P1	protein_coding	P1
chr1	140602200	140602247	+	2.67549	Isg20_P1	protein_coding	P1
chr1	140602444	140602503	+	0.486962	Isg20_P2	protein_coding	P2
chr1	140998214	140998344	+	20.1837	Abhd2_P1	protein_coding	P1
chr1	141218054	141218235	+	131.413	LOC691427_P1	protein_coding	P1
chr1	141672601	141672699	+	0.951535	chr1:141672601:141672699:+_P1	.	UN
chr1	141765658	141765732	+	0.923549	chr1:141765658:141765732:+_P1	.	UN
chr1	141766361	141766849	+	8.9948	chr1:141766361:141766849:+_P1	.	UN
chr1	141767436	141767525	+	4.06361	Zfp710_P1	protein_coding	P1
chr1	141767729	141767846	+	1.25938	Zfp710_P2	protein_coding	P2
chr1	141880404	141880430	+	0.436587	chr1:141880404:141880430:+_P1	.	UN
chr1	141973272	141973389	+	8.33433	chr1:141973272:141973389:+_P1	.	UN
chr1	141986103	141986171	+	0.806006	Sema4b_P1	protein_coding	P1
chr1	142020690	142020785	+	7.35481	chr1:142020690:142020785:+_P1	.	UN
chr1	142050424	142050517	+	26.1784	Ngrn_P1	protein_coding	P1
chr1	142060909	142061036	+	6.01146	Vps33b_P1	protein_coding	P1
chr1	142087176	142087257	+	5.79877	Prc1_P1	protein_coding	P1
chr1	142093479	142093482	+	0.458976	Prc1_P2	protein_coding	P2
chr1	142136385	142136625	+	53.3755	Hddc3_P1	protein_coding	P1
chr1	142136836	142136915	+	3.08969	Hddc3_P3	protein_coding	P3
chr1	142137036	142137212	+	5.94429	Hddc3_P2	protein_coding	P2
chr1	142679769	142679843	+	3.20723	Zscan2_P1	protein_coding	P1
chr1	142817516	142817520	+	3.23522	chr1:142817516:142817520:+_P1	.	UN
chr1	142882966	142883086	+	78.3225	Alpk3_P1	protein_coding	P1
chr1	142905846	142905935	+	8.17201	Alpk3_P2	protein_coding	P2
chr1	142906573	142906676	+	1.29857	Alpk3_P3	protein_coding	P3
chr1	142907152	142907154	+	0.53174	Alpk3_P5	protein_coding	P5
chr1	142918140	142918236	+	0.772422	Alpk3_P4	protein_coding	P4
chr1	143035582	143035714	+	4.98157	Pde8a_P2	protein_coding	P2
chr1	143035948	143036021	+	5.39017	Pde8a_P1	protein_coding	P1
chr1	143162521	143162544	+	0.694061	chr1:143162521:143162544:+_P1	.	UN
chr1	143354041	143354155	+	8.69815	chr1:143354041:143354155:+_P1	.	UN
chr1	143359033	143359037	+	0.363822	chr1:143359033:143359037:+_P1	.	UN
chr1	143401958	143402042	+	3.85092	Whamm_P1	protein_coding	P1
chr1	143583626	143583740	+	19.0699	Ramac_P1	protein_coding	P1
chr1	143646564	143646675	+	6.50402	chr1:143646564:143646675:+_P1	.	UN
chr1	143675695	143676117	+	11.1665	Tm6sf1_P1	protein_coding	P1
chr1	143679520	143679594	+	0.492559	Tm6sf1_P3	protein_coding	P3
chr1	143679826	143679943	+	4.16436	Tm6sf1_P2	protein_coding	P2
chr1	143718166	143718210	+	1.8471	chr1:143718166:143718210:+_P1	.	UN
chr1	144238691	144238760	+	1.08587	Adamtsl3_P2	protein_coding	P2
chr1	144238944	144239040	+	3.02252	Adamtsl3_P1	protein_coding	P1
chr1	144601393	144601454	+	6.88464	Efl1_P1	protein_coding	P1
chr1	144831482	144831539	+	1.8415	Mex3b_P1	protein_coding	P1
chr1	145770097	145770183	+	5.43494	Stard5_P1	protein_coding	P1
chr1	146029916	146029985	+	3.81174	chr1:146029916:146029985:+_P1	.	UN
chr1	146030102	146030265	+	1.52246	chr1:146030102:146030265:+_P1	.	UN
chr1	146037311	146037682	+	61.4412	Mesd_P1	protein_coding	P1
chr1	146037830	146037839	+	0.397406	Mesd_P2	protein_coding	P2
chr1	146289897	146289961	+	0.671672	chr1:146289897:146289961:+_P1	.	UN
chr1	147021446	147021488	+	15.3309	F8a1_P1	protein_coding	P1
chr1	147713889	147713892	+	0.414198	Cyp2c6v1_P1	protein_coding	P1
chr1	148443522	148443538	+	1.19222	chr1:148443522:148443538:+_P1	.	UN
chr1	148449742	148450065	+	2.12696	chr1:148449742:148450065:+_P1	.	UN
chr1	148450182	148450290	+	41.4365	chr1:148450182:148450290:+_P1	.	UN
chr1	150796960	150797161	+	5.5301	Nox4_P1	protein_coding	P1
chr1	151918215	151918315	+	3.52068	Ctsc_P2	protein_coding	P2
chr1	151918444	151918791	+	97.0622	Ctsc_P1	protein_coding	P1
chr1	151935758	151935792	+	1.80792	Ctsc_P3	protein_coding	P3
chr1	152072619	152072712	+	1.47208	Rab38_P1	protein_coding	P1
chr1	153589280	153589408	+	32.8503	Fzd4_P1	protein_coding	P1
chr1	153589667	153589780	+	1.25938	Fzd4_P2	protein_coding	P2
chr1	153791097	153791150	+	0.71645	chr1:153791097:153791150:+_P1	.	UN
chr1	153861446	153862124	+	127.405	Me3_P1	protein_coding	P1
chr1	153948853	153948902	+	0.77802	Me3_P2	protein_coding	P2
chr1	154008696	154008725	+	0.380614	Me3_P4	protein_coding	P4
chr1	154052681	154052684	+	0.475767	Me3_P3	protein_coding	P3
chr1	154377151	154377545	+	55.301	Picalm_P1	protein_coding	P1
chr1	156262173	156262297	+	23.7828	Tmem126b_P1	protein_coding	P1
chr1	156282957	156283210	+	92.7859	Tmem126a_P1	protein_coding	P1
chr1	157403517	157403685	+	5.74839	Ccdc90b_P2	protein_coding	P2
chr1	157403824	157403939	+	22.876	Ccdc90b_P1	protein_coding	P1
chr1	157461647	157461711	+	2.73706	chr1:157461647:157461711:+_P1	.	UN
chr1	157573298	157573444	+	7.72422	Rab30_P1	protein_coding	P1
chr1	157592972	157593106	+	2.8602	Rab30_P2	protein_coding	P2
chr1	157646150	157646156	+	1.81351	Rab30_P3	protein_coding	P3
chr1	157701051	157701141	+	9.80641	Prcp_P1	protein_coding	P1
chr1	157846737	157846771	+	0.783617	chr1:157846737:157846771:+_P1	.	UN
chr1	157920775	157920829	+	1.39932	Fam181b_P1	protein_coding	P1
chr1	161922122	161922262	+	13.3831	Nars2_P1	protein_coding	P1
chr1	162082769	162083077	+	23.1615	Gab2_P1	protein_coding	P1
chr1	162307758	162307794	+	3.20164	chr1:162307758:162307794:+_P1	.	UN
chr1	162342022	162342081	+	3.10088	Alg8_P1	protein_coding	P1
chr1	162369694	162370000	+	701.959	Ndufc2_P1	protein_coding	P1
chr1	162375098	162375200	+	2.41802	Ndufc2_P2	protein_coding	P2
chr1	162419289	162419413	+	0.90116	Kctd14_P1	protein_coding	P1
chr1	162447664	162447753	+	10.1366	Ints4_P1	protein_coding	P1
chr1	162549580	162549624	+	20.4412	Rsf1_P1	protein_coding	P1
chr1	162676246	162676470	+	36.1919	Clns1a_P1	protein_coding	P1
chr1	163445511	163445591	+	9.6217	Lrrc32_P1	protein_coding	P1
chr1	163613361	163613456	+	1.48328	chr1:163613361:163613456:+_P1	.	UN
chr1	163663194	163663209	+	1.60641	Thap12_P2	protein_coding	P2
chr1	163663345	163663478	+	7.23167	Thap12_P1	protein_coding	P1
chr1	163793931	163793985	+	5.61965	chr1:163793931:163793985:+_P1	.	UN
chr1	163795691	163795810	+	0.772422	chr1:163795691:163795810:+_P1	.	UN
chr1	164165011	164165131	+	1.74635	chr1:164165011:164165131:+_P1	.	UN
chr1	164226726	164226789	+	2.42921	Map6_P1	protein_coding	P1
chr1	164337098	164337297	+	11.4296	chr1:164337098:164337297:+_P1	.	UN
chr1	164501876	164501902	+	0.632491	Arrb1_P2	protein_coding	P2
chr1	164502152	164502482	+	15.3645	Arrb1_P1	protein_coding	P1
chr1	165170599	165170703	+	4.58976	Lipt2_P1	protein_coding	P1
chr1	165171015	165171052	+	1.15304	Lipt2_P2	protein_coding	P2
chr1	165237537	165237598	+	0.929146	Pgm2l1_P2	protein_coding	P2
chr1	165237838	165238017	+	2.53556	Pgm2l1_P1	protein_coding	P1
chr1	165382468	165382661	+	7.64027	C2cd3_P1	protein_coding	P1
chr1	165482848	165482937	+	12.2356	Ucp3_P1	protein_coding	P1
chr1	165506308	165506472	+	252.733	Ucp2_P1	protein_coding	P1
chr1	165507250	165507402	+	4.04682	Ucp2_P4	protein_coding	P4
chr1	165509699	165509797	+	2.41802	Ucp2_P5	protein_coding	P5
chr1	165511034	165511325	+	10.8251	Ucp2_P3	protein_coding	P3
chr1	165512325	165512562	+	12.8793	Ucp2_P2	protein_coding	P2
chr1	165549277	165549398	+	17.2564	Coa4_P1	protein_coding	P1
chr1	165624809	165625225	+	53.3755	Rab6a_P1	protein_coding	P1
chr1	165625456	165625484	+	0.47017	Rab6a_P3	protein_coding	P3
chr1	165662023	165662041	+	0.47017	Rab6a_P2	protein_coding	P2
chr1	165724362	165724578	+	19.0531	Fam168a_P1	protein_coding	P1
chr1	166139832	166139860	+	1.46089	Fchsd2_P2	protein_coding	P2
chr1	166140018	166140043	+	2.40682	Fchsd2_P1	protein_coding	P1
chr1	166432683	166432771	+	6.35849	Stard10_P1	protein_coding	P1
chr1	166432911	166432973	+	0.363822	Stard10_P2	protein_coding	P2
chr1	166459042	166459106	+	5.50211	chr1:166459042:166459106:+_P1	.	UN
chr1	166490862	166491079	+	12.314	Arap1_P1	protein_coding	P1
chr1	166506855	166506951	+	10.2486	Arap1_P2	protein_coding	P2
chr1	166564646	166564858	+	17.6986	Pde2a_P1	protein_coding	P1
chr1	166574486	166574535	+	1.04109	Pde2a_P2	protein_coding	P2
chr1	166739568	166739683	+	66.9769	Clpb_P1	protein_coding	P1
chr1	166739875	166739954	+	0.878771	Clpb_P2	protein_coding	P2
chr1	166981770	166981829	+	7.53392	chr1:166981770:166981829:+_P1	.	UN
chr1	166982039	166982247	+	6.30812	Anapc15_P1	protein_coding	P1
chr1	166991375	166991564	+	89.7801	LOC100361543_P1	protein_coding	P1
chr1	166995825	166995888	+	0.794812	LOC100361543_P2	protein_coding	P2
chr1	167017260	167017461	+	14.1667	chr1:167017260:167017461:+_P1	.	UN
chr1	167044502	167044537	+	1.34334	chr1:167044502:167044537:+_P1	.	UN
chr1	167044814	167044914	+	6.15139	chr1:167044814:167044914:+_P1	.	UN
chr1	167045268	167045404	+	10.562	chr1:167045268:167045404:+_P1	.	UN
chr1	167158736	167158783	+	1.13065	chr1:167158736:167158783:+_P1	.	UN
chr1	167197546	167197551	+	1.38252	Art1_P1	protein_coding	P1
chr1	167308976	167309245	+	4.43303	Pgap2_P2	protein_coding	P2
chr1	167320742	167320808	+	6.15139	Pgap2_P1	protein_coding	P1
chr1	167373645	167373710	+	10.2262	Stim1_P1	protein_coding	P1
chr1	167538241	167538466	+	35.9512	Rrm1_P1	protein_coding	P1
chr1	167864334	167864379	+	1.18662	chr1:167864334:167864379:+_P1	.	UN
chr1	167864527	167864582	+	2.57474	chr1:167864527:167864582:+_P1	.	UN
chr1	168945489	168945695	+	35.3859	LOC100134871_P2	protein_coding	P2
chr1	168945906	168946023	+	1.04109	LOC100134871_P5	protein_coding	P5
chr1	168957319	168957934	+	722.78	LOC100134871_P1	protein_coding	P1
chr1	168958579	168958630	+	1.42171	LOC100134871_P4	protein_coding	P4
chr1	168964045	168964089	+	1.86949	LOC100134871_P3	protein_coding	P3
chr1	168972410	168972428	+	0.514948	chr1:168972410:168972428:+_P1	.	UN
chr1	169433517	169433631	+	4.34348	Trim34_P1	protein_coding	P1
chr1	170317258	170317366	+	5.3286	chr1:170317258:170317366:+_P1	.	UN
chr1	170318308	170318431	+	2.02621	chr1:170318308:170318431:+_P1	.	UN
chr1	170383577	170384075	+	145.098	Smpd1_P1	protein_coding	P1
chr1	170384527	170384583	+	1.13065	Smpd1_P3	protein_coding	P3
chr1	170384777	170384887	+	1.41611	Smpd1_P2	protein_coding	P2
chr1	170471183	170471291	+	33.9194	Dnhd1_P1	protein_coding	P1
chr1	170578805	170579200	+	87.5692	Ilk_P1	protein_coding	P1
chr1	170579334	170579437	+	1.28177	Ilk_P2	protein_coding	P2
chr1	170582566	170582609	+	1.24259	Ilk_P3	protein_coding	P3
chr1	170583039	170583060	+	0.794812	Ilk_P4	protein_coding	P4
chr1	171793781	171793802	+	6.09542	Olfml1_P2	protein_coding	P2
chr1	171793951	171794124	+	9.60491	Olfml1_P1	protein_coding	P1
chr1	171820433	171820540	+	14.8272	Ppfibp2_P1	protein_coding	P1
chr1	171888296	171888428	+	3.15126	Ppfibp2_P2	protein_coding	P2
chr1	171888716	171888787	+	1.08587	Ppfibp2_P3	protein_coding	P3
chr1	171889264	171889318	+	0.705255	Ppfibp2_P4	protein_coding	P4
chr1	173233672	173233738	+	7.90334	chr1:173233672:173233738:+_P1	.	UN
chr1	173532807	173532946	+	252.101	Eif3f_P1	protein_coding	P1
chr1	173533078	173533214	+	4.79126	Eif3f_P2	protein_coding	P2
chr1	173648662	173648736	+	16.7358	chr1:173648662:173648736:+_P1	.	UN
chr1	174132723	174132835	+	1179.42	Rpl27a_P1	protein_coding	P1
chr1	174133193	174133255	+	12.0901	Rpl27a_P2	protein_coding	P2
chr1	174133492	174133582	+	11.5136	Rpl27a_P3	protein_coding	P3
chr1	174134026	174134087	+	8.63098	Rpl27a_P4	protein_coding	P4
chr1	174330612	174331013	+	23.5533	Akip1_P1	protein_coding	P1
chr1	174334285	174334304	+	0.486962	Akip1_P2	protein_coding	P2
chr1	174378990	174379044	+	0.94034	chr1:174378990:174379044:+_P1	.	UN
chr1	174655900	174656096	+	91.2858	Ipo7_P1	protein_coding	P1
chr1	174702311	174702453	+	11.4688	Zfp143_P1	protein_coding	P1
chr1	174767695	174767812	+	3.11768	Wee1_P2	protein_coding	P2
chr1	174767923	174768009	+	2.08778	Wee1_P3	protein_coding	P3
chr1	174768160	174768448	+	5.92191	Wee1_P1	protein_coding	P1
chr1	174862645	174862759	+	22.2547	Swap70_P1	protein_coding	P1
chr1	175021822	175021943	+	3.96286	chr1:175021822:175021943:+_P1	.	UN
chr1	175445063	175445077	+	12.8569	Adm_P1	protein_coding	P1
chr1	175585911	175586205	+	25.9713	Ampd3_P1	protein_coding	P1
chr1	175609706	175609735	+	1.0243	Ampd3_P2	protein_coding	P2
chr1	175839053	175839152	+	60.2937	Ctr9_P1	protein_coding	P1
chr1	175839271	175839282	+	0.744436	Ctr9_P3	protein_coding	P3
chr1	175840343	175840353	+	1.05229	Ctr9_P2	protein_coding	P2
chr1	175895661	175895734	+	1.14744	chr1:175895661:175895734:+_P1	.	UN
chr1	175976399	175976711	+	187.738	chr1:175976399:175976711:+_P1	.	UN
chr1	175977551	175977705	+	1.00191	chr1:175977551:175977705:+_P1	.	UN
chr1	175977874	175977976	+	0.973924	chr1:175977874:175977976:+_P1	.	UN
chr1	175979746	175980029	+	5.82675	chr1:175979746:175980029:+_P1	.	UN
chr1	175980619	175980751	+	4.24832	chr1:175980619:175980751:+_P1	.	UN
chr1	175980923	175981024	+	1.67918	chr1:175980923:175981024:+_P1	.	UN
chr1	176854540	176854917	+	61.6147	Usp47_P1	protein_coding	P1
chr1	177048593	177048706	+	52.6815	Mical2_P1	protein_coding	P1
chr1	177126556	177126624	+	0.705255	Mical2_P2	protein_coding	P2
chr1	177249141	177249333	+	64.7212	Parva_P1	protein_coding	P1
chr1	177495556	177495994	+	107.854	Tead1_P1	protein_coding	P1
chr1	177552150	177552215	+	2.42362	Tead1_P2	protein_coding	P2
chr1	177569642	177569839	+	1.69597	Tead1_P3	protein_coding	P3
chr1	177574163	177574242	+	1.2202	Tead1_P4	protein_coding	P4
chr1	177709684	177709706	+	0.638088	chr1:177709684:177709706:+_P1	.	UN
chr1	177764185	177764242	+	1.03549	Rassf10_P1	protein_coding	P1
chr1	178038946	178039144	+	46.7428	Arntl_P1	protein_coding	P1
chr1	178106010	178106065	+	0.688464	Arntl_P2	protein_coding	P2
chr1	178351643	178351766	+	21.3032	Far1_P1	protein_coding	P1
chr1	178636514	178636736	+	7.75221	Spon1_P1	protein_coding	P1
chr1	181770355	181770452	+	17.122	chr1:181770355:181770452:+_P1	.	UN
chr1	183892529	183892641	+	1.77433	Pde3b_P1	protein_coding	P1
chr1	185210900	185211046	+	25.5907	Pik3c2a_P1	protein_coding	P1
chr1	185328840	185328927	+	288.869	SNORD14_P1	snoRNA	P1
chr1	185356114	185356162	+	2.21652	Plekha7_P1	protein_coding	P1
chr1	185427606	185427649	+	0.604505	Plekha7_P2	protein_coding	P2
chr1	185631011	185631321	+	5.68122	chr1:185631011:185631321:+_P1	.	UN
chr1	185631665	185631836	+	3.49269	chr1:185631665:185631836:+_P1	.	UN
chr1	185634720	185634807	+	2.91058	chr1:185634720:185634807:+_P1	.	UN
chr1	186977513	186977596	+	4.34348	chr1:186977513:186977596:+_P1	.	UN
chr1	188200359	188200370	+	1.97583	AABR07005572.2_P1	processed_pseudogene	P1
chr1	188416937	188417019	+	2.50198	chr1:188416937:188417019:+_P1	.	UN
chr1	188448577	188448625	+	18.1743	Vps35l_P1	protein_coding	P1
chr1	188451658	188451708	+	1.52805	Vps35l_P2	protein_coding	P2
chr1	189665916	189666134	+	8.76532	Lyrm1_P2	protein_coding	P2
chr1	189666260	189666398	+	11.2673	Lyrm1_P1	protein_coding	P1
chr1	189798121	189798220	+	8.55262	AABR07005596.1_P1	lincRNA	P1
chr1	189870582	189870743	+	53.4931	Tmem159_P1	protein_coding	P1
chr1	189883355	189883358	+	0.694061	Tmem159_P2	protein_coding	P2
chr1	190554839	190555468	+	886.293	Uqcrc2_P1	protein_coding	P1
chr1	190557650	190557727	+	9.53774	Uqcrc2_P3	protein_coding	P3
chr1	190557845	190557979	+	5.38457	Uqcrc2_P5	protein_coding	P5
chr1	190567045	190567171	+	6.32491	Uqcrc2_P4	protein_coding	P4
chr1	190575843	190575927	+	21.4207	Uqcrc2_P2	protein_coding	P2
chr1	190604798	190604934	+	9.25788	chr1:190604798:190604934:+_P1	.	UN
chr1	190780152	190780264	+	18.2023	Eef2k_P1	protein_coding	P1
chr1	190798739	190798773	+	0.90116	Eef2k_P2	protein_coding	P2
chr1	190852936	190853107	+	12.5043	Polr3e_P1	protein_coding	P1
chr1	190964651	190965035	+	50.8791	Mettl9_P1	protein_coding	P1
chr1	192025432	192025772	+	53.8121	Ubfd1_P1	protein_coding	P1
chr1	192026085	192026136	+	0.626894	Ubfd1_P2	protein_coding	P2
chr1	192088634	192088753	+	29.7495	Dctn5_P1	protein_coding	P1
chr1	192115965	192116071	+	1.90867	Plk1_P1	protein_coding	P1
chr1	192169811	192169896	+	0.744436	Chp2_P2	protein_coding	P2
chr1	192170017	192170102	+	2.36764	Chp2_P1	protein_coding	P1
chr1	192233650	192233729	+	4.39385	Prkcb_P1	protein_coding	P1
chr1	192932643	192932863	+	41.7556	Rbbp6_P1	protein_coding	P1
chr1	193076132	193076225	+	4.13638	Tnrc6a_P2	protein_coding	P2
chr1	193076402	193076504	+	25.6019	Tnrc6a_P1	protein_coding	P1
chr1	193144350	193144385	+	0.744436	Tnrc6a_P3	protein_coding	P3
chr1	193335605	193335718	+	13.176	Lcmt1_P1	protein_coding	P1
chr1	193354836	193354843	+	0.464573	Lcmt1_P2	protein_coding	P2
chr1	196833751	196834090	+	7.27644	chr1:196833751:196834090:+_P1	.	UN
chr1	196839228	196839365	+	9.76163	Kdm8_P1	protein_coding	P1
chr1	196839510	196839560	+	1.83031	Kdm8_P2	protein_coding	P2
chr1	196883943	196883962	+	0.47017	chr1:196883943:196883962:+_P1	.	UN
chr1	196942317	196942432	+	26.6486	Il4r_P1	protein_coding	P1
chr1	196954754	196954785	+	0.526143	Il4r_P2	protein_coding	P2
chr1	196956175	196956193	+	0.481365	Il4r_P3	protein_coding	P3
chr1	196996521	196996579	+	0.973924	Il21r_P1	protein_coding	P1
chr1	197098852	197098919	+	3.80054	LOC361646_P1	protein_coding	P1
chr1	197110514	197110570	+	1.67918	LOC361646_P2	protein_coding	P2
chr1	197636189	197636372	+	15.5268	chr1:197636189:197636372:+_P1	.	UN
chr1	197839171	197839291	+	0.750033	Rabep2_P3	protein_coding	P3
chr1	197839546	197839618	+	5.94989	Rabep2_P1	protein_coding	P1
chr1	197839924	197840005	+	2.82102	Rabep2_P2	protein_coding	P2
chr1	197903647	197903963	+	222.172	Tufm_P1	protein_coding	P1
chr1	197904074	197904267	+	2.79863	Tufm_P2	protein_coding	P2
chr1	197904739	197904815	+	1.20341	Tufm_P4	protein_coding	P4
chr1	197906054	197906077	+	1.25379	Tufm_P3	protein_coding	P3
chr1	197906288	197906314	+	1.0243	Tufm_P5	protein_coding	P5
chr1	197982725	197982773	+	0.800409	chr1:197982725:197982773:+_P1	.	UN
chr1	197999276	197999367	+	7.85856	Apobr_P1	protein_coding	P1
chr1	198002443	198002535	+	0.990716	Apobr_P2	protein_coding	P2
chr1	198067038	198067126	+	12.4539	Sgf29_P1	protein_coding	P1
chr1	198099470	198099529	+	0.744436	Sgf29_P2	protein_coding	P2
chr1	198119699	198119732	+	1.30416	Bola2_P2	protein_coding	P2
chr1	198120188	198120364	+	177.825	Bola2_P1	protein_coding	P1
chr1	198120505	198120538	+	0.570921	Bola2_P3	protein_coding	P3
chr1	198192695	198192960	+	80.304	Mapk3_P1	protein_coding	P1
chr1	198195976	198196081	+	2.18853	Mapk3_P2	protein_coding	P2
chr1	198196296	198196344	+	0.537337	Mapk3_P3	protein_coding	P3
chr1	198210475	198210593	+	66.8201	Ypel3_P1	protein_coding	P1
chr1	198213598	198213617	+	0.71645	Ypel3_P2	protein_coding	P2
chr1	198230762	198230820	+	3.62703	chr1:198230762:198230820:+_P1	.	UN
chr1	198298115	198298197	+	0.559726	Hirip3_P2	protein_coding	P2
chr1	198298596	198298640	+	20.458	Hirip3_P1	protein_coding	P1
chr1	198334682	198334713	+	1.0187	chr1:198334682:198334713:+_P1	.	UN
chr1	198360587	198360653	+	3.87331	Kctd13_P1	protein_coding	P1
chr1	198383564	198383676	+	6.62716	Sez6l2_P1	protein_coding	P1
chr1	198409323	198409707	+	44.6102	Cdipt_P1	protein_coding	P1
chr1	198459630	198459697	+	0.643685	chr1:198459630:198459697:+_P1	.	UN
chr1	198528556	198528673	+	2.13816	LOC308990_P1	protein_coding	P1
chr1	198680670	198680783	+	10.5061	chr1:198680670:198680783:+_P1	.	UN
chr1	198690289	198690394	+	26.1	Zfp771_P1	protein_coding	P1
chr1	198690764	198690883	+	1.06908	Zfp771_P2	protein_coding	P2
chr1	198744094	198744238	+	2.2557	Itgal_P1	protein_coding	P1
chr1	198757988	198758048	+	0.71645	Itgal_P2	protein_coding	P2
chr1	198899881	198899946	+	0.638088	chr1:198899881:198899946:+_P1	.	UN
chr1	198910956	198911298	+	6.85105	AABR07005779.1_P2	protein_coding	P2
chr1	198911423	198911611	+	7.17569	AABR07005779.1_P1	protein_coding	P1
chr1	198925578	198925726	+	7.74661	chr1:198925578:198925726:+_P1	.	UN
chr1	198925937	198926034	+	0.923549	chr1:198925937:198926034:+_P1	.	UN
chr1	198926273	198926598	+	9.14033	chr1:198926273:198926598:+_P1	.	UN
chr1	198926899	198926901	+	1.08587	chr1:198926899:198926901:+_P1	.	UN
chr1	198958432	198958595	+	26.4751	chr1:198958432:198958595:+_P1	.	UN
chr1	198958756	198959104	+	8.03767	chr1:198958756:198959104:+_P1	.	UN
chr1	199004625	199004942	+	6.23535	Srcap_P1	protein_coding	P1
chr1	199019282	199019427	+	5.98348	Phkg2_P2	protein_coding	P2
chr1	199019538	199019660	+	6.5432	Phkg2_P1	protein_coding	P1
chr1	199037471	199037548	+	32.6768	Rnf40_P1	protein_coding	P1
chr1	199052422	199052432	+	0.514948	chr1:199052422:199052432:+_P1	.	UN
chr1	199163039	199163150	+	4.32669	Ctf1_P1	protein_coding	P1
chr1	199163279	199163326	+	0.962729	Ctf1_P2	protein_coding	P2
chr1	199195230	199195289	+	0.923549	Fbxl19_P1	protein_coding	P1
chr1	199217456	199217576	+	24.0514	Orai3_P1	protein_coding	P1
chr1	199224359	199224406	+	0.783617	Setd1a_P2	protein_coding	P2
chr1	199224575	199224699	+	17.0549	Setd1a_P1	protein_coding	P1
chr1	199248448	199248548	+	7.10853	Hsd3b7_P1	protein_coding	P1
chr1	199287361	199287954	+	93.1553	Stx4_P1	protein_coding	P1
chr1	199288147	199288238	+	5.3286	Stx4_P2	protein_coding	P2
chr1	199320804	199320838	+	2.32846	chr1:199320804:199320838:+_P1	.	UN
chr1	199321210	199321329	+	3.45351	chr1:199321210:199321329:+_P1	.	UN
chr1	199321976	199322045	+	1.90307	chr1:199321976:199322045:+_P1	.	UN
chr1	199351589	199351938	+	87.614	Bckdk_P1	protein_coding	P1
chr1	199352289	199352360	+	2.4516	Bckdk_P2	protein_coding	P2
chr1	199352486	199352550	+	2.01502	Bckdk_P3	protein_coding	P3
chr1	199352922	199352971	+	0.800409	Bckdk_P5	protein_coding	P5
chr1	199353392	199353492	+	1.44969	Bckdk_P4	protein_coding	P4
chr1	199360625	199360791	+	5.83235	Kat8_P1	protein_coding	P1
chr1	199362892	199362920	+	0.30785	Kat8_P2	protein_coding	P2
chr1	199412808	199412904	+	77.6285	Fus_P1	protein_coding	P1
chr1	199414908	199414959	+	1.97583	Fus_P2	protein_coding	P2
chr1	199417130	199417280	+	1.56723	Fus_P3	protein_coding	P3
chr1	199417594	199417731	+	1.37693	Fus_P4	protein_coding	P4
chr1	199424681	199424799	+	0.923549	Fus_P5	protein_coding	P5
chr1	199449889	199450067	+	204.664	Trim72_P1	protein_coding	P1
chr1	199450687	199450829	+	3.52068	Trim72_P3	protein_coding	P3
chr1	199454092	199454243	+	3.24641	Trim72_P4	protein_coding	P4
chr1	199456649	199456753	+	0.912354	Trim72_P5	protein_coding	P5
chr1	199457074	199457416	+	9.63849	Trim72_P2	protein_coding	P2
chr1	199495321	199495423	+	2.78744	Itgad_P1	protein_coding	P1
chr1	199555835	199555892	+	1.91426	Itgad_P2	protein_coding	P2
chr1	199624297	199624349	+	0.458976	chr1:199624297:199624349:+_P1	.	UN
chr1	199654982	199655084	+	1.89188	Armc5_P2	protein_coding	P2
chr1	199655239	199655304	+	0.71645	Armc5_P3	protein_coding	P3
chr1	199655808	199655853	+	5.66443	Armc5_P1	protein_coding	P1
chr1	199663955	199664208	+	39.0969	Tgfb1i1_P1	protein_coding	P1
chr1	199664901	199664904	+	0.604505	Tgfb1i1_P2	protein_coding	P2
chr1	199720051	199720158	+	8.86607	Ahsp_P1	protein_coding	P1
chr1	199879324	199879377	+	0.626894	chr1:199879324:199879377:+_P1	.	UN
chr1	199941038	199941540	+	219.799	Bag3_P1	protein_coding	P1
chr1	199958088	199958417	+	22.5962	Bag3_P2	protein_coding	P2
chr1	199959912	199960047	+	16.2489	Bag3_P3	protein_coding	P3
chr1	199960159	199960266	+	3.03931	Bag3_P4	protein_coding	P4
chr1	199964238	199964304	+	0.610102	Bag3_P5	protein_coding	P5
chr1	200037772	200037953	+	5.80436	Inpp5f_P1	protein_coding	P1
chr1	200167057	200167263	+	30.1972	Sec23ip_P1	protein_coding	P1
chr1	201117731	201117879	+	48.3436	Tacc2_P1	protein_coding	P1
chr1	201159626	201159697	+	6.20737	Tacc2_P3	protein_coding	P3
chr1	201184904	201184960	+	1.15304	Tacc2_P5	protein_coding	P5
chr1	201209137	201209272	+	1.79672	Tacc2_P4	protein_coding	P4
chr1	201209386	201209507	+	9.58252	Tacc2_P2	protein_coding	P2
chr1	201429687	201429866	+	35.7777	Plekha1_P1	protein_coding	P1
chr1	201498951	201499101	+	30.4211	Htra1_P1	protein_coding	P1
chr1	201523854	201523882	+	0.520546	Htra1_P3	protein_coding	P3
chr1	201544642	201544677	+	0.520546	Htra1_P2	protein_coding	P2
chr1	201950105	201950330	+	38.7611	Pstk_P1	protein_coding	P1
chr1	201953137	201953225	+	0.414198	Pstk_P2	protein_coding	P2
chr1	201981321	201981476	+	40.4346	Acadsb_P1	protein_coding	P1
chr1	202771018	202771164	+	24.2362	Wdr11_P1	protein_coding	P1
chr1	203100437	203100439	+	0.391809	chr1:203100437:203100439:+_P1	.	UN
chr1	203526821	203526890	+	28.4621	Bub3_P1	protein_coding	P1
chr1	204617787	204617859	+	5.42375	Lhpp_P1	protein_coding	P1
chr1	204861759	204861793	+	25.4004	Abraxas2_P1	protein_coding	P1
chr1	204938100	204938490	+	20.7043	chr1:204938100:204938490:+_P1	.	UN
chr1	205248786	205248841	+	0.973924	chr1:205248786:205248841:+_P1	.	UN
chr1	205706539	205706636	+	9.2131	Edrf1_P1	protein_coding	P1
chr1	205776960	205777018	+	0.973924	Bccip_P2	protein_coding	P2
chr1	205777454	205777603	+	69.4565	Bccip_P1	protein_coding	P1
chr1	206900567	206900646	+	30.1581	Dock1_P1	protein_coding	P1
chr1	207892126	207892174	+	0.65488	Ptpre_P2	protein_coding	P2
chr1	207955010	207955040	+	0.794812	Ptpre_P1	protein_coding	P1
chr1	209237088	209237284	+	6.05064	Mgmt_P1	protein_coding	P1
chr1	209768613	209768757	+	143.631	Glrx3_P1	protein_coding	P1
chr1	209786480	209786549	+	1.10266	Glrx3_P2	protein_coding	P2
chr1	209792146	209792231	+	1.05229	Glrx3_P3	protein_coding	P3
chr1	210992308	210992400	+	1.15304	chr1:210992308:210992400:+_P1	.	UN
chr1	211205819	211205931	+	29.7383	Ppp2r2d_P1	protein_coding	P1
chr1	211206054	211206144	+	1.18102	Ppp2r2d_P2	protein_coding	P2
chr1	211272023	211272522	+	24.0347	chr1:211272023:211272522:+_P1	.	UN
chr1	211543718	211543796	+	3.36396	Lrrc27_P2	protein_coding	P2
chr1	211560526	211560767	+	34.2497	Lrrc27_P1	protein_coding	P1
chr1	211561662	211561724	+	0.800409	Lrrc27_P3	protein_coding	P3
chr1	211581994	211582100	+	11.3009	Pwwp2b_P1	protein_coding	P1
chr1	211705918	211705979	+	1.04109	chr1:211705918:211705979:+_P1	.	UN
chr1	211732379	211732559	+	280.664	Inpp5a_P1	protein_coding	P1
chr1	211732703	211732812	+	1.70717	Inpp5a_P2	protein_coding	P2
chr1	212146363	212146416	+	0.65488	AABR07005985.3_P1	lincRNA	P1
chr1	212359309	212359372	+	9.409	Zfp511_P1	protein_coding	P1
chr1	212594823	212594890	+	9.21869	Paox_P1	protein_coding	P1
chr1	212606740	212606855	+	27.8464	Mtg1_P1	protein_coding	P1
chr1	213511812	213511880	+	3.64382	Cyp2e1_P1	protein_coding	P1
chr1	213577413	213577417	+	0.526143	RGD1309350_P1	protein_coding	P1
chr1	213595254	213595260	+	1.79672	Scgb1c1_P1	protein_coding	P1
chr1	213605694	213605867	+	3.90129	Ric8a_P2	protein_coding	P2
chr1	213606709	213606844	+	32.0891	Ric8a_P1	protein_coding	P1
chr1	213635639	213635738	+	1.94785	Psmd13_P2	protein_coding	P2
chr1	213636070	213636177	+	46.6868	Psmd13_P1	protein_coding	P1
chr1	213640032	213640062	+	0.559726	Psmd13_P3	protein_coding	P3
chr1	213734574	213734666	+	5.22225	chr1:213734574:213734666:+_P1	.	UN
chr1	213765798	213766052	+	36.6229	Ifitm1_P1	protein_coding	P1
chr1	213766531	213766632	+	2.0486	Ifitm1_P3	protein_coding	P3
chr1	213766797	213766883	+	2.93856	Ifitm1_P2	protein_coding	P2
chr1	214122940	214123170	+	37.3226	Ptdss2_P1	protein_coding	P1
chr1	214181825	214181932	+	2.16614	Lrrc56_P1	protein_coding	P1
chr1	214215685	214215738	+	0.917951	Phrf1_P2	protein_coding	P2
chr1	214215949	214216057	+	28.0311	Phrf1_P1	protein_coding	P1
chr1	214255187	214255274	+	1.19222	chr1:214255187:214255274:+_P1	.	UN
chr1	214278395	214278426	+	2.19413	Drd4_P1	protein_coding	P1
chr1	214317913	214318034	+	23.9395	Tmem80_P1	protein_coding	P1
chr1	214375504	214375619	+	135.773	Taldo1_P1	protein_coding	P1
chr1	214379566	214379600	+	0.889965	Taldo1_P3	protein_coding	P3
chr1	214381301	214381305	+	0.845187	Taldo1_P4	protein_coding	P4
chr1	214384462	214384506	+	0.766825	Taldo1_P5	protein_coding	P5
chr1	214384712	214384715	+	1.62321	Taldo1_P2	protein_coding	P2
chr1	215602189	215602235	+	0.727644	chr1:215602189:215602235:+_P1	.	UN
chr1	215628756	215628822	+	4.16996	Lsp1_P4	protein_coding	P4
chr1	215639298	215639534	+	5.40136	Lsp1_P3	protein_coding	P3
chr1	215639708	215639816	+	9.36982	Lsp1_P1	protein_coding	P1
chr1	215639917	215640103	+	2.40123	Lsp1_P5	protein_coding	P5
chr1	215642677	215642944	+	8.49105	Lsp1_P2	protein_coding	P2
chr1	215701484	215701576	+	122.558	Mrpl23_P1	protein_coding	P1
chr1	215709094	215709100	+	0.34703	Mrpl23_P2	protein_coding	P2
chr1	216237633	216237930	+	432.814	Cd81_P1	protein_coding	P1
chr1	216250797	216250871	+	0.727644	Cd81_P5	protein_coding	P5
chr1	216251488	216251600	+	8.81009	Cd81_P2	protein_coding	P2
chr1	216251838	216251928	+	2.08778	Cd81_P4	protein_coding	P4
chr1	216252878	216253165	+	7.08054	Cd81_P3	protein_coding	P3
chr1	216254865	216255002	+	12.1685	Tssc4_P1	protein_coding	P1
chr1	216293005	216293298	+	68.3818	Kcnq1_P1	protein_coding	P1
chr1	216378744	216378773	+	0.65488	Kcnq1_P2	protein_coding	P2
chr1	216676342	216676411	+	4.01324	Slc22a18_P1	protein_coding	P1
chr1	217019023	217019083	+	1.29857	Dhcr7_P1	protein_coding	P1
chr1	218076010	218076095	+	4.72409	Lto1_P1	protein_coding	P1
chr1	218466670	218466856	+	5.5189	Mrgprf_P1	protein_coding	P1
chr1	218532160	218532207	+	65.2137	Mrpl21_P1	protein_coding	P1
chr1	218536770	218536930	+	3.80054	Mrpl21_P2	protein_coding	P2
chr1	218567209	218567241	+	1.05788	chr1:218567209:218567241:+_P1	.	UN
chr1	218568146	218568261	+	13.9036	chr1:218568146:218568261:+_P1	.	UN
chr1	218607580	218607628	+	0.738839	Cpt1a_P1	protein_coding	P1
chr1	218945458	218945569	+	7.31003	RGD1311946_P1	protein_coding	P1
chr1	219000790	219000864	+	0.598907	Kmt5b_P3	protein_coding	P3
chr1	219001264	219001743	+	40.5802	Kmt5b_P1	protein_coding	P1
chr1	219018637	219018689	+	0.800409	Kmt5b_P2	protein_coding	P2
chr1	219077725	219077788	+	6.20737	Chka_P1	protein_coding	P1
chr1	219172980	219173114	+	7.00218	Unc93b1_P1	protein_coding	P1
chr1	219233733	219233799	+	2.00942	Acy3_P1	protein_coding	P1
chr1	219247551	219247908	+	347.389	Nudt8_P1	protein_coding	P1
chr1	219248239	219248387	+	28.2046	Nudt8_P2	protein_coding	P2
chr1	219248675	219248744	+	2.63071	Nudt8_P4	protein_coding	P4
chr1	219248845	219248930	+	6.66634	Nudt8_P3	protein_coding	P3
chr1	219250118	219250293	+	30.0069	Doc2g_P1	protein_coding	P1
chr1	219345984	219346183	+	48.7578	Cdk2ap2_P1	protein_coding	P1
chr1	219348658	219348756	+	15.8682	Pitpnm1_P1	protein_coding	P1
chr1	219373930	219374212	+	119.753	Tmem134_P1	protein_coding	P1
chr1	219375145	219375194	+	0.677269	Tmem134_P4	protein_coding	P4
chr1	219375612	219375626	+	1.17543	Tmem134_P3	protein_coding	P3
chr1	219375828	219375877	+	2.00942	Tmem134_P2	protein_coding	P2
chr1	219379232	219379243	+	0.621296	Tmem134_P5	protein_coding	P5
chr1	219397821	219397951	+	39.2704	Coro1b_P1	protein_coding	P1
chr1	219403926	219403976	+	3.97965	Ptprcap_P1	protein_coding	P1
chr1	219439830	219440048	+	260.082	Ppp1ca_P1	protein_coding	P1
chr1	219440798	219440961	+	6.10662	Ppp1ca_P2	protein_coding	P2
chr1	219442700	219442784	+	1.25938	Ppp1ca_P5	protein_coding	P5
chr1	219442929	219443006	+	2.4516	Ppp1ca_P3	protein_coding	P3
chr1	219443139	219443214	+	1.89188	Ppp1ca_P4	protein_coding	P4
chr1	219481468	219481797	+	27.6505	Pold4_P1	protein_coding	P1
chr1	219482067	219482150	+	0.968327	Pold4_P2	protein_coding	P2
chr1	219759140	219759213	+	14.2842	Pc_P1	protein_coding	P1
chr1	219863973	219864051	+	1.8415	chr1:219863973:219864051:+_P1	.	UN
chr1	220009335	220009482	+	19.9207	Rbm4b_P1	protein_coding	P1
chr1	220067275	220067373	+	1.8415	chr1:220067275:220067373:+_P1	.	UN
chr1	220114119	220114257	+	55.5864	Ctsf_P1	protein_coding	P1
chr1	220114435	220114476	+	1.10826	Ctsf_P2	protein_coding	P2
chr1	220137227	220137295	+	2.14935	Zdhhc24_P1	protein_coding	P1
chr1	220243445	220243664	+	134.441	mrpl11_P1	protein_coding	P1
chr1	220469985	220470223	+	108.43	Yif1a_P1	protein_coding	P1
chr1	220668452	220668557	+	24.0962	Gal3st3_P1	protein_coding	P1
chr1	220746340	220746613	+	13.2207	Eif1ad_P1	protein_coding	P1
chr1	220771209	220771293	+	2.54116	chr1:220771209:220771293:+_P1	.	UN
chr1	220805117	220805127	+	0.649283	chr1:220805117:220805127:+_P1	.	UN
chr1	220806599	220806764	+	35.0613	Bles03_P1	protein_coding	P1
chr1	220808134	220808152	+	0.4086	Bles03_P2	protein_coding	P2
chr1	220840072	220840158	+	14.5193	Fibp_P1	protein_coding	P1
chr1	220854342	220854651	+	3.01693	Efemp2_P1	protein_coding	P1
chr1	220867990	220868157	+	2.17174	chr1:220867990:220868157:+_P1	.	UN
chr1	220869735	220869878	+	404.951	Cfl1_P1	protein_coding	P1
chr1	220871877	220872044	+	12.4595	Cfl1_P3	protein_coding	P3
chr1	220872779	220873125	+	30.7906	Cfl1_P2	protein_coding	P2
chr1	220890953	220891089	+	6.57679	chr1:220890953:220891089:+_P1	.	UN
chr1	220948299	220948379	+	3.33037	Ap5b1_P1	protein_coding	P1
chr1	220966609	220966688	+	9.63849	Rnaseh2c_P1	protein_coding	P1
chr1	220967006	220967032	+	1.36573	Rnaseh2c_P2	protein_coding	P2
chr1	220992427	220992840	+	57.8869	Rela_P1	protein_coding	P1
chr1	220993543	220993654	+	2.67549	Rela_P2	protein_coding	P2
chr1	221042972	221043122	+	14.3682	Map3k11_P1	protein_coding	P1
chr1	221099758	221100031	+	16.4783	Ltbp3_P1	protein_coding	P1
chr1	221100327	221100428	+	0.77802	Ltbp3_P2	protein_coding	P2
chr1	221158119	221158263	+	13.3215	chr1:221158119:221158263:+_P1	.	UN
chr1	221179802	221179878	+	4.40505	chr1:221179802:221179878:+_P1	.	UN
chr1	221236755	221236823	+	0.951535	Slc25a45_P1	protein_coding	P1
chr1	221243021	221243063	+	0.710853	Slc25a45_P2	protein_coding	P2
chr1	221281358	221281394	+	0.570921	chr1:221281358:221281394:+_P1	.	UN
chr1	221409672	221409784	+	24.7287	Syvn1_P1	protein_coding	P1
chr1	221420213	221420374	+	713.321	Fau_P1	protein_coding	P1
chr1	221420498	221420692	+	4.74648	Fau_P3	protein_coding	P3
chr1	221420797	221420938	+	21.5159	Fau_P2	protein_coding	P2
chr1	221421432	221421479	+	3.57105	Fau_P4	protein_coding	P4
chr1	221424359	221424449	+	5.07112	Znhit2_P1	protein_coding	P1
chr1	221448649	221448755	+	0.968327	Cdca5_P1	protein_coding	P1
chr1	221612581	221612711	+	9.2075	Atg2a_P1	protein_coding	P1
chr1	221644638	221645313	+	161.705	Ehd1_P1	protein_coding	P1
chr1	221661546	221661606	+	1.14184	Ehd1_P3	protein_coding	P3
chr1	221665349	221665411	+	1.25938	Ehd1_P2	protein_coding	P2
chr1	221704417	221704558	+	10.0695	Men1_P1	protein_coding	P1
chr1	221710557	221710959	+	14.7936	Map4k2_P1	protein_coding	P1
chr1	221735462	221735930	+	115.483	Sf1_P1	protein_coding	P1
chr1	221737511	221737631	+	2.12696	Sf1_P2	protein_coding	P2
chr1	221743037	221743115	+	1.98703	Sf1_P3	protein_coding	P3
chr1	221756230	221756612	+	773.654	Pygm_P1	protein_coding	P1
chr1	221757623	221758062	+	5.77078	Pygm_P2	protein_coding	P2
chr1	221758329	221758456	+	4.72969	Pygm_P4	protein_coding	P4
chr1	221760025	221760294	+	4.83044	Pygm_P3	protein_coding	P3
chr1	221761681	221761806	+	3.97406	Pygm_P5	protein_coding	P5
chr1	221772512	221772594	+	3.91249	Rasgrp2_P1	protein_coding	P1
chr1	221774003	221774060	+	2.08778	Rasgrp2_P2	protein_coding	P2
chr1	221774395	221774477	+	1.18102	Rasgrp2_P3	protein_coding	P3
chr1	221817608	221817673	+	3.08969	Nrxn2_P1	protein_coding	P1
chr1	221872002	221872047	+	1.00751	Nrxn2_P2	protein_coding	P2
chr1	221872197	221872244	+	0.71645	Nrxn2_P3	protein_coding	P3
chr1	222167875	222168008	+	126.006	Trmt112_P1	protein_coding	P1
chr1	222168119	222168216	+	1.38252	Trmt112_P3	protein_coding	P3
chr1	222168326	222168384	+	1.57283	Trmt112_P2	protein_coding	P2
chr1	222168502	222168518	+	0.554129	Trmt112_P4	protein_coding	P4
chr1	222179198	222179244	+	1.0131	chr1:222179198:222179244:+_P1	.	UN
chr1	222198077	222198159	+	7.41638	Bad_P2	protein_coding	P2
chr1	222198705	222198822	+	12.3196	Bad_P1	protein_coding	P1
chr1	222229198	222229276	+	2.88259	Ppp1r14b_P2	protein_coding	P2
chr1	222229745	222230088	+	49.3903	Ppp1r14b_P1	protein_coding	P1
chr1	222231168	222231222	+	1.40491	Ppp1r14b_P3	protein_coding	P3
chr1	222240600	222240628	+	0.436587	chr1:222240600:222240628:+_P1	.	UN
chr1	222251011	222251209	+	5.69242	Trpt1_P1	protein_coding	P1
chr1	222293602	222293669	+	0.677269	chr1:222293602:222293669:+_P1	.	UN
chr1	222310883	222311345	+	301.67	Macrod1_P1	protein_coding	P1
chr1	222318753	222318841	+	11.0714	Macrod1_P3	protein_coding	P3
chr1	222449788	222449888	+	2.74826	Macrod1_P5	protein_coding	P5
chr1	222450259	222450491	+	30.8185	Macrod1_P2	protein_coding	P2
chr1	222450607	222450679	+	11.0154	Macrod1_P4	protein_coding	P4
chr1	222517944	222518066	+	7.25965	chr1:222517944:222518066:+_P1	.	UN
chr1	222518826	222519112	+	17.4691	Rcor2_P1	protein_coding	P1
chr1	222669264	222669267	+	0.615699	chr1:222669264:222669267:+_P1	.	UN
chr1	222746389	222746575	+	19.2546	Atl3_P1	protein_coding	P1
chr1	222844107	222844434	+	90.5525	Pla2g16_P1	protein_coding	P1
chr1	222869422	222869636	+	9.18511	Pla2g16_P2	protein_coding	P2
chr1	224921251	224921326	+	8.73733	SNORD25_P1	snoRNA	P1
chr1	224924325	224924353	+	0.570921	chr1:224924325:224924353:+_P1	.	UN
chr1	224933914	224933954	+	8.15521	Wdr74_P1	protein_coding	P1
chr1	224939446	224939553	+	14.0267	Stx5_P1	protein_coding	P1
chr1	224939825	224939889	+	1.70717	Stx5_P2	protein_coding	P2
chr1	224957424	224957617	+	37.8543	Nxf1_P1	protein_coding	P1
chr1	224970774	224970914	+	43.6363	Tmem223_P1	protein_coding	P1
chr1	224971040	224971116	+	1.08587	Tmem223_P2	protein_coding	P2
chr1	225015477	225015563	+	36.5222	Hnrnpul2_P2	protein_coding	P2
chr1	225015703	225016333	+	72.5405	Hnrnpul2_P1	protein_coding	P1
chr1	225018535	225018579	+	1.39932	Hnrnpul2_P3	protein_coding	P3
chr1	225033861	225034200	+	11.6927	chr1:225033861:225034200:+_P1	.	UN
chr1	225036990	225037060	+	4.58976	Bscl2_P1	protein_coding	P1
chr1	225067959	225068233	+	124.729	Ubxn1_P1	protein_coding	P1
chr1	225068475	225068569	+	2.22771	Ubxn1_P4	protein_coding	P4
chr1	225068681	225068751	+	3.45351	Ubxn1_P3	protein_coding	P3
chr1	225069764	225069867	+	11.1386	Ubxn1_P2	protein_coding	P2
chr1	225085272	225085370	+	30.4659	RGD1597339_P1	protein_coding	P1
chr1	225085586	225085652	+	1.6456	RGD1597339_P2	protein_coding	P2
chr1	225091592	225091656	+	8.44627	Ints5_P1	protein_coding	P1
chr1	225096554	225096626	+	39.7574	Ganab_P1	protein_coding	P1
chr1	225100620	225100634	+	0.570921	Ganab_P3	protein_coding	P3
chr1	225115711	225115714	+	0.800409	Ganab_P2	protein_coding	P2
chr1	225120025	225120234	+	31.4734	B3gat3_P1	protein_coding	P1
chr1	225128758	225129071	+	7.53952	Eml3_P1	protein_coding	P1
chr1	225140717	225141051	+	43.8546	Mta2_P1	protein_coding	P1
chr1	225141166	225141269	+	2.35085	Mta2_P2	protein_coding	P2
chr1	225151372	225151470	+	6.1458	Tut1_P1	protein_coding	P1
chr1	225163181	225163402	+	570.182	Eef1g_P1	protein_coding	P1
chr1	225165377	225165438	+	5.83795	Eef1g_P4	protein_coding	P4
chr1	225165579	225165711	+	7.50593	Eef1g_P3	protein_coding	P3
chr1	225166060	225166194	+	22.8928	Eef1g_P2	protein_coding	P2
chr1	225168521	225168647	+	5.80996	Eef1g_P5	protein_coding	P5
chr1	225184847	225185063	+	252.884	Ahnak_P1	protein_coding	P1
chr1	225195372	225195459	+	6.18498	Ahnak_P4	protein_coding	P4
chr1	225196382	225196541	+	6.61037	Ahnak_P3	protein_coding	P3
chr1	225198832	225198850	+	3.77815	Ahnak_P5	protein_coding	P5
chr1	225214059	225214455	+	10.1702	Ahnak_P2	protein_coding	P2
chr1	226030788	226031178	+	3017.5	Fth1_P1	protein_coding	P1
chr1	226032299	226032445	+	116.294	Fth1_P2	protein_coding	P2
chr1	226032693	226032810	+	15.6835	Fth1_P3	protein_coding	P3
chr1	226032914	226033031	+	1.57283	Fth1_P4	protein_coding	P4
chr1	226066727	226066872	+	10.993	chr1:226066727:226066872:+_P1	.	UN
chr1	226091600	226091926	+	88.7446	Fads3_P1	protein_coding	P1
chr1	226233993	226234183	+	11.0378	Fads1_P1	protein_coding	P1
chr1	226256148	226256225	+	88.4983	chr1:226256148:226256225:+_P1	.	UN
chr1	226258415	226258432	+	0.4086	AABR07006258.2_P1	protein_coding	P1
chr1	226435587	226436107	+	38.0614	Syt7_P1	protein_coding	P1
chr1	226462941	226463084	+	8.52463	Syt7_P2	protein_coding	P2
chr1	226463296	226463347	+	1.58403	Syt7_P3	protein_coding	P3
chr1	226572425	226572553	+	12.8849	Cpsf7_P1	protein_coding	P1
chr1	226582952	226582970	+	0.632491	Cpsf7_P2	protein_coding	P2
chr1	226630932	226631045	+	9.0116	chr1:226630932:226631045:+_P1	.	UN
chr1	226657485	226657781	+	109.964	Ddb1_P1	protein_coding	P1
chr1	226658886	226659024	+	1.56723	Ddb1_P2	protein_coding	P2
chr1	226659900	226659906	+	0.576518	Ddb1_P3	protein_coding	P3
chr1	226742280	226742363	+	1.37693	Vps37c_P1	protein_coding	P1
chr1	226742470	226742517	+	1.10826	Vps37c_P2	protein_coding	P2
chr1	226924005	226924049	+	1.15863	chr1:226924005:226924049:+_P1	.	UN
chr1	226947018	226947293	+	154.037	Prpf19_P1	protein_coding	P1
chr1	227584913	227585113	+	5.56928	chr1:227584913:227585113:+_P1	.	UN
chr1	227668596	227668689	+	0.486962	chr1:227668596:227668689:+_P1	.	UN
chr1	227872714	227872795	+	2.12136	AABR07006275.1_P1	protein_coding	P1
chr1	228142734	228142871	+	122.367	Mrpl16_P1	protein_coding	P1
chr1	228146793	228147089	+	5.62525	Mrpl16_P2	protein_coding	P2
chr1	228337671	228337838	+	17.3459	Patl1_P1	protein_coding	P1
chr1	228395299	228395445	+	47.9406	Osbp_P1	protein_coding	P1
chr1	228395629	228395739	+	2.55235	Osbp_P2	protein_coding	P2
chr1	228400491	228400543	+	0.794812	Osbp_P3	protein_coding	P3
chr1	228724552	228724677	+	2.84341	AABR07006310.1_P1	pseudogene	P1
chr1	228724924	228724989	+	2.4628	AABR07006310.1_P2	pseudogene	P2
chr1	229003953	229003989	+	0.951535	Fam111a_P1	protein_coding	P1
chr1	229026061	229026169	+	1.11386	chr1:229026061:229026169:+_P1	.	UN
chr1	229565785	229565863	+	9.14593	chr1:229565785:229565863:+_P1	.	UN
chr1	229642412	229642427	+	0.615699	Lpxn_P1	protein_coding	P1
chr1	233382583	233382800	+	3.09529	Gnaq_P1	protein_coding	P1
chr1	233624299	233624302	+	0.319044	chr1:233624299:233624302:+_P1	.	UN
chr1	234670222	234670295	+	1.09147	chr1:234670222:234670295:+_P1	.	UN
chr1	234749463	234749719	+	45.6681	Ostf1_P1	protein_coding	P1
chr1	234775171	234775203	+	0.514948	Ostf1_P2	protein_coding	P2
chr1	236031459	236031545	+	4.38266	Pcsk5_P1	protein_coding	P1
chr1	236547727	236547820	+	34.1937	AABR07006475.1_P1	lincRNA	P1
chr1	238042408	238042492	+	1.80232	chr1:238042408:238042492:+_P1	.	UN
chr1	238222665	238222708	+	5.56928	Aldh1a1_P1	protein_coding	P1
chr1	238842478	238842557	+	1.67358	Zfand5_P2	protein_coding	P2
chr1	238842857	238842992	+	132.331	Zfand5_P1	protein_coding	P1
chr1	238843295	238843371	+	1.50007	Zfand5_P3	protein_coding	P3
chr1	238846873	238846965	+	0.845187	Zfand5_P4	protein_coding	P4
chr1	239266356	239266640	+	12.5659	Abhd17b_P1	protein_coding	P1
chr1	239397337	239397339	+	1.34334	Cemip2_P2	protein_coding	P2
chr1	239397899	239398261	+	9.11794	Cemip2_P1	protein_coding	P1
chr1	240902622	240902713	+	1.61201	chr1:240902622:240902713:+_P1	.	UN
chr1	240908120	240908935	+	86.3322	Klf9_P1	protein_coding	P1
chr1	240909304	240909423	+	1.28177	Klf9_P2	protein_coding	P2
chr1	240909798	240909830	+	0.856381	Klf9_P5	protein_coding	P5
chr1	240921860	240921865	+	0.979521	Klf9_P4	protein_coding	P4
chr1	240932224	240932311	+	1.00751	Klf9_P3	protein_coding	P3
chr1	241501571	241501689	+	13.8588	Ptar1_P1	protein_coding	P1
chr1	241594590	241594695	+	3.17365	Apba1_P1	protein_coding	P1
chr1	242572394	242572683	+	17.7377	Tmem252_P1	protein_coding	P1
chr1	242959432	242959501	+	2.55235	Dock8_P2	protein_coding	P2
chr1	243108214	243108284	+	3.90689	Dock8_P1	protein_coding	P1
chr1	243200802	243200871	+	7.41638	chr1:243200802:243200871:+_P1	.	UN
chr1	243201041	243201108	+	2.84901	chr1:243201041:243201108:+_P1	.	UN
chr1	243347026	243347149	+	4.81365	Kank1_P2	protein_coding	P2
chr1	243348673	243348757	+	1.57283	Kank1_P4	protein_coding	P4
chr1	243359995	243360065	+	2.32286	Kank1_P3	protein_coding	P3
chr1	243371037	243371444	+	23.6876	Kank1_P1	protein_coding	P1
chr1	243391839	243391893	+	1.32095	Kank1_P5	protein_coding	P5
chr1	244615781	244615926	+	27.0964	Smarca2_P1	protein_coding	P1
chr1	244616544	244616658	+	1.8471	Smarca2_P4	protein_coding	P4
chr1	244617786	244618182	+	10.3885	Smarca2_P2	protein_coding	P2
chr1	244754157	244754237	+	3.8957	Smarca2_P3	protein_coding	P3
chr1	244767770	244767834	+	0.929146	Smarca2_P5	protein_coding	P5
chr1	245237100	245237950	+	71.4211	Vldlr_P1	protein_coding	P1
chr1	245517249	245517341	+	0.610102	chr1:245517249:245517341:+_P1	.	UN
chr1	246954947	246955000	+	1.04109	Slc1a1_P1	protein_coding	P1
chr1	247084155	247084300	+	3.25761	Plpp6_P1	protein_coding	P1
chr1	247110101	247110394	+	38.3804	Cdc37l1_P1	protein_coding	P1
chr1	247227979	247228115	+	13.5734	Rcl1_P1	protein_coding	P1
chr1	247398336	247398505	+	7.18129	Jak2_P1	protein_coding	P1
chr1	247519909	247519961	+	7.64586	Cd274_P1	protein_coding	P1
chr1	247580852	247580997	+	6.46484	Pdcd1lg2_P1	protein_coding	P1
chr1	247688541	247688723	+	13.0248	Ric1_P1	protein_coding	P1
chr1	247783662	247783668	+	0.363822	chr1:247783662:247783668:+_P1	.	UN
chr1	248112632	248112664	+	3.78375	chr1:248112632:248112664:+_P1	.	UN
chr1	248228476	248228785	+	17.4019	Uhrf2_P1	protein_coding	P1
chr1	249574924	249575102	+	41.9627	Cstf2t_P1	protein_coding	P1
chr1	250300547	250300619	+	0.856381	chr1:250300547:250300619:+_P1	.	UN
chr1	250951022	250951098	+	3.95167	chr1:250951022:250951098:+_P1	.	UN
chr1	251045376	251045585	+	14.5025	Minpp1_P1	protein_coding	P1
chr1	251145243	251145346	+	4.16996	Papss2_P1	protein_coding	P1
chr1	251420931	251421074	+	33.9082	Pten_P1	protein_coding	P1
chr1	251440309	251440335	+	0.649283	Pten_P2	protein_coding	P2
chr1	252490897	252491484	+	8.50224	chr1:252490897:252491484:+_P1	.	UN
chr1	252589775	252589844	+	4.20355	Fas_P1	protein_coding	P1
chr1	252894604	252894784	+	14.6201	Ifit2_P1	protein_coding	P1
chr1	252897941	252897958	+	1.38252	Ifit2_P2	protein_coding	P2
chr1	252906183	252906358	+	6.87344	Ifit3_P1	protein_coding	P1
chr1	252944103	252944108	+	2.50198	Ifit1_P1	protein_coding	P1
chr1	253220050	253220138	+	1.65679	chr1:253220050:253220138:+_P1	.	UN
chr1	254697217	254697298	+	32.4529	Rpp30_P1	protein_coding	P1
chr1	254733946	254733977	+	3.49269	chr1:254733946:254733977:+_P1	.	UN
chr1	254974598	254974920	+	15.3421	Pcgf5_P1	protein_coding	P1
chr1	255039905	255040159	+	10.3773	Pcgf5_P2	protein_coding	P2
chr1	255564191	255564308	+	13.467	Btaf1_P1	protein_coding	P1
chr1	255842564	255842841	+	44.8509	March5_P1	protein_coding	P1
chr1	255848422	255848527	+	1.97024	March5_P2	protein_coding	P2
chr1	256035813	256035898	+	2.93856	Kif11_P1	protein_coding	P1
chr1	256101890	256101977	+	9.44259	Hhex_P1	protein_coding	P1
chr1	256226131	256226242	+	16.5679	Exoc6_P1	protein_coding	P1
chr1	256705883	256706164	+	21.8797	chr1:256705883:256706164:+_P1	.	UN
chr1	256745270	256745369	+	1.41611	Cep55_P1	protein_coding	P1
chr1	257157115	257157379	+	35.8841	Plce1_P1	protein_coding	P1
chr1	257258408	257258437	+	0.442184	Plce1_P3	protein_coding	P3
chr1	257297064	257297169	+	1.37133	Plce1_P2	protein_coding	P2
chr1	257517117	257517207	+	3.83413	LOC685933_P1	protein_coding	P1
chr1	259463479	259463605	+	2.93297	chr1:259463479:259463605:+_P1	.	UN
chr1	259480755	259480819	+	1.44969	chr1:259480755:259480819:+_P1	.	UN
chr1	260153557	260153646	+	4.28191	Zfp518a_P1	protein_coding	P1
chr1	260153845	260154138	+	2.39003	Zfp518a_P2	protein_coding	P2
chr1	260732454	260732547	+	13.0304	AABR07006860.1_P1	protein_coding	P1
chr1	260732800	260732859	+	1.94785	AABR07006860.1_P2	protein_coding	P2
chr1	260732969	260733046	+	0.945938	AABR07006860.1_P3	protein_coding	P3
chr1	261158162	261158491	+	185.527	Pgam1_P1	protein_coding	P1
chr1	261162572	261162676	+	1.80792	Pgam1_P4	protein_coding	P4
chr1	261163805	261163966	+	6.07863	Pgam1_P2	protein_coding	P2
chr1	261164754	261164784	+	1.46648	Pgam1_P5	protein_coding	P5
chr1	261164894	261164970	+	3.00013	Pgam1_P3	protein_coding	P3
chr1	261179954	261180065	+	14.4465	Zdhhc16_P1	protein_coding	P1
chr1	261229412	261229726	+	14.9727	Ubtd1_P1	protein_coding	P1
chr1	261281846	261281853	+	0.30785	Ankrd2_P1	protein_coding	P1
chr1	261291673	261291801	+	2.33966	Hoga1_P1	protein_coding	P1
chr1	261337511	261337681	+	40.944	Pi4k2a_P1	protein_coding	P1
chr1	261337824	261337900	+	0.861979	Pi4k2a_P2	protein_coding	P2
chr1	261389178	261389506	+	24.0458	Marveld1_P1	protein_coding	P1
chr1	261415147	261415297	+	9.11794	Zfyve27_P1	protein_coding	P1
chr1	261753302	261753375	+	5.49092	R3hcc1l_P1	protein_coding	P1
chr1	262015282	262015371	+	1.41051	chr1:262015282:262015371:+_P1	.	UN
chr1	263270003	263270323	+	12.3588	chr1:263270003:263270323:+_P1	.	UN
chr1	263448607	263448706	+	3.59344	Entpd7_P1	protein_coding	P1
chr1	263511537	263511660	+	11.133	Cutc_P1	protein_coding	P1
chr1	264059332	264059445	+	31.0312	Scd2_P1	protein_coding	P1
chr1	264059563	264059565	+	0.671672	Scd2_P2	protein_coding	P2
chr1	264309176	264309386	+	99.4186	Hif1an_P1	protein_coding	P1
chr1	264309684	264309688	+	0.576518	Hif1an_P2	protein_coding	P2
chr1	264323475	264323478	+	0.391809	chr1:264323475:264323478:+_P1	.	UN
chr1	264488119	264488184	+	1.30976	AC128836.1_P1	lincRNA	P1
chr1	264670894	264670974	+	18.3031	Slf2_P1	protein_coding	P1
chr1	264755627	264755703	+	1.8359	Twnk_P2	protein_coding	P2
chr1	264756397	264756718	+	26.0273	Twnk_P1	protein_coding	P1
chr1	264756838	264756849	+	1.32655	Twnk_P3	protein_coding	P3
chr1	264765241	264765328	+	5.28382	chr1:264765241:264765328:+_P1	.	UN
chr1	264767534	264767605	+	1.88068	Lzts2_P2	protein_coding	P2
chr1	264767973	264768135	+	38.3469	Lzts2_P1	protein_coding	P1
chr1	264796788	264797084	+	18.7956	Sfxn3_P1	protein_coding	P1
chr1	264799856	264799859	+	0.615699	Sfxn3_P2	protein_coding	P2
chr1	264827676	264827733	+	8.77651	Kazald1_P1	protein_coding	P1
chr1	264830030	264830034	+	0.34703	Kazald1_P2	protein_coding	P2
chr1	265100065	265100259	+	32.0108	chr1:265100065:265100259:+_P1	.	UN
chr1	265100408	265100540	+	0.582115	chr1:265100408:265100540:+_P1	.	UN
chr1	265298868	265298943	+	18.4542	Dpcd_P1	protein_coding	P1
chr1	265761676	265761878	+	5.1103	Hps6_P1	protein_coding	P1
chr1	265798514	265798583	+	1.72396	chr1:265798514:265798583:+_P1	.	UN
chr1	265809881	265809965	+	14.4409	Pprc1_P1	protein_coding	P1
chr1	265829063	265829200	+	23.7716	Nolc1_P1	protein_coding	P1
chr1	265904599	265904694	+	33.3485	Gbf1_P1	protein_coding	P1
chr1	266051948	266052052	+	8.05446	Nfkb2_P1	protein_coding	P1
chr1	266052932	266053083	+	7.81938	Nfkb2_P2	protein_coding	P2
chr1	266075782	266075796	+	0.833992	Fbxl15_P1	protein_coding	P1
chr1	266076051	266076075	+	0.710853	Fbxl15_P2	protein_coding	P2
chr1	266105081	266105163	+	15.6332	Mfsd13a_P1	protein_coding	P1
chr1	266143758	266143913	+	17.2284	Sufu_P1	protein_coding	P1
chr1	266236158	266236225	+	0.789214	Sufu_P2	protein_coding	P2
chr1	266254525	266254909	+	6.47044	Trim8_P2	protein_coding	P2
chr1	266255043	266255335	+	3.08409	Trim8_P3	protein_coding	P3
chr1	266255762	266256237	+	31.6525	Trim8_P1	protein_coding	P1
chr1	266256656	266256737	+	1.4385	Trim8_P4	protein_coding	P4
chr1	266256920	266257017	+	0.828395	Trim8_P5	protein_coding	P5
chr1	266333420	266333485	+	2.03181	Sfxn2_P1	protein_coding	P1
chr1	266358674	266358798	+	24.169	Wbp1l_P1	protein_coding	P1
chr1	266379931	266380103	+	23.307	Wbp1l_P2	protein_coding	P2
chr1	266381015	266381124	+	2.61392	Wbp1l_P3	protein_coding	P3
chr1	266451008	266451154	+	32.0667	Borcs7_P1	protein_coding	P1
chr1	266482789	266483045	+	38.5316	As3mt_P1	protein_coding	P1
chr1	266483404	266483520	+	1.50007	As3mt_P2	protein_coding	P2
chr1	266530396	266530463	+	2.40123	Cnnm2_P1	protein_coding	P1
chr1	266844462	266844501	+	2.91058	Taf5_P1	protein_coding	P1
chr1	266866896	266866982	+	7.9761	Pdcd11_P1	protein_coding	P1
chr1	267359344	267359566	+	38.1286	Slk_P1	protein_coding	P1
chr1	267359857	267359968	+	0.766825	Slk_P2	protein_coding	P2
chr1	267505302	267505410	+	67.0272	Sfr1_P1	protein_coding	P1
chr1	267607397	267607748	+	142.702	Gsto1_P1	protein_coding	P1
chr1	267610454	267610509	+	0.705255	Gsto1_P3	protein_coding	P3
chr1	267612480	267612546	+	1.0131	Gsto1_P2	protein_coding	P2
chr1	267616259	267616296	+	0.548532	Gsto1_P4	protein_coding	P4
chr1	267618487	267618579	+	3.36396	Gsto2_P1	protein_coding	P1
chr1	273854164	273854404	+	20.4188	Add3_P2	protein_coding	P2
chr1	273855218	273855316	+	1.12505	Add3_P4	protein_coding	P4
chr1	273856414	273856558	+	22.417	Add3_P1	protein_coding	P1
chr1	273907618	273907715	+	1.52805	Add3_P3	protein_coding	P3
chr1	274030855	274031028	+	21.5942	Mxi1_P2	protein_coding	P2
chr1	274049455	274049594	+	22.5794	Mxi1_P1	protein_coding	P1
chr1	274245174	274245188	+	9.2019	Dusp5_P1	protein_coding	P1
chr1	274310070	274310170	+	9.96313	Smc3_P1	protein_coding	P1
chr1	274373958	274374134	+	3.11208	chr1:274373958:274374134:+_P1	.	UN
chr1	274391481	274391601	+	3.14566	Rbm20_P3	protein_coding	P3
chr1	274391829	274392195	+	68.421	Rbm20_P1	protein_coding	P1
chr1	274518180	274518514	+	26.2624	Rbm20_P2	protein_coding	P2
chr1	274565595	274565625	+	0.464573	Rbm20_P5	protein_coding	P5
chr1	274589158	274589227	+	1.27058	Rbm20_P4	protein_coding	P4
chr1	274625101	274625303	+	42.2426	Pdcd4_P1	protein_coding	P1
chr1	274632764	274632781	+	0.492559	Pdcd4_P3	protein_coding	P3
chr1	274647862	274647909	+	1.13065	Pdcd4_P2	protein_coding	P2
chr1	274662830	274662921	+	6.05624	chr1:274662830:274662921:+_P1	.	UN
chr1	274663610	274663719	+	31.2943	chr1:274663610:274663719:+_P1	.	UN
chr1	274700620	274700622	+	1.26498	Shoc2_P1	protein_coding	P1
chr1	276011435	276011512	+	1.16983	chr1:276011435:276011512:+_P1	.	UN
chr1	276242276	276242364	+	5.88832	Acsl5_P1	protein_coding	P1
chr1	276242547	276242584	+	5.03194	Acsl5_P2	protein_coding	P2
chr1	276309916	276310034	+	27.7288	Vti1a_P1	protein_coding	P1
chr1	277190779	277191134	+	8.67016	Casp7_P1	protein_coding	P1
chr1	277224560	277224746	+	7.64586	Casp7_P2	protein_coding	P2
chr1	277355609	277355656	+	1.51126	Nhlrc2_P2	protein_coding	P2
chr1	277355803	277356041	+	21.4095	Nhlrc2_P1	protein_coding	P1
chr1	277541750	277541810	+	1.8415	AABR07007026.1_P1	lincRNA	P1
chr1	277669215	277669378	+	1.2314	Tdrd1_P1	protein_coding	P1
chr1	277689581	277689610	+	0.397406	Vwa2_P1	protein_coding	P1
chr1	278096953	278097020	+	0.632491	chr1:278096953:278097020:+_P1	.	UN
chr1	278197961	278198053	+	4.77447	Fam160b1_P1	protein_coding	P1
chr1	278311356	278311392	+	6.11221	Trub1_P1	protein_coding	P1
chr1	281863927	281863947	+	1.15304	LOC100359574_P1	protein_coding	P1
chr1	282170067	282170108	+	0.912354	chr1:282170067:282170108:+_P1	.	UN
chr1	282188064	282188142	+	13.495	Fam45a_P1	protein_coding	P1
chr1	282265221	282265471	+	8.19999	Grk5_P1	protein_coding	P1
chr10	730215	730294	+	46.7763	Fopnl_P1	protein_coding	P1
chr10	764426	764486	+	24.6559	Myh11_P1	protein_coding	P1
chr10	1151387	1151451	+	27.88	AABR07028970.1_P1	miRNA	P1
chr10	1464581	1464853	+	45.517	Bfar_P1	protein_coding	P1
chr10	1487734	1487776	+	0.643685	Bfar_P2	protein_coding	P2
chr10	3170718	3170776	+	13.5678	Rrn3_P1	protein_coding	P1
chr10	3218374	3218543	+	39.9869	Ntan1_P1	protein_coding	P1
chr10	3338781	3338821	+	1.57843	Mpv17l_P1	protein_coding	P1
chr10	3655072	3655110	+	0.90116	Cpped1_P1	protein_coding	P1
chr10	4249861	4249903	+	1.04669	chr10:4249861:4249903:+_P1	.	UN
chr10	4536148	4536275	+	12.5211	Zc3h7a_P1	protein_coding	P1
chr10	4578419	4578600	+	23.6652	Txndc11_P1	protein_coding	P1
chr10	4719648	4719768	+	25.4396	Litaf_P1	protein_coding	P1
chr10	4753545	4753567	+	0.660477	Litaf_P2	protein_coding	P2
chr10	5199167	5199319	+	32.6097	Dexi_P1	protein_coding	P1
chr10	5433169	5433320	+	20.7043	Emp2_P1	protein_coding	P1
chr10	6876997	6877020	+	1.05788	chr10:6876997:6877020:+_P1	.	UN
chr10	6889127	6889193	+	0.945938	AC129395.2_P2	lincRNA	P2
chr10	6889914	6890147	+	3.52628	AC129395.2_P1	lincRNA	P1
chr10	7041463	7041539	+	145.389	Carhsp1_P1	protein_coding	P1
chr10	7043672	7043774	+	2.6531	Carhsp1_P5	protein_coding	P5
chr10	7049963	7050013	+	4.19235	Carhsp1_P3	protein_coding	P3
chr10	7052402	7052472	+	9.24108	Carhsp1_P2	protein_coding	P2
chr10	7052590	7052635	+	3.40314	Carhsp1_P4	protein_coding	P4
chr10	7077429	7077651	+	24.0403	Tmem186_P1	protein_coding	P1
chr10	10457266	10457363	+	2.0542	Rbm25l1_P1	protein_coding	P1
chr10	10458309	10458379	+	0.626894	Rbm25l1_P2	protein_coding	P2
chr10	10530355	10530395	+	2.37884	Eef2kmt_P1	protein_coding	P1
chr10	10573191	10573220	+	2.13816	Nagpa_P1	protein_coding	P1
chr10	10644492	10644559	+	2.40123	Ppl_P1	protein_coding	P1
chr10	10725744	10725850	+	46.4293	Glyr1_P1	protein_coding	P1
chr10	10726847	10726878	+	1.24819	Glyr1_P2	protein_coding	P2
chr10	10761567	10761677	+	26.3463	Rogdi_P1	protein_coding	P1
chr10	10761805	10761862	+	1.16983	Rogdi_P2	protein_coding	P2
chr10	10808768	10808842	+	5.99467	Anks3_P1	protein_coding	P1
chr10	10875977	10875978	+	1.07467	AABR07072078.1_P1	protein_coding	P1
chr10	10967272	10967422	+	8.70375	Cdip1_P2	protein_coding	P2
chr10	10967541	10967764	+	82.319	Cdip1_P1	protein_coding	P1
chr10	10988731	10988750	+	0.498157	Cdip1_P3	protein_coding	P3
chr10	11046036	11046107	+	1.06908	Nmral1_P1	protein_coding	P1
chr10	11090181	11090255	+	1.12505	Coro7_P1	protein_coding	P1
chr10	11116180	11116229	+	1.10826	Coro7_P2	protein_coding	P2
chr10	11146285	11146428	+	170.252	Pam16_P1	protein_coding	P1
chr10	11152438	11152517	+	1.2258	Pam16_P2	protein_coding	P2
chr10	11153173	11153205	+	0.738839	Pam16_P3	protein_coding	P3
chr10	11205020	11205084	+	0.878771	chr10:11205020:11205084:+_P1	.	UN
chr10	11206012	11206237	+	5.20546	Tfap4_P1	protein_coding	P1
chr10	11240090	11240216	+	206.802	Srl_P1	protein_coding	P1
chr10	11266172	11266383	+	3.29119	Srl_P3	protein_coding	P3
chr10	11269900	11269997	+	4.52819	Srl_P2	protein_coding	P2
chr10	11271976	11272029	+	1.90867	Srl_P5	protein_coding	P5
chr10	11276640	11276723	+	2.21652	Srl_P4	protein_coding	P4
chr10	11289096	11289156	+	0.973924	chr10:11289096:11289156:+_P1	.	UN
chr10	11373213	11373270	+	0.828395	LOC108348151_P1	protein_coding	P1
chr10	11590350	11590458	+	6.49283	chr10:11590350:11590458:+_P1	.	UN
chr10	11718385	11718399	+	0.861979	Crebbp_P1	protein_coding	P1
chr10	11723951	11724062	+	87.4069	Trap1_P1	protein_coding	P1
chr10	11785598	11785713	+	4.27071	Slx4_P1	protein_coding	P1
chr10	11810678	11810735	+	0.475767	Nlrc3_P1	protein_coding	P1
chr10	11877885	11877987	+	3.0785	RGD1561796_P1	protein_coding	P1
chr10	11901882	11901953	+	2.76505	chr10:11901882:11901953:+_P1	.	UN
chr10	12875338	12875419	+	0.873173	chr10:12875338:12875419:+_P1	.	UN
chr10	12994255	12994378	+	51.0191	AABR07029198.1_P2	protein_coding	P2
chr10	12994481	12994787	+	419.75	AABR07029198.1_P1	protein_coding	P1
chr10	12995242	12995475	+	9.55453	AABR07029198.1_P3	protein_coding	P3
chr10	13084367	13084441	+	9.06757	RGD1561157_P1	protein_coding	P1
chr10	13140779	13140828	+	14.9503	chr10:13140779:13140828:+_P1	.	UN
chr10	13141581	13141631	+	54.2487	chr10:13141581:13141631:+_P1	.	UN
chr10	13145068	13145255	+	2.20532	Srrm2_P3	protein_coding	P3
chr10	13146250	13146302	+	4.80245	Srrm2_P1	protein_coding	P1
chr10	13146472	13146565	+	0.481365	Srrm2_P4	protein_coding	P4
chr10	13150798	13150802	+	0.458976	Srrm2_P5	protein_coding	P5
chr10	13160632	13160796	+	4.14757	Srrm2_P2	protein_coding	P2
chr10	13515652	13515714	+	0.934743	chr10:13515652:13515714:+_P1	.	UN
chr10	13592067	13592125	+	2.71467	chr10:13592067:13592125:+_P1	.	UN
chr10	13723290	13723405	+	8.66457	Abca3_P1	protein_coding	P1
chr10	13786412	13786532	+	76.5538	Rnps1_P1	protein_coding	P1
chr10	13791739	13791770	+	0.453378	Rnps1_P3	protein_coding	P3
chr10	13792928	13793008	+	1.33215	Rnps1_P2	protein_coding	P2
chr10	13797380	13797814	+	302.941	Eci1_P1	protein_coding	P1
chr10	13802906	13803024	+	1.4273	Eci1_P4	protein_coding	P4
chr10	13808199	13808472	+	8.00409	Eci1_P3	protein_coding	P3
chr10	13809262	13809588	+	13.8868	Eci1_P2	protein_coding	P2
chr10	13836038	13836306	+	50.4314	Pgp_P1	protein_coding	P1
chr10	13836488	13836594	+	0.761228	Pgp_P2	protein_coding	P2
chr10	13893419	13893429	+	4.07481	Snord60_P1	snoRNA	P1
chr10	13914945	13915095	+	14.5305	Pkd1_P1	protein_coding	P1
chr10	13996614	13996710	+	7.1701	Nthl1_P1	protein_coding	P1
chr10	13999431	13999490	+	0.861979	Nthl1_P2	protein_coding	P2
chr10	14004022	14004044	+	0.77802	chr10:14004022:14004044:+_P1	.	UN
chr10	14035061	14035157	+	31.188	Zfp598_P1	protein_coding	P1
chr10	14088100	14088657	+	760.556	Rps2_P1	protein_coding	P1
chr10	14088832	14088935	+	5.05433	Rps2_P3	protein_coding	P3
chr10	14089190	14089643	+	61.5307	Rps2_P2	protein_coding	P2
chr10	14094657	14094894	+	318.876	Rpl3l_P1	protein_coding	P1
chr10	14095202	14095368	+	7.90334	Rpl3l_P2	protein_coding	P2
chr10	14099763	14099862	+	6.129	Rpl3l_P3	protein_coding	P3
chr10	14102817	14102937	+	4.9144	Rpl3l_P4	protein_coding	P4
chr10	14104613	14104638	+	3.77815	Rpl3l_P5	protein_coding	P5
chr10	14105689	14105808	+	33.7123	Msrb1_P1	protein_coding	P1
chr10	14215755	14215895	+	2.30607	Hagh_P2	protein_coding	P2
chr10	14216129	14216318	+	35.9176	Hagh_P1	protein_coding	P1
chr10	14222416	14222510	+	1.19781	Hagh_P3	protein_coding	P3
chr10	14226124	14226177	+	0.873173	Hagh_P4	protein_coding	P4
chr10	14226822	14226864	+	0.811603	Hagh_P5	protein_coding	P5
chr10	14248217	14248465	+	27.5162	Spsb3_P1	protein_coding	P1
chr10	14256958	14257168	+	133.741	Mrps34_P1	protein_coding	P1
chr10	14257513	14257843	+	8.36791	Mrps34_P2	protein_coding	P2
chr10	14258347	14258429	+	10.6684	Nme3_P1	protein_coding	P1
chr10	14373640	14373700	+	0.878771	Ift140_P2	protein_coding	P2
chr10	14373913	14374027	+	3.36955	Ift140_P1	protein_coding	P1
chr10	14492793	14492903	+	14.0156	Clcn7_P1	protein_coding	P1
chr10	14543163	14543451	+	67.2735	RGD1565784_P1	protein_coding	P1
chr10	14543713	14543716	+	6.68313	RGD1565784_P2	protein_coding	P2
chr10	14547128	14547188	+	5.88272	Unkl_P1	protein_coding	P1
chr10	14598011	14598083	+	15.2805	Tsr3_P1	protein_coding	P1
chr10	14722662	14722667	+	1.96464	Tpsb2_P1	protein_coding	P1
chr10	14945233	14945325	+	20.374	Lmf1_P1	protein_coding	P1
chr10	15099074	15099163	+	5.1215	Rpusd1_P1	protein_coding	P1
chr10	15143679	15143815	+	47.9462	Ciao3_P1	protein_coding	P1
chr10	15146839	15146840	+	0.397406	Ciao3_P2	protein_coding	P2
chr10	15156147	15156186	+	1.38252	Ccdc78_P1	protein_coding	P1
chr10	15157277	15157335	+	0.973924	Ccdc78_P2	protein_coding	P2
chr10	15176457	15176552	+	1.15304	chr10:15176457:15176552:+_P1	.	UN
chr10	15190689	15190793	+	10.1758	Wdr24_P1	protein_coding	P1
chr10	15195915	15196213	+	46.2222	Jmjd8_P1	protein_coding	P1
chr10	15200048	15200257	+	13.2095	chr10:15200048:15200257:+_P1	.	UN
chr10	15241533	15241591	+	9.09555	Mettl26_P1	protein_coding	P1
chr10	15485871	15485940	+	1.44969	Tmem8a_P1	protein_coding	P1
chr10	15495612	15495967	+	131.144	Mrpl28_P1	protein_coding	P1
chr10	15496721	15496733	+	0.800409	Mrpl28_P3	protein_coding	P3
chr10	15497490	15497528	+	0.945938	Mrpl28_P2	protein_coding	P2
chr10	15538867	15538972	+	17.2004	Luc7l_P1	protein_coding	P1
chr10	15589922	15589958	+	0.526143	chr10:15589922:15589958:+_P1	.	UN
chr10	15620810	15620949	+	18.3254	Nprl3_P1	protein_coding	P1
chr10	15672316	15672467	+	15.9074	Rhbdf1_P1	protein_coding	P1
chr10	16259770	16260160	+	32.8783	Bod1_P1	protein_coding	P1
chr10	16542586	16542849	+	5.74279	Stc2_P1	protein_coding	P1
chr10	16626926	16627217	+	2.37324	chr10:16626926:16627217:+_P1	.	UN
chr10	16632228	16632308	+	3.34716	chr10:16632228:16632308:+_P1	.	UN
chr10	16635848	16636271	+	69.8874	Nkx2-5_P1	protein_coding	P1
chr10	16638174	16638234	+	5.54689	Nkx2-5_P2	protein_coding	P2
chr10	16638430	16638442	+	0.386211	Nkx2-5_P3	protein_coding	P3
chr10	16638604	16638605	+	0.291058	Nkx2-5_P4	protein_coding	P4
chr10	16970601	16970818	+	82.7052	Dusp1_P1	protein_coding	P1
chr10	16972756	16972804	+	0.996313	Dusp1_P2	protein_coding	P2
chr10	17209145	17209198	+	12.5155	Sh3pxd2b_P1	protein_coding	P1
chr10	17420931	17421038	+	13.2431	Stk10_P1	protein_coding	P1
chr10	17542485	17542530	+	12.6554	Fbxw11_P1	protein_coding	P1
chr10	18912136	18912196	+	2.043	Kcnmb1_P1	protein_coding	P1
chr10	18996446	18996582	+	7.00778	Lcp2_P1	protein_coding	P1
chr10	19924054	19924111	+	1.81911	chr10:19924054:19924111:+_P1	.	UN
chr10	20591035	20591227	+	21.2528	Pank3_P1	protein_coding	P1
chr10	20591374	20591438	+	4.75767	Pank3_P2	protein_coding	P2
chr10	23660441	23660512	+	4.13078	Ebf1_P2	protein_coding	P2
chr10	23660641	23660694	+	0.537337	Ebf1_P4	protein_coding	P4
chr10	23660992	23661066	+	1.10826	Ebf1_P3	protein_coding	P3
chr10	23661283	23661411	+	16.0362	Ebf1_P1	protein_coding	P1
chr10	25890880	25890992	+	3.99645	Nudcd2_P2	protein_coding	P2
chr10	25891124	25891218	+	19.2602	Nudcd2_P1	protein_coding	P1
chr10	25909153	25909171	+	0.604505	chr10:25909153:25909171:+_P1	.	UN
chr10	27975265	27975304	+	1.46648	Gabrb2_P1	protein_coding	P1
chr10	29029486	29029606	+	36.5501	Slu7_P1	protein_coding	P1
chr10	29034153	29034156	+	0.375017	Slu7_P4	protein_coding	P4
chr10	29034793	29034850	+	0.744436	Slu7_P2	protein_coding	P2
chr10	29035679	29035688	+	0.53174	Slu7_P3	protein_coding	P3
chr10	29067021	29067147	+	10.2374	C1qtnf2_P1	protein_coding	P1
chr10	29083319	29083384	+	0.610102	C1qtnf2_P2	protein_coding	P2
chr10	29122658	29122739	+	1.77993	Ccnjl_P1	protein_coding	P1
chr10	29165551	29165592	+	0.710853	Ccnjl_P2	protein_coding	P2
chr10	29289095	29289207	+	5.75399	Pwwp2a_P1	protein_coding	P1
chr10	29408240	29408356	+	3.31358	chr10:29408240:29408356:+_P1	.	UN
chr10	29450280	29450287	+	0.794812	chr10:29450280:29450287:+_P1	.	UN
chr10	30118950	30119012	+	0.733242	chr10:30118950:30119012:+_P1	.	UN
chr10	30833913	30834008	+	3.51508	Clint1_P1	protein_coding	P1
chr10	30953246	30953287	+	1.65679	Clint1_P2	protein_coding	P2
chr10	31145990	31146291	+	190.324	Adam19_P1	protein_coding	P1
chr10	31150287	31150516	+	3.44232	Adam19_P2	protein_coding	P2
chr10	31153352	31153421	+	2.11017	Adam19_P4	protein_coding	P4
chr10	31154801	31154891	+	3.40314	Adam19_P3	protein_coding	P3
chr10	31193723	31193773	+	1.53925	Adam19_P5	protein_coding	P5
chr10	31532199	31532294	+	7.9873	Med7_P1	protein_coding	P1
chr10	31880874	31880907	+	0.929146	AABR07072096.1_P1	protein_coding	P1
chr10	34149705	34149938	+	365.244	Rack1_P1	protein_coding	P1
chr10	34151010	34151144	+	4.5058	Rack1_P4	protein_coding	P4
chr10	34151629	34151759	+	5.78197	Rack1_P3	protein_coding	P3
chr10	34152690	34152782	+	6.57679	Rack1_P2	protein_coding	P2
chr10	34153089	34153196	+	2.8546	Rack1_P5	protein_coding	P5
chr10	34185532	34185658	+	1.05229	Trim7_P2	protein_coding	P2
chr10	34185809	34185909	+	16.0026	Trim7_P1	protein_coding	P1
chr10	34277936	34278075	+	13.982	Ifi47_P1	protein_coding	P1
chr10	34355699	34355738	+	3.62703	AC103024.1_P1	protein_coding	P1
chr10	34477103	34477355	+	19.0027	chr10:34477103:34477355:+_P1	.	UN
chr10	34518096	34518138	+	0.632491	chr10:34518096:34518138:+_P1	.	UN
chr10	34518325	34518513	+	11.7319	chr10:34518325:34518513:+_P1	.	UN
chr10	34524721	34524910	+	17.9224	Mgat1_P1	protein_coding	P1
chr10	35078666	35078781	+	6.38088	Flt4_P1	protein_coding	P1
chr10	35279207	35279316	+	13.2767	Gfpt2_P1	protein_coding	P1
chr10	35333812	35334066	+	44.3023	Mapk9_P1	protein_coding	P1
chr10	35560637	35560645	+	0.503754	AABR07029581.1_P1	protein_coding	P1
chr10	35637079	35637315	+	59.818	Tbc1d9b_P1	protein_coding	P1
chr10	35641907	35641970	+	0.889965	Tbc1d9b_P2	protein_coding	P2
chr10	35680622	35680685	+	2.09897	Mrnip_P1	protein_coding	P1
chr10	35716356	35716418	+	0.979521	chr10:35716356:35716418:+_P1	.	UN
chr10	35726491	35726595	+	10.5956	Mgat4b_P1	protein_coding	P1
chr10	35870577	35870721	+	41.666	Hnrnph1_P1	protein_coding	P1
chr10	35871267	35871290	+	0.369419	Hnrnph1_P4	protein_coding	P4
chr10	35872441	35872443	+	0.453378	Hnrnph1_P3	protein_coding	P3
chr10	35872596	35872615	+	0.313447	Hnrnph1_P5	protein_coding	P5
chr10	35874529	35874594	+	0.878771	Hnrnph1_P2	protein_coding	P2
chr10	36084323	36084328	+	0.973924	chr10:36084323:36084328:+_P1	.	UN
chr10	36097890	36098120	+	23.822	Adamts2_P1	protein_coding	P1
chr10	36099319	36099324	+	1.16983	Adamts2_P2	protein_coding	P2
chr10	36588324	36588400	+	3.42553	Zfp354a_P1	protein_coding	P1
chr10	36716764	36716860	+	15.3533	Clk4_P1	protein_coding	P1
chr10	37215887	37216042	+	104.406	Sar1b_P1	protein_coding	P1
chr10	37245088	37245165	+	0.59331	Sar1b_P2	protein_coding	P2
chr10	37422535	37422663	+	26.6262	Cdkn2aipnl_P1	protein_coding	P1
chr10	37594513	37594658	+	604.202	Skp1_P1	protein_coding	P1
chr10	37605543	37605572	+	2.59713	Skp1_P5	protein_coding	P5
chr10	37606587	37606724	+	5.59167	Skp1_P3	protein_coding	P3
chr10	37607820	37607958	+	8.70375	Skp1_P2	protein_coding	P2
chr10	37608821	37609137	+	3.86771	Skp1_P4	protein_coding	P4
chr10	37714718	37714818	+	0.71645	chr10:37714718:37714818:+_P1	.	UN
chr10	37724686	37724989	+	755.933	Vdac1_P1	protein_coding	P1
chr10	37738317	37738386	+	9.85119	Vdac1_P3	protein_coding	P3
chr10	37739839	37740131	+	7.28764	Vdac1_P5	protein_coding	P5
chr10	37747096	37747302	+	9.80081	Vdac1_P4	protein_coding	P4
chr10	37751853	37752575	+	110.966	Vdac1_P2	protein_coding	P2
chr10	37757082	37757315	+	53.8681	RGD1310352_P1	protein_coding	P1
chr10	37764317	37764371	+	0.481365	RGD1310352_P2	protein_coding	P2
chr10	38663976	38664017	+	13.2655	AABR07072108.1_P1	protein_coding	P1
chr10	38692106	38692513	+	41.0447	Aff4_P1	protein_coding	P1
chr10	38877260	38877507	+	16.8086	Sept8_P1	protein_coding	P1
chr10	38891227	38891262	+	0.319044	Sept8_P2	protein_coding	P2
chr10	38918718	38918812	+	5.56928	Kif3a_P1	protein_coding	P1
chr10	39109434	39109511	+	20.4692	Irf1_P1	protein_coding	P1
chr10	39109877	39109933	+	1.17543	Irf1_P2	protein_coding	P2
chr10	39373639	39373739	+	3.66621	chr10:39373639:39373739:+_P1	.	UN
chr10	39435254	39435356	+	17.9616	P4ha2_P1	protein_coding	P1
chr10	39435862	39435891	+	0.666074	P4ha2_P2	protein_coding	P2
chr10	39655038	39655098	+	0.845187	Acsl6_P3	protein_coding	P3
chr10	39655263	39655494	+	4.84723	Acsl6_P2	protein_coding	P2
chr10	39706882	39707039	+	11.4912	Acsl6_P1	protein_coding	P1
chr10	39786604	39786858	+	27.0236	chr10:39786604:39786858:+_P1	.	UN
chr10	39875315	39875473	+	8.58061	Rapgef6_P1	protein_coding	P1
chr10	40208127	40208399	+	195.664	Hint1_P1	protein_coding	P1
chr10	40211680	40211725	+	0.335836	Hint1_P2	protein_coding	P2
chr10	40247389	40247576	+	333.043	Gpx3_P1	protein_coding	P1
chr10	40254079	40254137	+	6.11781	Gpx3_P3	protein_coding	P3
chr10	40254477	40254961	+	11.4912	Gpx3_P2	protein_coding	P2
chr10	40322655	40322670	+	2.11017	AC093965.1_P1	pseudogene	P1
chr10	40438276	40438518	+	30.1637	Gm2a_P1	protein_coding	P1
chr10	40543256	40543347	+	10.0695	Slc36a1_P1	protein_coding	P1
chr10	40749783	40749903	+	5.5189	chr10:40749783:40749903:+_P1	.	UN
chr10	40751130	40751178	+	56.4596	chr10:40751130:40751178:+_P1	.	UN
chr10	40812765	40812882	+	62.1408	G3bp1_P1	protein_coding	P1
chr10	40829023	40829026	+	1.05788	G3bp1_P2	protein_coding	P2
chr10	42933054	42933111	+	9.39221	Mfap3_P1	protein_coding	P1
chr10	43067177	43067323	+	14.1947	Galnt10_P1	protein_coding	P1
chr10	43223796	43223940	+	39.5167	Sap30l_P1	protein_coding	P1
chr10	43224181	43224417	+	1.16983	Sap30l_P2	protein_coding	P2
chr10	43435519	43435800	+	29.7607	chr10:43435519:43435800:+_P1	.	UN
chr10	43446047	43446114	+	0.789214	Larp1_P3	protein_coding	P3
chr10	43477837	43477898	+	3.66061	Larp1_P1	protein_coding	P1
chr10	43478120	43478175	+	0.65488	Larp1_P4	protein_coding	P4
chr10	43479113	43479150	+	0.889965	Larp1_P2	protein_coding	P2
chr10	43498435	43498522	+	0.65488	chr10:43498435:43498522:+_P1	.	UN
chr10	43538097	43538388	+	38.9961	Cnot8_P1	protein_coding	P1
chr10	43542728	43542872	+	1.29857	Cnot8_P2	protein_coding	P2
chr10	43601751	43601860	+	83.7239	Mrpl22_P1	protein_coding	P1
chr10	43608550	43608605	+	0.514948	Mrpl22_P2	protein_coding	P2
chr10	43616616	43616758	+	3.96846	Igtp_P3	protein_coding	P3
chr10	43631007	43631176	+	11.0882	Igtp_P2	protein_coding	P2
chr10	43645470	43645630	+	18.1127	Igtp_P1	protein_coding	P1
chr10	43744641	43744746	+	2.82102	Zfp692_P1	protein_coding	P1
chr10	43768619	43768720	+	14.9727	Sh3bp5l_P1	protein_coding	P1
chr10	45169363	45169501	+	3.01693	RGD1561277_P1	protein_coding	P1
chr10	45193979	45194063	+	3.19044	LOC102555635_P1	protein_coding	P1
chr10	45289733	45289747	+	6.9518	Hist3h2ba_P1	protein_coding	P1
chr10	45297504	45297580	+	54.0976	Trim17_P1	protein_coding	P1
chr10	45297693	45297767	+	1.2258	Trim17_P2	protein_coding	P2
chr10	45322176	45322283	+	4.25392	Trim11_P1	protein_coding	P1
chr10	45343039	45343183	+	9.33064	chr10:45343039:45343183:+_P1	.	UN
chr10	45346729	45347038	+	159.147	chr10:45346729:45347038:+_P1	.	UN
chr10	45354094	45354100	+	0.358225	chr10:45354094:45354100:+_P1	.	UN
chr10	45552773	45552880	+	62.2136	Mrpl55_P1	protein_coding	P1
chr10	45554547	45554616	+	1.237	Mrpl55_P2	protein_coding	P2
chr10	45559513	45559629	+	20.0886	RGD1304587_P1	protein_coding	P1
chr10	45658992	45659100	+	3.11768	Wnt9a_P1	protein_coding	P1
chr10	45798764	45798860	+	2.59713	Jmjd4_P1	protein_coding	P1
chr10	46018359	46018798	+	145.221	Mprip_P1	protein_coding	P1
chr10	46085337	46085356	+	0.503754	Mprip_P2	protein_coding	P2
chr10	46216827	46216938	+	9.57692	Nt5m_P1	protein_coding	P1
chr10	46217067	46217162	+	1.95904	Nt5m_P2	protein_coding	P2
chr10	46314638	46314646	+	22.9824	Med9_P1	protein_coding	P1
chr10	46476534	46476735	+	8.06006	chr10:46476534:46476735:+_P1	.	UN
chr10	46720231	46720395	+	7.28764	chr10:46720231:46720395:+_P1	.	UN
chr10	46784068	46784276	+	58.7713	Gid4_P1	protein_coding	P1
chr10	46784392	46784508	+	9.75603	Gid4_P2	protein_coding	P2
chr10	46804831	46804833	+	0.425392	Gid4_P3	protein_coding	P3
chr10	46818383	46818501	+	25.2605	Drg2_P1	protein_coding	P1
chr10	46905522	46905668	+	23.5981	Alkbh5_P2	protein_coding	P2
chr10	46905853	46906015	+	26.0665	Alkbh5_P1	protein_coding	P1
chr10	46928549	46928594	+	0.929146	Alkbh5_P3	protein_coding	P3
chr10	46940797	46941052	+	9.25228	Llgl1_P1	protein_coding	P1
chr10	46969466	46969542	+	2.40123	chr10:46969466:46969542:+_P1	.	UN
chr10	46970538	46970727	+	55.5976	AC129460.1_P1	miRNA	P1
chr10	46973967	46973984	+	0.391809	Mief2_P1	protein_coding	P1
chr10	47018950	47019014	+	12.3867	Smcr8_P1	protein_coding	P1
chr10	47065795	47065904	+	7.85296	Dhrs7b_P1	protein_coding	P1
chr10	47281759	47281981	+	8.14962	Kcnj12_P1	protein_coding	P1
chr10	47282167	47282257	+	4.48341	Kcnj12_P2	protein_coding	P2
chr10	47490287	47490294	+	0.582115	Aldh3a1_P1	protein_coding	P1
chr10	47930598	47930700	+	6.70552	Grap_P1	protein_coding	P1
chr10	48240298	48240342	+	1.94785	Specc1_P1	protein_coding	P1
chr10	48292776	48292841	+	0.833992	Specc1_P2	protein_coding	P2
chr10	48599277	48599398	+	25.837	Ttc19_P1	protein_coding	P1
chr10	48772968	48773089	+	1.0187	Pigl_P2	protein_coding	P2
chr10	48773984	48774073	+	1.91986	Pigl_P1	protein_coding	P1
chr10	48880169	48880299	+	386.67	Ubb_P1	pseudogene	P1
chr10	48880828	48880836	+	0.65488	Ubb_P4	pseudogene	P4
chr10	48880943	48881028	+	4.9144	Ubb_P3	pseudogene	P3
chr10	48881278	48881518	+	58.525	Ubb_P2	pseudogene	P2
chr10	48903517	48903619	+	1.11386	Trpv2_P1	protein_coding	P1
chr10	48927517	48927529	+	11.3513	Snord49b_P1	snoRNA	P1
chr10	48986160	48986162	+	0.934743	chr10:48986160:48986162:+_P1	.	UN
chr10	48987823	48987830	+	2.61392	AABR07029742.1_P1	pseudogene	P1
chr10	49231692	49232013	+	9.0116	Trim16_P1	protein_coding	P1
chr10	49264041	49264102	+	0.906757	Fbxw10_P1	protein_coding	P1
chr10	49299035	49299162	+	15.2805	Tvp23b_P1	protein_coding	P1
chr10	49498825	49498869	+	0.458976	Tekt3_P1	protein_coding	P1
chr10	49538540	49538663	+	12.1349	Pmp22_P2	protein_coding	P2
chr10	49541002	49541197	+	38.2181	Pmp22_P1	protein_coding	P1
chr10	49567370	49567562	+	2.17174	Pmp22_P3	protein_coding	P3
chr10	51478321	51478411	+	23.4134	Elac2_P1	protein_coding	P1
chr10	51668676	51668700	+	1.09706	chr10:51668676:51668700:+_P1	.	UN
chr10	52327684	52327767	+	5.61406	chr10:52327684:52327767:+_P1	.	UN
chr10	53466801	53466870	+	1.73515	Pirt_P1	protein_coding	P1
chr10	53570939	53570977	+	1.44409	Tmem220_P1	protein_coding	P1
chr10	53595825	53595892	+	19.6464	Sco1_P1	protein_coding	P1
chr10	54010710	54010785	+	0.677269	chr10:54010710:54010785:+_P1	.	UN
chr10	54010959	54011030	+	0.979521	chr10:54010959:54011030:+_P1	.	UN
chr10	54126575	54126625	+	1.28177	Gas7_P2	protein_coding	P2
chr10	54141455	54141675	+	15.2078	Gas7_P1	protein_coding	P1
chr10	54352227	54352408	+	52.9725	Dhrs7c_P1	protein_coding	P1
chr10	54352672	54352675	+	0.4086	Dhrs7c_P5	protein_coding	P5
chr10	54363133	54363147	+	0.817201	Dhrs7c_P3	protein_coding	P3
chr10	54364528	54364662	+	2.69228	Dhrs7c_P2	protein_coding	P2
chr10	54366341	54366398	+	0.559726	Dhrs7c_P4	protein_coding	P4
chr10	54468364	54468490	+	2.52996	chr10:54468364:54468490:+_P1	.	UN
chr10	54512936	54513026	+	25.1093	Stx8_P1	protein_coding	P1
chr10	55013683	55013744	+	1.8415	Pik3r5_P1	protein_coding	P1
chr10	55085252	55085338	+	5.42935	Pik3r6_P1	protein_coding	P1
chr10	55274866	55274944	+	1.06908	Myh10_P2	protein_coding	P2
chr10	55275290	55275551	+	16.1369	Myh10_P1	protein_coding	P1
chr10	55492388	55492479	+	642.986	Rpl26_P1	protein_coding	P1
chr10	55493115	55493236	+	7.11972	Rpl26_P2	protein_coding	P2
chr10	55544893	55544963	+	3.62143	chr10:55544893:55544963:+_P1	.	UN
chr10	55554902	55554982	+	8.13842	Slc25a35_P1	protein_coding	P1
chr10	55593439	55593508	+	2.43481	AC129753.3_P1	snoRNA	P1
chr10	55596360	55596434	+	10.5229	Ctc1_P1	protein_coding	P1
chr10	55626717	55626810	+	2.07099	Aurkb_P1	protein_coding	P1
chr10	55642028	55642188	+	8.81569	Borcs6_P1	protein_coding	P1
chr10	55653947	55654017	+	1.47768	Tmem107_P1	protein_coding	P1
chr10	55675480	55675616	+	65.3705	Vamp2_P1	protein_coding	P1
chr10	55676125	55676177	+	1.8471	Vamp2_P3	protein_coding	P3
chr10	55676751	55676851	+	7.7746	Vamp2_P2	protein_coding	P2
chr10	55677700	55677886	+	1.2258	Vamp2_P4	protein_coding	P4
chr10	55678244	55678262	+	0.514948	Vamp2_P5	protein_coding	P5
chr10	55681809	55681891	+	27.9695	chr10:55681809:55681891:+_P1	.	UN
chr10	55685453	55685542	+	8.30634	chr10:55685453:55685542:+_P1	.	UN
chr10	55686703	55686810	+	1.46648	Per1_P1	protein_coding	P1
chr10	55687248	55687253	+	1.09706	Per1_P2	protein_coding	P2
chr10	55729100	55729213	+	8.92764	Aloxe3_P1	protein_coding	P1
chr10	55729791	55729793	+	0.430989	Aloxe3_P2	protein_coding	P2
chr10	55924883	55925086	+	26.1224	Trappc1_P1	protein_coding	P1
chr10	55925869	55925888	+	0.542935	Trappc1_P2	protein_coding	P2
chr10	55940749	55940820	+	0.968327	RGD1563441_P1	protein_coding	P1
chr10	55997462	55997538	+	2.94416	Naa38_P3	protein_coding	P3
chr10	55997747	55997958	+	118.477	Naa38_P1	protein_coding	P1
chr10	55998117	55998303	+	53.2972	Naa38_P2	protein_coding	P2
chr10	56186975	56187098	+	16.8086	Tp53_P1	protein_coding	P1
chr10	56227670	56227757	+	2.46839	Sat2_P2	protein_coding	P2
chr10	56227877	56228057	+	45.4106	Sat2_P1	protein_coding	P1
chr10	56228177	56228189	+	1.05788	Sat2_P4	protein_coding	P4
chr10	56228817	56228872	+	1.06348	Sat2_P3	protein_coding	P3
chr10	56237413	56237628	+	35.7497	Fxr2_P1	protein_coding	P1
chr10	56237735	56237903	+	1.86949	Fxr2_P2	protein_coding	P2
chr10	56244692	56244710	+	0.996313	Fxr2_P3	protein_coding	P3
chr10	56255662	56255726	+	0.626894	Fxr2_P4	protein_coding	P4
chr10	56260495	56260554	+	2.37324	Sox15_P1	protein_coding	P1
chr10	56364953	56364961	+	0.962729	chr10:56364953:56364961:+_P1	.	UN
chr10	56371869	56371926	+	29.0386	chr10:56371869:56371926:+_P1	.	UN
chr10	56381808	56381835	+	1.6456	Zbtb4_P1	protein_coding	P1
chr10	56445966	56446077	+	70.9229	Tmem256_P1	protein_coding	P1
chr10	56446410	56446438	+	0.559726	Tmem256_P3	protein_coding	P3
chr10	56446882	56446908	+	0.755631	Tmem256_P2	protein_coding	P2
chr10	56453568	56453592	+	0.632491	Plscr3_P4	protein_coding	P4
chr10	56453800	56453949	+	15.219	Plscr3_P1	protein_coding	P1
chr10	56454117	56454223	+	2.84341	Plscr3_P3	protein_coding	P3
chr10	56454457	56454556	+	3.63262	Plscr3_P2	protein_coding	P2
chr10	56512538	56512614	+	2.19413	Neurl4_P1	protein_coding	P1
chr10	56524400	56524538	+	35.8281	Gps2_P1	protein_coding	P1
chr10	56546559	56546750	+	2.09897	Ybx2_P1	protein_coding	P1
chr10	56590656	56590875	+	47.7727	AABR07029863.2_P1	miRNA	P1
chr10	56591027	56591538	+	19.4897	Ctdnep1_P1	protein_coding	P1
chr10	56600069	56600127	+	0.738839	Ctdnep1_P2	protein_coding	P2
chr10	56600915	56600972	+	1.4385	Gabarap_P3	protein_coding	P3
chr10	56601074	56601420	+	326.813	Gabarap_P1	protein_coding	P1
chr10	56601966	56601979	+	1.2202	Gabarap_P4	protein_coding	P4
chr10	56602273	56602297	+	0.90116	Gabarap_P5	protein_coding	P5
chr10	56603786	56603984	+	8.65897	Gabarap_P2	protein_coding	P2
chr10	56605009	56605235	+	25.5851	Phf23_P1	protein_coding	P1
chr10	56606201	56606315	+	1.41611	Phf23_P2	protein_coding	P2
chr10	56608064	56608067	+	1.05229	Phf23_P3	protein_coding	P3
chr10	56609779	56609871	+	8.05446	Dvl2_P1	protein_coding	P1
chr10	56610018	56610068	+	0.498157	Dvl2_P2	protein_coding	P2
chr10	56624129	56624170	+	0.833992	chr10:56624129:56624170:+_P1	.	UN
chr10	56627108	56627163	+	2.0542	Dlg4_P1	protein_coding	P1
chr10	56635923	56636006	+	1.46648	Dlg4_P2	protein_coding	P2
chr10	56715854	56715886	+	1.0131	Asgr2_P1	protein_coding	P1
chr10	56764882	56764993	+	3.21283	Clec10a_P1	protein_coding	P1
chr10	56824086	56824169	+	1.13624	Slc16a11_P1	protein_coding	P1
chr10	57040205	57040313	+	12.1125	Arrb2_P1	protein_coding	P1
chr10	57057571	57057661	+	5.06552	Med11_P1	protein_coding	P1
chr10	57058843	57058844	+	0.694061	Med11_P2	protein_coding	P2
chr10	57131290	57131472	+	269.648	Psmb6_P1	protein_coding	P1
chr10	57131872	57131937	+	3.44232	Psmb6_P2	protein_coding	P2
chr10	57132283	57132320	+	0.638088	Psmb6_P5	protein_coding	P5
chr10	57132624	57132662	+	0.761228	Psmb6_P4	protein_coding	P4
chr10	57133234	57133277	+	0.878771	Psmb6_P3	protein_coding	P3
chr10	57162545	57162648	+	7.58989	Pld2_P1	protein_coding	P1
chr10	57185279	57185555	+	57.4391	Mink1_P1	protein_coding	P1
chr10	57222247	57222285	+	0.649283	Mink1_P2	protein_coding	P2
chr10	57260690	57260719	+	0.710853	Gp1ba_P1	protein_coding	P1
chr10	57268312	57268494	+	58.3907	Rnf167_P1	protein_coding	P1
chr10	57268600	57268768	+	17.2004	Rnf167_P2	protein_coding	P2
chr10	57268872	57268883	+	0.375017	Rnf167_P4	protein_coding	P4
chr10	57271103	57271111	+	0.65488	Rnf167_P3	protein_coding	P3
chr10	57278226	57278371	+	275.094	Eno3_P1	protein_coding	P1
chr10	57278812	57279055	+	20.3125	Eno3_P2	protein_coding	P2
chr10	57279291	57279386	+	6.01706	Eno3_P3	protein_coding	P3
chr10	57281906	57281987	+	2.16614	Eno3_P4	protein_coding	P4
chr10	57283132	57283164	+	0.806006	Eno3_P5	protein_coding	P5
chr10	57321937	57322624	+	172.732	Kif1c_P1	protein_coding	P1
chr10	57324064	57324308	+	14.5809	Kif1c_P2	protein_coding	P2
chr10	57324566	57324691	+	12.3476	Kif1c_P3	protein_coding	P3
chr10	57325504	57325671	+	5.5189	Kif1c_P4	protein_coding	P4
chr10	57351085	57351102	+	2.14935	Kif1c_P5	protein_coding	P5
chr10	57386571	57386695	+	1.99822	Zfp3_P2	protein_coding	P2
chr10	57386820	57386925	+	7.92573	Zfp3_P1	protein_coding	P1
chr10	57462264	57462344	+	22.1092	Rabep1_P1	protein_coding	P1
chr10	57606603	57606668	+	26.1	Rpain_P1	protein_coding	P1
chr10	57653643	57653776	+	11.7654	chr10:57653643:57653776:+_P1	.	UN
chr10	57653882	57654023	+	9.50975	chr10:57653882:57654023:+_P1	.	UN
chr10	58333618	58333691	+	4.62334	Wscd1_P1	protein_coding	P1
chr10	58342573	58342594	+	0.341433	Wscd1_P2	protein_coding	P2
chr10	58613611	58613670	+	2.64191	Pimreg_P1	protein_coding	P1
chr10	58776773	58777009	+	69.0814	Txndc17_P1	protein_coding	P1
chr10	58777498	58777536	+	1.2258	Txndc17_P2	protein_coding	P2
chr10	58784444	58784526	+	1.88068	LOC100912483_P1	protein_coding	P1
chr10	58860855	58860935	+	11.5136	Xaf1_P1	protein_coding	P1
chr10	59000378	59000449	+	46.6812	Mybbp1a_P1	protein_coding	P1
chr10	59173168	59173421	+	83.1977	Ube2g1_P1	protein_coding	P1
chr10	59259905	59259979	+	22.5626	Ankfy1_P1	protein_coding	P1
chr10	59360813	59360929	+	6.45365	Zzef1_P1	protein_coding	P1
chr10	59529705	59529791	+	4.65692	Atp2a3_P1	protein_coding	P1
chr10	59566216	59566254	+	0.621296	Itgae_P3	protein_coding	P3
chr10	59585006	59585108	+	1.60082	Itgae_P2	protein_coding	P2
chr10	59613331	59613421	+	23.4301	Ncbp3_P1	protein_coding	P1
chr10	59698260	59698383	+	15.6444	Itgae_P1	protein_coding	P1
chr10	59725395	59725737	+	20.5252	P2rx5_P1	protein_coding	P1
chr10	59743475	59743572	+	34.3448	Tax1bp3_P1	protein_coding	P1
chr10	59746407	59746469	+	0.750033	Tax1bp3_P2	protein_coding	P2
chr10	59747552	59747560	+	0.453378	Tax1bp3_P3	protein_coding	P3
chr10	59765254	59765340	+	2.47399	Shpk_P1	protein_coding	P1
chr10	61317457	61317569	+	2.19413	chr10:61317457:61317569:+_P1	.	UN
chr10	61432633	61433050	+	177.629	Cluh_P1	protein_coding	P1
chr10	61436261	61436487	+	5.7372	Cluh_P3	protein_coding	P3
chr10	61436809	61437009	+	6.29692	Cluh_P2	protein_coding	P2
chr10	61440584	61440634	+	2.68109	Cluh_P4	protein_coding	P4
chr10	61443025	61443155	+	2.0542	Cluh_P5	protein_coding	P5
chr10	61626584	61626692	+	9.94634	Mettl16_P1	protein_coding	P1
chr10	61685145	61685353	+	17.2396	Mnt_P1	protein_coding	P1
chr10	61685547	61685612	+	0.889965	Mnt_P2	protein_coding	P2
chr10	61744593	61744821	+	5.26143	chr10:61744593:61744821:+_P1	.	UN
chr10	61745135	61745321	+	1.80232	Tsr1_P2	protein_coding	P2
chr10	61746050	61746112	+	13.4782	Tsr1_P1	protein_coding	P1
chr10	62035658	62035767	+	5.47972	Rtn4rl1_P1	protein_coding	P1
chr10	62035883	62035888	+	0.71645	Rtn4rl1_P2	protein_coding	P2
chr10	62191585	62191728	+	2.8602	Smyd4_P2	protein_coding	P2
chr10	62191834	62191963	+	3.92928	Smyd4_P1	protein_coding	P1
chr10	62296565	62296608	+	0.666074	chr10:62296565:62296608:+_P1	.	UN
chr10	62297491	62297577	+	15.135	chr10:62297491:62297577:+_P1	.	UN
chr10	62505909	62505933	+	1.52805	chr10:62505909:62505933:+_P1	.	UN
chr10	62648979	62649188	+	8.55262	chr10:62648979:62649188:+_P1	.	UN
chr10	62650621	62650770	+	5.83795	Tp53i13_P1	protein_coding	P1
chr10	62674080	62674116	+	1.00751	Ankrd13b_P1	protein_coding	P1
chr10	62699553	62699558	+	0.486962	chr10:62699553:62699558:+_P1	.	UN
chr10	63098068	63098122	+	30.8521	Nsrp1_P1	protein_coding	P1
chr10	63325700	63325982	+	119.938	Cpd_P1	protein_coding	P1
chr10	63405555	63405612	+	27.5217	Gosr1_P1	protein_coding	P1
chr10	63635219	63635326	+	41.6157	Prpf8_P1	protein_coding	P1
chr10	63658896	63659280	+	46.323	Rilp_P1	protein_coding	P1
chr10	63662895	63662991	+	8.30634	Scarf1_P1	protein_coding	P1
chr10	63677379	63677461	+	2.33966	Slc43a2_P2	protein_coding	P2
chr10	63677771	63677871	+	3.42553	Slc43a2_P1	protein_coding	P1
chr10	63731668	63731931	+	121.069	Pitpna_P1	protein_coding	P1
chr10	63741799	63741921	+	3.51508	Pitpna_P2	protein_coding	P2
chr10	63776027	63776328	+	11.0714	Inpp5k_P1	protein_coding	P1
chr10	63797972	63798145	+	16.9709	chr10:63797972:63798145:+_P1	.	UN
chr10	63798918	63799105	+	30.5891	chr10:63798918:63799105:+_P1	.	UN
chr10	63801395	63801658	+	2.06539	chr10:63801395:63801658:+_P1	.	UN
chr10	63803030	63803517	+	63.9879	Myo1c_P1	protein_coding	P1
chr10	63804739	63804874	+	2.2557	Myo1c_P2	protein_coding	P2
chr10	63805607	63805640	+	0.486962	Myo1c_P5	protein_coding	P5
chr10	63805747	63805780	+	0.934743	Myo1c_P3	protein_coding	P3
chr10	63808033	63808036	+	0.520546	Myo1c_P4	protein_coding	P4
chr10	63829790	63829929	+	73.9678	Crk_P1	protein_coding	P1
chr10	63840631	63840636	+	0.895562	Crk_P2	protein_coding	P2
chr10	63884244	63884511	+	442.43	Ywhae_P1	protein_coding	P1
chr10	63908526	63908723	+	3.52628	Ywhae_P3	protein_coding	P3
chr10	63912248	63912359	+	2.42921	Ywhae_P5	protein_coding	P5
chr10	63914894	63915029	+	2.73147	Ywhae_P4	protein_coding	P4
chr10	63920810	63920963	+	4.58416	Ywhae_P2	protein_coding	P2
chr10	64336184	64336344	+	47.1849	LOC100360841_P1	protein_coding	P1
chr10	64341075	64341121	+	3.66621	chr10:64341075:64341121:+_P1	.	UN
[truncated: 22,961 more rows]
