# Supplementary material for: Cap analysis of gene expression reveals alternative promoter usage in a rat model of hypertension
Source: Life Sci Alliance. 2022 Jan 7;5(4):e202101234. doi: 10.26508/lsa.202101234 (PMC8742872; doi:10.26508/lsa.202101234)
Supplement: Supplementary file 2 [file LSA-2021-01234_TableS1.xlsx]

## Sheet: GeneBody_TC_with_stringtie_supp
Table S1: List of CAGE defined tag clusters located in gene body win no ENSEMBL TSS annotation but supported by de-novo transcript assemby
CAGE Tag Cluster							Stringtie TSS
Chr	Start	End	Strand	TPM	Promoter ID	Gene Type	Chr	Start	End	Strand	Distance from TC
chr1	2817919	2818055	-	2.28928	Sash1_P2	protein_coding	chr1	2818124	2818125	-	69
chr1	2823386	2823857	-	7.72982	Sash1_P1	protein_coding	chr1	2823926	2823927	-	69
chr1	13661099	13661276	+	5.03754	Nhsl1_P2	protein_coding	chr1	13661127	13661128	+	0
chr1	16041043	16041151	-	0.912354	Pde7b_P2	protein_coding	chr1	16041354	16041355	-	203
chr1	22759446	22759534	+	4.38266	Rps12_P3	protein_coding	chr1	22759628	22759629	+	94
chr1	22759776	22759806	+	1.0187	Rps12_P4	protein_coding	chr1	22759628	22759629	+	147
chr1	25787653	25787663	-	1.04669	Trdn_P9	protein_coding	chr1	25787618	25787619	-	34
chr1	37937966	37938050	-	7.00778	LOC102549842_P1	protein_coding	chr1	37938441	37938442	-	391
chr1	48207813	48207866	+	1.88628	Igf2r_P2	protein_coding	chr1	48207769	48207770	+	43
chr1	48295795	48295951	+	4.06921	Slc22a1_P1	protein_coding	chr1	48295834	48295835	+	0
chr1	53744385	53744531	-	8.33992	Afdn_P1	protein_coding	chr1	53744504	53744505	-	0
chr1	61403264	61403312	+	0.638088	Zfp52_P1	protein_coding	chr1	61403426	61403427	+	114
chr1	61487517	61487622	+	1.4329	LOC108348215_P1	protein_coding	chr1	61487544	61487545	+	0
chr1	65601640	65601742	-	1.16983	AABR07002065.2_P3	protein_coding	chr1	65602012	65602013	-	270
chr1	65601943	65602023	-	6.11221	AABR07002065.2_P1	protein_coding	chr1	65602012	65602013	-	0
chr1	78755225	78755229	+	0.783617	Strn4_P4	protein_coding	chr1	78755455	78755456	+	226
chr1	78755515	78755604	+	2.37884	Strn4_P2	protein_coding	chr1	78755455	78755456	+	59
chr1	79991456	79991666	+	3.62703	Dmpk_P3	protein_coding	chr1	79991919	79991920	+	253
chr1	80203395	80203513	+	52.2393	Rtn2_P1	protein_coding	chr1	80203091	80203092	+	303
chr1	80703464	80703736	-	64.9283	Cblc_P1	protein_coding	chr1	80703672	80703673	-	0
chr1	81072523	81072597	+	1.70717	AC118165.1_P2	protein_coding	chr1	81072551	81072552	+	0
chr1	81093241	81093299	+	1.38252	AC118165.1_P3	protein_coding	chr1	81093255	81093256	+	0
chr1	81843920	81843943	-	0.279863	Rabac1_P4	protein_coding	chr1	81844016	81844017	-	73
chr1	81844084	81844127	-	0.850784	Rabac1_P3	protein_coding	chr1	81844016	81844017	-	67
chr1	84312739	84312814	+	2.54676	Prx_P1	protein_coding	chr1	84312739	84312740	+	0
chr1	84366909	84367064	+	29.2401	RGD1307554_P1	protein_coding	chr1	84366860	84366861	+	48
chr1	84415307	84415489	+	38.6939	Akt2_P1	protein_coding	chr1	84414943	84414944	+	363
chr1	85406189	85406279	-	1.33775	Rps16_P3	protein_coding	chr1	85406492	85406493	-	213
chr1	85471968	85472094	+	2.84901	Timm50_P2	protein_coding	chr1	85472061	85472062	+	0
chr1	87957606	87957678	+	3.41993	Map4k1_P1	protein_coding	chr1	87957592	87957593	+	13
chr1	89505996	89506092	-	10.5564	Fxyd3_P1	protein_coding	chr1	89506090	89506091	-	0
chr1	89551159	89551200	-	0.688464	Scn1b_P7	protein_coding	chr1	89551426	89551427	-	226
chr1	89585589	89585707	-	12.8681	Gramd1a_P1	protein_coding	chr1	89585669	89585670	-	0
chr1	94385672	94385712	-	0.682866	Uri1_P2	protein_coding	chr1	94386077	94386078	-	365
chr1	100348530	100348773	-	9.08996	RGD1309036_P2	protein_coding	chr1	100349033	100349034	-	260
chr1	100348901	100349048	-	19.1538	RGD1309036_P1	protein_coding	chr1	100349033	100349034	-	0
chr1	100992099	100992208	-	11.6759	Bcl2l12_P1	protein_coding	chr1	100992179	100992180	-	0
chr1	101117242	101117292	-	2.4628	Rps11_P4	protein_coding	chr1	101117546	101117547	-	254
chr1	101117608	101117676	-	2.89938	Rps11_P3	protein_coding	chr1	101117546	101117547	-	61
chr1	101120942	101121033	-	15.4429	Rpl13a_P4	protein_coding	chr1	101121214	101121215	-	181
chr1	101121260	101121319	-	4.7073	Rpl13a_P6	protein_coding	chr1	101121214	101121215	-	45
chr1	101121492	101121577	-	17.2564	Rpl13a_P2	protein_coding	chr1	101121448	101121449	-	43
chr1	101121780	101122043	-	15.2134	Rpl13a_P5	protein_coding	chr1	101121820	101121821	-	0
chr1	101122290	101122362	-	17.0157	Rpl13a_P3	protein_coding	chr1	101122297	101122298	-	0
chr1	101448726	101448815	-	2.62512	LOC100360087_P3	protein_coding	chr1	101448435	101448436	-	290
chr1	101683334	101683430	+	7.40518	Ca11_P1	protein_coding	chr1	101683151	101683152	+	182
chr1	104858213	104858451	+	7.52272	Nav2_P2	protein_coding	chr1	104858248	104858249	+	0
chr1	114772895	114772955	+	1.42171	Oca2_P1	protein_coding	chr1	114772914	114772915	+	0
chr1	128517586	128517703	-	1.80792	Lrrc28_P2	protein_coding	chr1	128517840	128517841	-	137
chr1	134715212	134715302	+	7.90334	Rgma_P2	protein_coding	chr1	134715208	134715209	+	3
chr1	137148815	137148913	+	4.77447	Akap13_P3	protein_coding	chr1	137148868	137148869	+	0
chr1	137176722	137176962	+	3.33037	Akap13_P4	protein_coding	chr1	137176751	137176752	+	0
chr1	137176722	137176962	+	3.33037	Akap13_P4	protein_coding	chr1	137176901	137176902	+	0
chr1	137207342	137207399	+	0.94034	Akap13_P6	protein_coding	chr1	137207566	137207567	+	167
chr1	137207546	137207628	+	5.04873	Akap13_P2	protein_coding	chr1	137207566	137207567	+	0
chr1	141585456	141585503	-	6.83426	Anpep_P1	protein_coding	chr1	141585482	141585483	-	0
chr1	146812559	146812634	-	12.23	Zfand6_P2	protein_coding	chr1	146812610	146812611	-	0
chr1	157592972	157593106	+	2.8602	Rab30_P2	protein_coding	chr1	157593007	157593008	+	0
chr1	164436379	164436486	-	1.18102	Rps3_P6	protein_coding	chr1	164436729	164436730	-	243
chr1	164436946	164437085	-	14.6257	Rps3_P2	protein_coding	chr1	164436729	164436730	-	216
chr1	164440085	164440159	-	2.57474	Rps3_P5	protein_coding	chr1	164440438	164440439	-	279
chr1	166139832	166139860	+	1.46089	Fchsd2_P2	protein_coding	chr1	166140064	166140065	+	204
chr1	166140018	166140043	+	2.40682	Fchsd2_P1	protein_coding	chr1	166140064	166140065	+	21
chr1	166490862	166491079	+	12.314	Arap1_P1	protein_coding	chr1	166490897	166490898	+	0
chr1	167158367	167158409	-	14.4745	Rnf121_P1	protein_coding	chr1	167158527	167158528	-	118
chr1	167195891	167195929	-	1.08587	Art5_P1	protein_coding	chr1	167196080	167196081	-	151
chr1	171888296	171888428	+	3.15126	Ppfibp2_P2	protein_coding	chr1	171888153	171888154	+	142
chr1	174134026	174134087	+	8.63098	Rpl27a_P4	protein_coding	chr1	174133708	174133709	+	317
chr1	174233611	174234112	-	31.8149	St5_P1	protein_coding	chr1	174234459	174234460	-	347
chr1	174234405	174234441	-	1.10266	St5_P5	protein_coding	chr1	174234459	174234460	-	18
chr1	197110514	197110570	+	1.67918	LOC361646_P2	protein_coding	chr1	197110372	197110373	+	141
chr1	198757988	198758048	+	0.71645	Itgal_P2	protein_coding	chr1	198757995	198757996	+	0
chr1	198910805	198910936	-	4.11399	Zfp629_P2	protein_coding	chr1	198910489	198910490	-	315
chr1	201159626	201159697	+	6.20737	Tacc2_P3	protein_coding	chr1	201159430	201159431	+	195
chr1	201209137	201209272	+	1.79672	Tacc2_P4	protein_coding	chr1	201209103	201209104	+	33
chr1	201209386	201209507	+	9.58252	Tacc2_P2	protein_coding	chr1	201209103	201209104	+	282
chr1	207892126	207892174	+	0.65488	Ptpre_P2	protein_coding	chr1	207892047	207892048	+	78
chr1	211560526	211560767	+	34.2497	Lrrc27_P1	protein_coding	chr1	211560584	211560585	+	0
chr1	212594823	212594890	+	9.21869	Paox_P1	protein_coding	chr1	212594856	212594857	+	0
chr1	213903804	213903952	-	4.14198	Sigirr_P1	protein_coding	chr1	213903932	213903933	-	0
chr1	215639298	215639534	+	5.40136	Lsp1_P3	protein_coding	chr1	215639068	215639069	+	229
chr1	215642677	215642944	+	8.49105	Lsp1_P2	protein_coding	chr1	215642705	215642706	+	0
chr1	215843867	215843921	-	1.79112	Igf2_P4	protein_coding	chr1	215843991	215843992	-	70
chr1	219583704	219583906	-	19.652	Kdm2a_P1	protein_coding	chr1	219583883	219583884	-	0
chr1	221309347	221309749	-	31.8652	Pola2_P1	protein_coding	chr1	221309887	221309888	-	138
chr1	221817608	221817673	+	3.08969	Nrxn2_P1	protein_coding	chr1	221817639	221817640	+	0
chr1	222171791	222171859	-	0.850784	Esrra_P3	protein_coding	chr1	222171984	222171985	-	125
chr1	222485367	222485438	-	8.98921	Naa40_P2	protein_coding	chr1	222485192	222485193	-	174
chr1	222525948	222526050	-	9.59931	Mark2_P2	protein_coding	chr1	222525889	222525890	-	58
chr1	222544908	222544965	-	0.861979	Mark2_P4	protein_coding	chr1	222545316	222545317	-	351
chr1	224912580	224912683	-	30.0965	Slc3a2_P1	protein_coding	chr1	224913078	224913079	-	395
chr1	226462941	226463084	+	8.52463	Syt7_P2	protein_coding	chr1	226462602	226462603	+	338
chr1	242024384	242024536	-	2.39563	Tjp2_P2	protein_coding	chr1	242024506	242024507	-	0
chr1	242349719	242349775	-	0.845187	Pip5k1b_P4	protein_coding	chr1	242349758	242349759	-	0
chr1	243347026	243347149	+	4.81365	Kank1_P2	protein_coding	chr1	243346908	243346909	+	117
chr1	243371037	243371444	+	23.6876	Kank1_P1	protein_coding	chr1	243370976	243370977	+	60
chr1	244753904	244753964	+	0.548532	Smarca2_P7	protein_coding	chr1	244753950	244753951	+	0
chr1	244754157	244754237	+	3.8957	Smarca2_P3	protein_coding	chr1	244753950	244753951	+	206
chr1	247084092	247084202	-	6.57119	Spata6l_P1	protein_coding	chr1	247084170	247084171	-	0
chr1	247580852	247580997	+	6.46484	Pdcd1lg2_P1	protein_coding	chr1	247580765	247580766	+	86
chr1	250762967	250763110	-	9.91835	Sgms1_P3	protein_coding	chr1	250763138	250763139	-	28
chr1	250949656	250949769	-	0.945938	Sgms1_P6	protein_coding	chr1	250949695	250949696	-	0
chr1	251373457	251373496	-	0.363822	Atad1_P2	protein_coding	chr1	251373618	251373619	-	122
chr1	255812776	255812888	-	2.4572	Cpeb3_P2	protein_coding	chr1	255813331	255813332	-	443
chr1	266731986	266732061	-	33.0742	Nt5c2_P1	protein_coding	chr1	266732034	266732035	-	0
chr1	267092946	267093044	-	2.64191	Sh3pxd2a_P4	protein_coding	chr1	267093501	267093502	-	457
chr1	267093298	267093432	-	10.4277	Sh3pxd2a_P2	protein_coding	chr1	267093501	267093502	-	69
chr1	267098935	267099002	-	2.79863	Sh3pxd2a_P3	protein_coding	chr1	267099371	267099372	-	369
chr1	267304253	267304373	-	1.57283	Stn1_P3	protein_coding	chr1	267304495	267304496	-	122
chr1	273856414	273856558	+	22.417	Add3_P1	protein_coding	chr1	273856477	273856478	+	0
chr1	273907618	273907715	+	1.52805	Add3_P3	protein_coding	chr1	273907588	273907589	+	29
chr1	275878050	275878171	-	11.4184	Gpam_P2	protein_coding	chr1	275878159	275878160	-	0
chr1	276242276	276242364	+	5.88832	Acsl5_P1	protein_coding	chr1	276242310	276242311	+	0
chr1	276242547	276242584	+	5.03194	Acsl5_P2	protein_coding	chr1	276242310	276242311	+	236
chr1	277224560	277224746	+	7.64586	Casp7_P2	protein_coding	chr1	277224472	277224473	+	87
chr1	277669215	277669378	+	1.2314	Tdrd1_P1	protein_coding	chr1	277669247	277669248	+	0
chr1	278022543	278022850	-	93.4351	AABR07007032.1_P1	protein_coding	chr1	278022760	278022761	-	0
chr10	7043672	7043774	+	2.6531	Carhsp1_P5	protein_coding	chr10	7043686	7043687	+	0
chr10	10603023	10603067	-	0.738839	Sec14l5_P1	protein_coding	chr10	10603048	10603049	-	0
chr10	13047661	13047723	-	3.41433	AABR07029202.1_P1	protein_coding	chr10	13047734	13047735	-	11
chr10	15157277	15157335	+	0.973924	Ccdc78_P2	protein_coding	chr10	15157358	15157359	+	23
chr10	15198244	15198324	-	1.80232	Stub1_P4	protein_coding	chr10	15198530	15198531	-	206
chr10	15198693	15198736	-	0.660477	Stub1_P6	protein_coding	chr10	15198530	15198531	-	162
chr10	15198903	15199066	-	3.20723	Stub1_P3	protein_coding	chr10	15198530	15198531	-	372
chr10	15433575	15433688	-	10.6908	Decr2_P2	protein_coding	chr10	15433727	15433728	-	39
chr10	27975265	27975304	+	1.46648	Gabrb2_P1	protein_coding	chr10	27975290	27975291	+	0
chr10	34151010	34151144	+	4.5058	Rack1_P4	protein_coding	chr10	34151394	34151395	+	250
chr10	34151629	34151759	+	5.78197	Rack1_P3	protein_coding	chr10	34151394	34151395	+	234
chr10	34152690	34152782	+	6.57679	Rack1_P2	protein_coding	chr10	34152284	34152285	+	405
chr10	36716764	36716860	+	15.3533	Clk4_P1	protein_coding	chr10	36716643	36716644	+	120
chr10	37631663	37631715	-	2.55795	Tcf7_P1	protein_coding	chr10	37631700	37631701	-	0
chr10	38663976	38664017	+	13.2655	AABR07072108.1_P1	protein_coding	chr10	38663994	38663995	+	0
chr10	39400783	39400878	-	6.19057	Pdlim4_P2	protein_coding	chr10	39400936	39400937	-	58
chr10	43616616	43616758	+	3.96846	Igtp_P3	protein_coding	chr10	43616651	43616652	+	0
chr10	43631007	43631176	+	11.0882	Igtp_P2	protein_coding	chr10	43631077	43631078	+	0
chr10	46341081	46341131	-	1.04109	Pemt_P1	protein_coding	chr10	46341272	46341273	-	141
chr10	47052223	47052333	-	6.21296	Shmt1_P1	protein_coding	chr10	47052247	47052248	-	0
chr10	48292776	48292841	+	0.833992	Specc1_P2	protein_coding	chr10	48292811	48292812	+	0
chr10	49264041	49264102	+	0.906757	Fbxw10_P1	protein_coding	chr10	49264101	49264102	+	0
chr10	49498825	49498869	+	0.458976	Tekt3_P1	protein_coding	chr10	49498881	49498882	+	12
chr10	54141455	54141675	+	15.2078	Gas7_P1	protein_coding	chr10	54141505	54141506	+	0
chr10	55729100	55729213	+	8.92764	Aloxe3_P1	protein_coding	chr10	55729109	55729110	+	0
chr10	56272375	56272452	-	0.783617	Eif4a1_P5	protein_coding	chr10	56272328	56272329	-	46
chr10	56273429	56273530	-	5.58607	Eif4a1_P3	protein_coding	chr10	56273341	56273342	-	87
chr10	56446882	56446908	+	0.755631	Tmem256_P2	protein_coding	chr10	56446768	56446769	+	113
chr10	56590233	56590316	-	21.7902	Elp5_P1	protein_coding	chr10	56590630	56590631	-	314
chr10	56606201	56606315	+	1.41611	Phf23_P2	protein_coding	chr10	56606255	56606256	+	0
chr10	58333618	58333691	+	4.62334	Wscd1_P1	protein_coding	chr10	58333652	58333653	+	0
chr10	59698260	59698383	+	15.6444	Itgae_P1	protein_coding	chr10	59698291	59698292	+	0
chr10	59746407	59746469	+	0.750033	Tax1bp3_P2	protein_coding	chr10	59746631	59746632	+	162
chr10	61317073	61317442	-	64.5141	Rap1gap2_P1	protein_coding	chr10	61317419	61317420	-	0
chr10	61436809	61437009	+	6.29692	Cluh_P2	protein_coding	chr10	61437239	61437240	+	230
chr10	61443025	61443155	+	2.0542	Cluh_P5	protein_coding	chr10	61443465	61443466	+	310
chr10	61728126	61728315	-	39.4831	Sgsm2_P1	protein_coding	chr10	61728527	61728528	-	212
chr10	62020501	62020548	-	8.98921	Dph1_P1	protein_coding	chr10	62020503	62020504	-	0
chr10	64522639	64522726	-	2.42921	Nxn_P2	protein_coding	chr10	64522769	64522770	-	43
chr10	67585616	67585660	+	2.07099	Rhot1_P4	protein_coding	chr10	67585208	67585209	+	407
chr10	67586215	67586284	+	2.6643	Rhot1_P3	protein_coding	chr10	67586231	67586232	+	0
chr10	70302677	70302709	+	0.4086	Slfn5_P5	protein_coding	chr10	70302278	70302279	+	398
chr10	73989782	73990095	-	9.02839	Vmp1_P2	protein_coding	chr10	73990157	73990158	-	62
chr10	74742591	74742593	+	1.28737	Tex14_P1	protein_coding	chr10	74742591	74742592	+	0
chr10	74883213	74883248	+	0.436587	Sept4_P4	protein_coding	chr10	74883172	74883173	+	40
chr10	77539685	77539806	+	2.55235	Tmem100_P2	protein_coding	chr10	77539734	77539735	+	0
chr10	85390751	85390864	+	7.58429	Arhgap23_P1	protein_coding	chr10	85390789	85390790	+	0
chr10	85980876	85980995	+	15.2525	Rpl19_P3	protein_coding	chr10	85980896	85980897	+	0
chr10	85981322	85981409	+	13.495	Rpl19_P5	protein_coding	chr10	85980896	85980897	+	425
chr10	86551774	86551951	-	110.484	Ormdl3_P1	protein_coding	chr10	86551868	86551869	-	0
chr10	87137910	87137992	-	36.2031	Smarce1_P1	protein_coding	chr10	87137964	87137965	-	0
chr10	87192059	87192156	-	5.30061	Krt24_P1	protein_coding	chr10	87192096	87192097	-	0
chr10	88718113	88718164	-	0.973924	Stat5b_P3	protein_coding	chr10	88718337	88718338	-	173
chr10	89216823	89216857	-	0.828395	Becn1_P3	protein_coding	chr10	89217146	89217147	-	289
chr10	89942693	89942810	-	6.64395	Mpp3_P1	protein_coding	chr10	89943104	89943105	-	294
chr10	89943037	89943122	-	1.06348	Mpp3_P2	protein_coding	chr10	89943104	89943105	-	0
chr10	90980351	90980437	-	1.51126	Eftud2_P2	protein_coding	chr10	90980402	90980403	-	0
chr10	91147642	91147815	+	7.26525	Nmt1_P2	protein_coding	chr10	91147337	91147338	+	304
chr10	91260387	91260465	+	0.649283	Fmnl1_P2	protein_coding	chr10	91260404	91260405	+	0
chr10	93601979	93602037	-	2.8546	March10_P1	protein_coding	chr10	93602037	93602038	-	0
chr10	94982255	94982291	-	4.22593	Ddx5_P4	protein_coding	chr10	94982116	94982117	-	138
chr10	95961871	95961930	-	0.761228	Cacng4_P1	protein_coding	chr10	95961849	95961850	-	21
chr10	103608851	103608947	-	3.0785	Cd300e_P1	protein_coding	chr10	103609257	103609258	-	310
chr10	105201445	105201461	-	0.53174	Srp68_P2	protein_coding	chr10	105201527	105201528	-	66
chr10	105201817	105201917	-	38.6659	Srp68_P1	protein_coding	chr10	105201527	105201528	-	289
chr10	106307015	106307073	+	2.06539	Sept9_P2	protein_coding	chr10	106306946	106306947	+	68
chr10	106307715	106307775	+	3.58785	Sept9_P1	protein_coding	chr10	106307441	106307442	+	273
chr10	106836957	106837071	+	2.97215	Afmid_P1	protein_coding	chr10	106836984	106836985	+	0
chr10	106994595	106994687	+	10.5173	Pgs1_P1	protein_coding	chr10	106994639	106994640	+	0
chr10	107461550	107461637	+	2.40682	C1qtnf1_P2	protein_coding	chr10	107461396	107461397	+	153
chr10	108545274	108545295	+	1.64	Rnf213_P2	protein_coding	chr10	108545427	108545428	+	132
chr11	9731950	9732033	+	1.34894	Robo1_P1	protein_coding	chr11	9731994	9731995	+	0
chr11	31965639	31965674	+	0.514948	Itsn1_P2	protein_coding	chr11	31965662	31965663	+	0
chr11	33925462	33925564	+	16.025	Dop1b_P1	protein_coding	chr11	33925490	33925491	+	0
chr11	33925462	33925564	+	16.025	Dop1b_P1	protein_coding	chr11	33925497	33925498	+	0
chr11	34643492	34643589	+	13.3159	Ttc3_P2	protein_coding	chr11	34643506	34643507	+	0
chr11	34879056	34879081	+	1.36014	Dyrk1a_P1	protein_coding	chr11	34879041	34879042	+	14
chr11	35579985	35580067	+	0.912354	Kcnj15_P1	protein_coding	chr11	35580005	35580006	+	0
chr11	35580217	35580234	+	0.4086	Kcnj15_P2	protein_coding	chr11	35580005	35580006	+	211
chr11	36501990	36502112	+	6.86784	Wrb_P2	protein_coding	chr11	36501810	36501811	+	179
chr11	37931245	37931297	-	0.436587	Fam3b_P1	protein_coding	chr11	37931305	37931306	-	8
chr11	45078975	45079068	-	38.0838	Filip1l_P1	protein_coding	chr11	45079078	45079079	-	10
chr11	57386818	57387062	+	44.0673	Phldb2_P1	protein_coding	chr11	57386923	57386924	+	0
chr11	62269405	62269813	-	13.6069	Zbtb20_P2	protein_coding	chr11	62269944	62269945	-	131
chr11	62270453	62270654	-	33.9138	Zbtb20_P1	protein_coding	chr11	62270776	62270777	-	122
chr11	65055835	65055909	+	2.16054	Nr1i2_P1	protein_coding	chr11	65055872	65055873	+	0
chr11	69068732	69068836	-	4.40505	Mylk_P2	protein_coding	chr11	69068784	69068785	-	0
chr11	69091269	69091321	-	2.70908	Mylk_P3	protein_coding	chr11	69091517	69091518	-	196
chr11	69099487	69099768	-	21.8909	Mylk_P1	protein_coding	chr11	69099694	69099695	-	0
chr11	69916965	69917205	+	30.0181	Kalrn_P1	protein_coding	chr11	69916892	69916893	+	72
chr11	69930789	69930879	+	0.537337	Kalrn_P2	protein_coding	chr11	69930629	69930630	+	159
chr11	71215223	71215303	+	1.25379	LOC100910650_P1	protein_coding	chr11	71215110	71215111	+	112
chr11	81375440	81375463	-	0.324641	Eif4a2_P8	protein_coding	chr11	81375384	81375385	-	55
chr11	81377125	81377181	-	0.694061	Eif4a2_P4	protein_coding	chr11	81377046	81377047	-	78
chr11	81377296	81377354	-	0.666074	Eif4a2_P5	protein_coding	chr11	81377046	81377047	-	249
chr11	81378171	81378219	-	0.705255	Eif4a2_P3	protein_coding	chr11	81378463	81378464	-	244
chr11	86750482	86750578	-	5.94989	Arvcf_P1	protein_coding	chr11	86750523	86750524	-	0
chr11	86898444	86898515	+	1.51126	Ranbp1_P2	protein_coding	chr11	86897948	86897949	+	495
chr11	86910685	86910690	+	0.733242	Zdhhc8_P2	protein_coding	chr11	86910200	86910201	+	484
chr12	571058	571059	-	0.957132	N4bp2l1_P1	protein_coding	chr12	571058	571059	-	0
chr12	1128655	1128996	-	4.84723	Stard13_P2	protein_coding	chr12	1128959	1128960	-	0
chr12	1935831	1935910	+	8.14402	Arhgef18_P1	protein_coding	chr12	1935871	1935872	+	0
chr12	5785907	5786432	-	57.3496	Fry_P1	protein_coding	chr12	5786858	5786859	-	426
chr12	7084937	7085072	+	3.683	AABR07035218.1_P2	protein_coding	chr12	7085006	7085007	+	0
chr12	9997224	9997328	-	12.6274	Rpl21_P1	protein_coding	chr12	9997740	9997741	-	412
chr12	11143054	11143091	-	2.39003	Zfp655_P2	protein_coding	chr12	11143174	11143175	-	83
chr12	11247449	11247561	+	3.90689	Pdap1_P3	protein_coding	chr12	11247175	11247176	+	273
chr12	11473794	11473839	+	1.81911	Smurf1_P2	protein_coding	chr12	11473831	11473832	+	0
chr12	12757195	12757255	-	1.51126	Eif2ak1_P2	protein_coding	chr12	12757216	12757217	-	0
chr12	13045212	13045354	-	2.61392	Fam220a_P2	protein_coding	chr12	13045595	13045596	-	241
chr12	17366347	17366449	+	3.43672	LOC498154_P1	protein_coding	chr12	17366210	17366211	+	136
chr12	19238244	19238256	+	0.923549	Zkscan1_P2	protein_coding	chr12	19238093	19238094	+	150
chr12	22729704	22729846	+	2.42921	Znhit1_P3	protein_coding	chr12	22729491	22729492	+	212
chr12	23760722	23760807	+	11.6759	Ssc4d_P1	protein_coding	chr12	23760735	23760736	+	0
chr12	23760919	23761029	+	1.12505	Ssc4d_P2	protein_coding	chr12	23760735	23760736	+	183
chr12	23761230	23761320	+	0.554129	Ssc4d_P3	protein_coding	chr12	23760735	23760736	+	494
chr12	24238087	24238355	+	2.76505	Hip1_P2	protein_coding	chr12	24238273	24238274	+	0
chr12	25046961	25047042	+	0.979521	Limk1_P2	protein_coding	chr12	25046843	25046844	+	117
chr12	30160852	30160970	-	11.8438	Crcp_P1	protein_coding	chr12	30160891	30160892	-	0
chr12	30160852	30160970	-	11.8438	Crcp_P1	protein_coding	chr12	30160942	30160943	-	0
chr12	31544211	31544392	+	13.7917	Rimbp2_P1	protein_coding	chr12	31544234	31544235	+	0
chr12	37573459	37573615	-	2.70908	Kmt5a_P4	protein_coding	chr12	37574032	37574033	-	417
chr12	38364038	38364219	+	6.91262	Clip1_P2	protein_coding	chr12	38364108	38364109	+	0
chr12	38733882	38733955	-	1.32095	Wdr66_P1	protein_coding	chr12	38733903	38733904	-	0
chr12	38829727	38829864	+	2.95536	Hpd_P1	protein_coding	chr12	38829742	38829743	+	0
chr12	39130905	39131027	+	3.81733	Kdm2b_P1	protein_coding	chr12	39130917	39130918	+	0
chr12	40062112	40062188	+	1.19222	Cux2_P1	protein_coding	chr12	40062141	40062142	+	0
chr12	42099583	42099877	+	9.44818	Tbx5_P2	protein_coding	chr12	42099100	42099101	+	482
chr12	45072066	45072098	-	0.486962	Taok3_P2	protein_coding	chr12	45071903	45071904	-	162
chr12	45872389	45872517	+	13.2487	Srrm4_P1	protein_coding	chr12	45872485	45872486	+	0
chr12	46823163	46823328	-	2.61952	Pxn_P2	protein_coding	chr12	46823313	46823314	-	0
chr12	48000412	48000504	+	10.5396	Kctd10_P2	protein_coding	chr12	48000412	48000413	+	0
chr12	51303474	51303676	-	32.2514	Pitpnb_P2	protein_coding	chr12	51303780	51303781	-	104
chr13	26255835	26255944	+	0.822798	Phlpp1_P2	protein_coding	chr13	26255873	26255874	+	0
chr13	41884238	41884326	+	1.53925	Slc35f5_P3	protein_coding	chr13	41884096	41884097	+	141
chr13	47439442	47439558	-	18.7676	Pfkfb2_P1	protein_coding	chr13	47439547	47439548	-	0
chr13	48531418	48531517	+	2.19413	Slc26a9_P1	protein_coding	chr13	48531459	48531460	+	0
chr13	48920183	48920349	-	3.24082	Cdk18_P1	protein_coding	chr13	48920345	48920346	-	0
chr13	49145941	49145987	-	12.689	Tmcc2_P2	protein_coding	chr13	49146265	49146266	-	278
chr13	49168728	49168758	-	0.475767	Tmcc2_P3	protein_coding	chr13	49168709	49168710	-	18
chr13	50874811	50874910	+	4.086	Fmod_P1	protein_coding	chr13	50874699	50874700	+	111
chr13	50986186	50986245	+	1.12505	Chit1_P1	protein_coding	chr13	50986208	50986209	+	0
chr13	68702754	68702894	+	210.435	Ivns1abp_P1	protein_coding	chr13	68702819	68702820	+	0
chr13	68702754	68702894	+	210.435	Ivns1abp_P1	protein_coding	chr13	68702878	68702879	+	0
chr13	70019480	70019807	-	73.0387	Rgl1_P1	protein_coding	chr13	70019810	70019811	-	3
chr13	70574733	70574848	-	2.83781	Lamc2_P2	protein_coding	chr13	70575082	70575083	-	234
chr13	74888687	74888768	-	1.76314	Rasal2_P3	protein_coding	chr13	74888765	74888766	-	0
chr13	78982854	78982937	+	1.77993	AC127084.1_P1	protein_coding	chr13	78982629	78982630	+	224
chr13	80856039	80856108	-	4.03563	Fmo3_P1	protein_coding	chr13	80856085	80856086	-	0
chr13	85840024	85840293	+	39.0409	Rxrg_P1	protein_coding	chr13	85839899	85839900	+	124
chr13	89559817	89559903	-	1.36573	Pcp4l1_P2	protein_coding	chr13	89560004	89560005	-	101
chr13	90209942	90209958	+	0.968327	Slamf1_P1	protein_coding	chr13	90209936	90209937	+	5
chr13	91161968	91162054	-	0.677269	Fcgr2a_P1	protein_coding	chr13	91161989	91161990	-	0
chr13	100321632	100321778	-	58.5194	Enah_P1	protein_coding	chr13	100321739	100321740	-	0
chr13	101515415	101515573	-	1.77993	Disp1_P2	protein_coding	chr13	101515628	101515629	-	55
chr13	102731809	102731820	-	0.419795	Marc2_P2	protein_coding	chr13	102731794	102731795	-	14
chr13	109990498	109990584	-	2.33406	Nenf_P2	protein_coding	chr13	109990876	109990877	-	292
chr13	111752945	111753101	-	7.66265	Syt14_P1	protein_coding	chr13	111753052	111753053	-	0
chr13	112049158	112049236	+	0.83959	Lamb3_P1	protein_coding	chr13	112049034	112049035	+	123
chr13	113395547	113395582	+	1.25938	Plxna2_P2	protein_coding	chr13	113395496	113395497	+	50
chr14	2861675	2861759	-	2.39563	Rpl5_P6	protein_coding	chr14	2861610	2861611	-	64
chr14	2863996	2864173	-	5.05993	Rpl5_P4	protein_coding	chr14	2864333	2864334	-	160
chr14	2864490	2864695	-	11.9893	Rpl5_P2	protein_coding	chr14	2864333	2864334	-	156
chr14	2864797	2864804	-	2.51317	Rpl5_P5	protein_coding	chr14	2864333	2864334	-	463
chr14	2897994	2898331	+	30.8409	Evi5_P1	protein_coding	chr14	2898013	2898014	+	0
chr14	3429066	3429103	-	0.688464	Brdt_P1	protein_coding	chr14	3429111	3429112	-	8
chr14	11994175	11994214	+	1.69037	Rasgef1b_P1	protein_coding	chr14	11994239	11994240	+	25
chr14	16687833	16688037	-	23.1111	Shroom3_P2	protein_coding	chr14	16687985	16687986	-	0
chr14	16779652	16779873	-	29.9342	Shroom3_P1	protein_coding	chr14	16779881	16779882	-	8
chr14	20770073	20770148	-	2.61392	Slc4a4_P2	protein_coding	chr14	20770468	20770469	-	320
chr14	20773986	20774190	-	1.8471	Slc4a4_P3	protein_coding	chr14	20774323	20774324	-	133
chr14	33151962	33152019	-	0.587713	Rest_P2	protein_coding	chr14	33152091	33152092	-	72
chr14	33597492	33597566	+	1.90867	Ppat_P3	protein_coding	chr14	33597491	33597492	+	0
chr14	35577529	35577600	-	3.75017	Pdgfra_P2	protein_coding	chr14	35577577	35577578	-	0
chr14	36469853	36469959	+	25.5235	Scfd2_P1	protein_coding	chr14	36469882	36469883	+	0
chr14	44526396	44526525	+	9.27467	LOC100364457_P2	protein_coding	chr14	44526407	44526408	+	0
chr14	44526841	44526895	+	2.27809	LOC100364457_P3	protein_coding	chr14	44526407	44526408	+	433
chr14	45722953	45723139	-	8.16641	Tbc1d1_P1	protein_coding	chr14	45723064	45723065	-	0
chr14	80256117	80256160	+	0.582115	Htra3_P2	protein_coding	chr14	80256120	80256121	+	0
chr14	80256546	80256612	+	0.481365	Htra3_P3	protein_coding	chr14	80256120	80256121	+	425
chr14	81038099	81038142	-	0.985119	Rgs12_P1	protein_coding	chr14	81038171	81038172	-	29
chr14	81464638	81464693	-	0.861979	Sh3bp2_P2	protein_coding	chr14	81464710	81464711	-	17
chr14	83561675	83561678	+	0.615699	Pik3ip1_P3	protein_coding	chr14	83562098	83562099	+	420
chr14	86151720	86151821	-	0.985119	Gck_P1	protein_coding	chr14	86152019	86152020	-	198
chr14	86675864	86675893	+	1.19222	Ppia_P2	protein_coding	chr14	86675817	86675818	+	46
chr14	88710029	88710204	-	11.049	Tns3_P1	protein_coding	chr14	88710127	88710128	-	0
chr14	88746550	88746624	-	2.30048	Tns3_P3	protein_coding	chr14	88746571	88746572	-	0
chr14	103313269	103313365	-	5.17747	Meis1_P2	protein_coding	chr14	103313385	103313386	-	20
chr14	107024438	107024892	-	48.0917	Ehbp1_P1	protein_coding	chr14	107024715	107024716	-	0
chr14	107024438	107024892	-	48.0917	Ehbp1_P1	protein_coding	chr14	107024865	107024866	-	0
chr14	107125298	107125517	-	6.33051	Ehbp1_P2	protein_coding	chr14	107125320	107125321	-	0
chr14	107302924	107303148	+	4.16436	Tmem17_P1	protein_coding	chr14	107302803	107302804	+	120
chr14	107736700	107736764	-	1.6456	Commd1_P5	protein_coding	chr14	107736856	107736857	-	92
chr14	107748063	107748113	-	5.1215	Commd1_P3	protein_coding	chr14	107748105	107748106	-	0
chr15	4066967	4067025	+	2.16054	Synpo2l_P6	protein_coding	chr15	4067411	4067412	+	386
chr15	28658398	28658479	-	8.64777	Chd8_P2	protein_coding	chr15	28658438	28658439	-	0
chr15	33518964	33519055	-	0.783617	Homez_P1	protein_coding	chr15	33519005	33519006	-	0
chr15	33608255	33608295	-	2.79863	Myh6_P32	protein_coding	chr15	33608471	33608472	-	176
chr15	33639063	33639244	-	1.70157	Myh7_P23	protein_coding	chr15	33639620	33639621	-	376
chr15	33639709	33639906	-	2.05979	Myh7_P22	protein_coding	chr15	33639620	33639621	-	88
chr15	34173229	34173327	+	1.97583	Carmil3_P2	protein_coding	chr15	34173246	34173247	+	0
chr15	34499814	34499868	+	0.861979	Nfatc4_P2	protein_coding	chr15	34499735	34499736	+	78
chr15	41036530	41036536	+	1.72955	Spata13_P2	protein_coding	chr15	41036498	41036499	+	31
chr15	41151221	41151307	+	3.01693	Mipep_P2	protein_coding	chr15	41151240	41151241	+	0
chr15	41487876	41488075	+	9.08996	Sacs_P2	protein_coding	chr15	41487960	41487961	+	0
chr15	42820335	42820373	+	0.772422	Chrna2_P1	protein_coding	chr15	42820347	42820348	+	0
chr15	43906415	43906653	+	8.23358	Ebf2_P1	protein_coding	chr15	43906439	43906440	+	0
chr15	51376193	51376367	-	16.6743	AABR07018321.1_P1	protein_coding	chr15	51376237	51376238	-	0
chr15	51376193	51376367	-	16.6743	AABR07018321.1_P1	protein_coding	chr15	51376322	51376323	-	0
chr15	51884565	51884997	-	21.1856	Sorbs3_P1	protein_coding	chr15	51884850	51884851	-	0
chr15	52065345	52065433	-	5.19426	Piwil2_P1	protein_coding	chr15	52065399	52065400	-	0
chr15	54448349	54448498	-	8.82689	Fndc3a_P1	protein_coding	chr15	54448462	54448463	-	0
chr15	57894331	57894395	+	0.626894	Tpt1_P7	protein_coding	chr15	57894099	57894100	+	231
chr15	82128017	82128037	-	0.604505	Dach1_P3	protein_coding	chr15	82128012	82128013	-	4
chr15	86345204	86345235	+	6.16259	Lmo7_P3	protein_coding	chr15	86345106	86345107	+	97
chr15	86361144	86361222	+	1.4329	Lmo7_P6	protein_coding	chr15	86361063	86361064	+	80
chr15	86361358	86361779	+	8.10484	Lmo7_P2	protein_coding	chr15	86361063	86361064	+	294
chr15	86405481	86405841	+	83.0242	Lmo7_P1	protein_coding	chr15	86405519	86405520	+	0
chr15	90177383	90177390	-	0.486962	Mycbp2_P10	protein_coding	chr15	90177844	90177845	-	454
chr15	90177784	90177932	-	2.31727	Mycbp2_P7	protein_coding	chr15	90177844	90177845	-	0
chr15	90178083	90178146	-	0.621296	Mycbp2_P9	protein_coding	chr15	90177844	90177845	-	238
chr15	104171038	104171072	-	1.70157	Dzip1_P1	protein_coding	chr15	104170958	104170959	-	79
chr15	108290736	108290769	+	0.481365	Ubac2_P3	protein_coding	chr15	108290745	108290746	+	0
chr16	2861003	2861115	+	10.7915	Arhgef3_P1	protein_coding	chr16	2861043	2861044	+	0
chr16	7662311	7662376	-	2.10457	Colq_P2	protein_coding	chr16	7662731	7662732	-	355
chr16	7902737	7902903	-	9.54893	Ankrd28_P1	protein_coding	chr16	7903073	7903074	-	170
chr16	9346892	9346971	-	1.29857	Wdfy4_P1	protein_coding	chr16	9346930	9346931	-	0
chr16	14143345	14143560	-	84.9385	Ccser2_P1	protein_coding	chr16	14143864	14143865	-	304
chr16	20294347	20294747	+	48.198	Rpl18a_P2	protein_coding	chr16	20294775	20294776	+	28
chr16	20294951	20295017	+	1.85269	Rpl18a_P3	protein_coding	chr16	20295091	20295092	+	74
chr16	20449637	20449664	-	1.72955	Pde4c_P1	protein_coding	chr16	20449651	20449652	-	0
chr16	21198188	21198333	+	16.2097	Gatad2a_P1	protein_coding	chr16	21198466	21198467	+	133
chr16	23502285	23502349	+	3.94607	Psd3_P2	protein_coding	chr16	23502345	23502346	+	0
chr16	23504126	23504296	+	7.10293	Psd3_P1	protein_coding	chr16	23504206	23504207	+	0
chr16	32467923	32467974	+	2.14935	Clcn3_P3	protein_coding	chr16	32467977	32467978	+	3
chr16	32475698	32475873	+	30.4715	Clcn3_P1	protein_coding	chr16	32475659	32475660	+	38
chr16	32476125	32476192	+	0.319044	Clcn3_P4	protein_coding	chr16	32475659	32475660	+	465
chr16	40004527	40004605	-	2.56355	Asb5_P1	protein_coding	chr16	40004750	40004751	-	145
chr16	48983613	48983809	-	382.265	Acsl1_P1	protein_coding	chr16	48983830	48983831	-	21
chr16	48986551	48986662	-	1.27618	Acsl1_P9	protein_coding	chr16	48986902	48986903	-	240
chr16	49328452	49328518	+	1.20341	AC130162.1_P2	protein_coding	chr16	49328950	49328951	+	432
chr16	49788047	49788343	-	51.0471	Sorbs2_P2	protein_coding	chr16	49788596	49788597	-	253
chr16	49788596	49788597	-	3.58785	Sorbs2_P6	protein_coding	chr16	49788596	49788597	-	0
chr16	50081911	50081983	+	3.81733	Fam149a_P1	protein_coding	chr16	50081986	50081987	+	3
chr16	50427483	50427561	-	12.1573	Fat1_P2	protein_coding	chr16	50427537	50427538	-	0
chr16	50498801	50499006	-	34.7646	Fat1_P1	protein_coding	chr16	50498955	50498956	-	0
chr16	61807224	61807601	+	77.7404	Dctn6_P1	protein_coding	chr16	61807360	61807361	+	0
chr16	61966577	61966803	+	9.56572	Rbpms_P3	protein_coding	chr16	61966365	61966366	+	211
chr16	61978541	61978663	+	12.8177	Rbpms_P2	protein_coding	chr16	61978373	61978374	+	167
chr16	64784331	64784488	-	15.2078	AABR07026112.1_P1	protein_coding	chr16	64784432	64784433	-	0
chr16	71235982	71235990	-	1.04669	Nsd3_P2	protein_coding	chr16	71236448	71236449	-	458
chr16	74377317	74377726	-	25.1653	Slc20a2_P2	protein_coding	chr16	74377894	74377895	-	168
chr16	81934143	81934355	-	21.0401	Mcf2l_P1	protein_coding	chr16	81934341	81934342	-	0
chr17	763668	763820	+	21.3088	Npepo_P1	protein_coding	chr17	763696	763697	+	0
chr17	801593	801814	+	4.45542	Npepo_P3	protein_coding	chr17	801452	801453	+	140
chr17	1325572	1325719	+	17.5194	Ercc6l2_P1	protein_coding	chr17	1325657	1325658	+	0
chr17	1771301	1771493	-	9.49296	Cdc14b_P1	protein_coding	chr17	1771829	1771830	-	336
chr17	6489599	6489601	+	0.666074	Slc28a3_P1	protein_coding	chr17	6489582	6489583	+	16
chr17	9659520	9659568	+	0.710853	Pdlim7_P5	protein_coding	chr17	9659411	9659412	+	108
chr17	12264543	12264556	+	0.548532	Nfil3_P2	protein_coding	chr17	12264383	12264384	+	159
chr17	15586347	15586434	+	11.9166	Cenpp_P1	protein_coding	chr17	15586382	15586383	+	0
chr17	15942447	15942676	+	8.11044	Wnk2_P2	protein_coding	chr17	15942478	15942479	+	0
chr17	28178728	28178835	-	1.92546	Ly86_P1	protein_coding	chr17	28178807	28178808	-	0
chr17	29809434	29809708	-	10.6348	Cdyl_P1	protein_coding	chr17	29809584	29809585	-	0
chr17	37237467	37237546	+	2.56914	AABR07027567.1_P2	protein_coding	chr17	37237506	37237507	+	0
chr17	42419263	42419545	-	12.1237	Ripor2_P1	protein_coding	chr17	42419353	42419354	-	0
chr17	51909851	51909915	-	0.464573	Inhba_P1	protein_coding	chr17	51910076	51910077	-	161
chr17	53396426	53396431	+	0.430989	Hecw1_P2	protein_coding	chr17	53396500	53396501	+	69
chr17	57367058	57367306	-	20.8834	Epc1_P1	protein_coding	chr17	57367272	57367273	-	0
chr17	57997307	57997492	+	26.8781	Wdr37_P1	protein_coding	chr17	57997370	57997371	+	0
chr17	63269886	63270041	+	27.6505	Larp4b_P1	protein_coding	chr17	63269872	63269873	+	13
chr17	78552693	78552861	-	10.3326	Fam107b_P1	protein_coding	chr17	78552856	78552857	-	0
chr17	78899359	78899458	+	1.37133	Olah_P1	protein_coding	chr17	78899377	78899378	+	0
chr17	81877917	81878182	+	18.874	Cacnb2_P1	protein_coding	chr17	81877798	81877799	+	118
chr17	87396007	87396016	+	0.643685	Etl4_P4	protein_coding	chr17	87396007	87396008	+	0
chr18	4209708	4209731	-	0.850784	Osbpl1a_P3	protein_coding	chr18	4209836	4209837	-	105
chr18	6270909	6270953	+	0.53174	Taf4b_P3	protein_coding	chr18	6270935	6270936	+	0
chr18	6271226	6271275	+	1.53365	Taf4b_P2	protein_coding	chr18	6271243	6271244	+	0
chr18	14807777	14807874	+	10.5341	AABR07031445.1_P2	protein_coding	chr18	14807812	14807813	+	0
chr18	14909225	14909312	+	23.1727	AABR07031445.1_P1	protein_coding	chr18	14909253	14909254	+	0
chr18	17116471	17116502	+	1.20901	Fhod3_P4	protein_coding	chr18	17116551	17116552	+	49
chr18	24419763	24419897	+	16.025	Sap130_P1	protein_coding	chr18	24419821	24419822	+	0
chr18	24420509	24420587	+	2.8602	Sap130_P2	protein_coding	chr18	24420556	24420557	+	0
chr18	25615086	25615177	+	1.57283	Tslp_P1	protein_coding	chr18	25615149	25615150	+	0
chr18	29605214	29605296	+	1.10826	Wdr55_P2	protein_coding	chr18	29605266	29605267	+	0
chr18	43907535	43907596	-	1.04669	Dtwd2_P2	protein_coding	chr18	43907573	43907574	-	0
chr18	44738787	44738941	+	6.3417	Tnfaip8_P1	protein_coding	chr18	44738670	44738671	+	116
chr18	56077844	56078294	+	389.172	Cd74_P1	protein_coding	chr18	56078003	56078004	+	0
chr18	56216718	56216763	+	0.710853	Camk2a_P3	protein_coding	chr18	56216735	56216736	+	0
chr18	60580732	60581079	+	16.3608	Nedd4l_P1	protein_coding	chr18	60580275	60580276	+	456
chr18	63545020	63545281	+	35.9736	Cep192_P1	protein_coding	chr18	63545206	63545207	+	0
chr18	63572092	63572148	+	2.72027	Cep192_P2	protein_coding	chr18	63572115	63572116	+	0
chr18	65156888	65157118	+	7.42757	Tcf4_P3	protein_coding	chr18	65157016	65157017	+	0
chr18	65157347	65157509	+	26.3015	Tcf4_P2	protein_coding	chr18	65157016	65157017	+	330
chr18	65170572	65170619	+	0.945938	Tcf4_P12	protein_coding	chr18	65170547	65170548	+	24
chr18	65324122	65324275	+	3.55986	Tcf4_P7	protein_coding	chr18	65324174	65324175	+	0
chr18	65416932	65417144	+	6.63276	Tcf4_P5	protein_coding	chr18	65416675	65416676	+	256
chr18	65474689	65474737	+	0.542935	Tcf4_P13	protein_coding	chr18	65474476	65474477	+	212
chr18	70612508	70612633	+	1.05788	Myo5b_P2	protein_coding	chr18	70612546	70612547	+	0
chr18	70705196	70705324	+	3.24641	Myo5b_P1	protein_coding	chr18	70705227	70705228	+	0
chr19	10438172	10438295	-	6.59358	Adgrg1_P2	protein_coding	chr19	10438447	10438448	-	152
chr19	10453669	10453903	-	55.0491	Adgrg1_P1	protein_coding	chr19	10454004	10454005	-	101
chr19	10744946	10745055	+	5.49651	Pllp_P1	protein_coding	chr19	10744976	10744977	+	0
chr19	11115282	11115345	-	0.666074	Slc12a3_P1	protein_coding	chr19	11115348	11115349	-	3
chr19	20263200	20263313	+	4.78006	Zfp423_P1	protein_coding	chr19	20263241	20263242	+	0
chr19	24590630	24590737	-	43.6307	Scoc_P1	protein_coding	chr19	24590719	24590720	-	0
chr19	24708248	24708941	-	1151.8	Tecr_P1	protein_coding	chr19	24708486	24708487	-	0
chr19	25710353	25710586	+	2.31167	Cacna1a_P1	protein_coding	chr19	25709949	25709950	+	403
chr19	29835334	29835495	-	10.5005	Inpp4b_P2	protein_coding	chr19	29835462	29835463	-	0
chr19	29919358	29920048	-	22.0532	Inpp4b_P1	protein_coding	chr19	29920004	29920005	-	0
chr19	30803412	30803538	+	15.2973	Gab1_P1	protein_coding	chr19	30803045	30803046	+	366
chr19	37433536	37433785	-	9.33624	Zdhhc1_P2	protein_coding	chr19	37433125	37433126	-	410
chr19	37453973	37454182	-	37.1099	Zdhhc1_P1	protein_coding	chr19	37454259	37454260	-	77
chr19	40890496	40890615	+	1.2202	Il34_P1	protein_coding	chr19	40890296	40890297	+	199
chr19	49159229	49159230	-	0.934743	Cdyl2_P1	protein_coding	chr19	49159229	49159230	-	0
chr19	54110080	54110266	+	2.81542	Gse1_P1	protein_coding	chr19	54110144	54110145	+	0
chr19	57290329	57290395	+	0.973924	Cog2_P2	protein_coding	chr19	57290337	57290338	+	0
chr19	57433976	57434057	-	3.12887	Ttc13_P2	protein_coding	chr19	57434027	57434028	-	0
chr19	58357167	58357270	-	1.4385	Sipa1l2_P2	protein_coding	chr19	58357354	58357355	-	84
chr2	1530794	1530882	-	1.85269	Cast_P2	protein_coding	chr2	1530840	1530841	-	0
chr2	8940488	8940595	-	2.88259	Adgrv1_P2	protein_coding	chr2	8940597	8940598	-	2
chr2	8940773	8940869	-	5.76518	Adgrv1_P1	protein_coding	chr2	8940829	8940830	-	0
chr2	11678132	11678177	+	1.44409	Mef2c_P3	protein_coding	chr2	11678540	11678541	+	363
chr2	11678617	11678804	+	58.4466	Mef2c_P1	protein_coding	chr2	11678690	11678691	+	0
chr2	11727872	11728007	+	11.424	Mef2c_P2	protein_coding	chr2	11727920	11727921	+	0
chr2	21430497	21430607	-	7.72982	Ckmt2_P3	protein_coding	chr2	21430609	21430610	-	2
chr2	21433253	21433344	-	6.7615	Ckmt2_P4	protein_coding	chr2	21433395	21433396	-	51
chr2	26392009	26392096	-	2.14375	Iqgap2_P2	protein_coding	chr2	26392067	26392068	-	0
chr2	30777432	30777522	-	2.61392	Cenph_P1	protein_coding	chr2	30777644	30777645	-	122
chr2	38132261	38132370	+	9.57132	Dimt1_P1	protein_coding	chr2	38132275	38132276	+	0
chr2	41210528	41210708	+	4.00204	Pde4d_P3	protein_coding	chr2	41210507	41210508	+	20
chr2	41417583	41418135	+	8.54702	Pde4d_P2	protein_coding	chr2	41417614	41417615	+	0
chr2	44144534	44144572	+	0.845187	Ankrd55_P1	protein_coding	chr2	44144583	44144584	+	11
chr2	45210819	45210920	+	0.761228	RGD1561161_P2	protein_coding	chr2	45210340	45210341	+	478
chr2	58474822	58474868	+	0.570921	Nadk2_P3	protein_coding	chr2	58474797	58474798	+	24
chr2	58475111	58475112	+	1.25938	Nadk2_P2	protein_coding	chr2	58474797	58474798	+	313
chr2	62590986	62591215	-	8.44067	Pdzd2_P2	protein_coding	chr2	62591536	62591537	-	321
chr2	62591415	62591567	-	14.3626	Pdzd2_P1	protein_coding	chr2	62591536	62591537	-	0
chr2	62591692	62591721	-	0.878771	Pdzd2_P3	protein_coding	chr2	62591686	62591687	-	5
chr2	78214701	78214916	+	12.9745	Zfp622_P2	protein_coding	chr2	78214589	78214590	+	111
chr2	80528538	80528611	-	0.671672	Trio_P1	protein_coding	chr2	80528813	80528814	-	202
chr2	84648115	84648337	+	7.50593	Cmbl_P2	protein_coding	chr2	84647947	84647948	+	167
chr2	104871753	104872212	+	62.3871	Hltf_P1	protein_coding	chr2	104871786	104871787	+	0
chr2	107290432	107290433	+	1.32655	Tbl1xr1_P1	protein_coding	chr2	107290224	107290225	+	207
chr2	116215495	116215583	-	158.817	Sec62_P1	protein_coding	chr2	116215628	116215629	-	45
chr2	127626894	127627102	+	9.34743	Hspa4l_P1	protein_coding	chr2	127626941	127626942	+	0
chr2	128462626	128462688	+	1.38812	Jade1_P2	protein_coding	chr2	128462655	128462656	+	0
chr2	158152062	158152152	-	5.39576	Veph1_P1	protein_coding	chr2	158152282	158152283	-	130
chr2	165695816	165695820	-	1.69597	Kpna4_P3	protein_coding	chr2	165695819	165695820	-	0
chr2	178030599	178030729	-	27.4378	Rapgef2_P1	protein_coding	chr2	178030704	178030705	-	0
chr2	185267945	185268260	+	37.4009	Sh3d19_P1	protein_coding	chr2	185267983	185267984	+	0
chr2	185267945	185268260	+	37.4009	Sh3d19_P1	protein_coding	chr2	185268258	185268259	+	0
chr2	185342095	185342323	+	7.22607	Sh3d19_P2	protein_coding	chr2	185342206	185342207	+	0
chr2	185342095	185342323	+	7.22607	Sh3d19_P2	protein_coding	chr2	185342210	185342211	+	0
chr2	185441074	185441090	-	0.65488	Rps3a_P5	protein_coding	chr2	185441370	185441371	-	280
chr2	185441494	185441691	-	4.39385	Rps3a_P3	protein_coding	chr2	185441370	185441371	-	123
chr2	187912470	187912501	-	0.973924	Lamtor2_P4	protein_coding	chr2	187912263	187912264	-	206
chr2	205628706	205628750	+	0.626894	Dennd2c_P2	protein_coding	chr2	205628573	205628574	+	132
chr2	210299564	210299814	-	12.3588	Slc6a17_P1	protein_coding	chr2	210299769	210299770	-	0
chr2	220486990	220487009	-	0.486962	Palmd_P3	protein_coding	chr2	220487303	220487304	-	294
chr2	226633104	226633209	+	1.73515	Bcar3_P2	protein_coding	chr2	226633009	226633010	+	94
chr2	231428552	231428682	-	4.54498	Ank2_P1	protein_coding	chr2	231428660	231428661	-	0
chr2	243845540	243845699	+	3.64942	Eif4e_P2	protein_coding	chr2	243846073	243846074	+	374
chr2	243845899	243845932	+	0.682866	Eif4e_P5	protein_coding	chr2	243846073	243846074	+	141
chr2	252092692	252092789	+	4.19795	Lpar3_P1	protein_coding	chr2	252092703	252092704	+	0
chr2	252659106	252659337	-	6.26334	Prkacb_P2	protein_coding	chr2	252659498	252659499	-	161
chr2	257036289	257036377	-	0.520546	Ptgfr_P4	protein_coding	chr2	257036134	257036135	-	154
chr2	257308195	257308488	-	44.2464	Gipc2_P1	protein_coding	chr2	257308524	257308525	-	36
chr2	258954632	258954688	-	1.74075	Adgrl2_P4	protein_coding	chr2	258954852	258954853	-	164
chr2	258966388	258966474	-	1.0131	Adgrl2_P5	protein_coding	chr2	258966863	258966864	-	389
chr2	258966639	258966867	-	30.298	Adgrl2_P1	protein_coding	chr2	258966863	258966864	-	0
chr2	258967240	258967263	-	2.50198	Adgrl2_P2	protein_coding	chr2	258966863	258966864	-	376
chr2	258967797	258967904	-	2.35085	Adgrl2_P3	protein_coding	chr2	258968094	258968095	-	190
chr20	4095975	4096020	+	0.833992	RT1-Db1_P3	protein_coding	chr20	4096431	4096432	+	411
chr20	4359309	4359320	+	0.537337	Pbx2_P3	protein_coding	chr20	4359785	4359786	+	465
chr20	4428498	4428600	-	2.22771	LOC103689965_P4	protein_coding	chr20	4428525	4428526	-	0
chr20	4428498	4428600	-	2.22771	LOC103689965_P4	protein_coding	chr20	4428526	4428527	-	0
chr20	4809788	4809803	-	0.71645	RT1-CE4_P11	protein_coding	chr20	4809784	4809785	-	3
chr20	4812553	4812661	-	1.32655	RT1-CE4_P7	protein_coding	chr20	4812424	4812425	-	128
chr20	4873975	4873985	-	12.0677	RT1-CE4_P5	protein_coding	chr20	4873981	4873982	-	0
chr20	5006017	5006176	+	10.1982	Vars_P1	protein_coding	chr20	5006057	5006058	+	0
chr20	5042379	5042454	+	1.77433	Clic1_P2	protein_coding	chr20	5042035	5042036	+	343
chr20	5087556	5087575	+	0.486962	Abhd16a_P3	protein_coding	chr20	5087626	5087627	+	51
chr20	6883851	6883874	+	0.917951	RGD735065_P3	protein_coding	chr20	6883820	6883821	+	30
chr20	6956848	6956897	-	1.90307	Mtch1_P3	protein_coding	chr20	6957145	6957146	-	248
chr20	7374538	7374639	-	8.81569	LOC294154_P2	protein_coding	chr20	7374776	7374777	-	137
chr20	7416896	7417041	+	81.082	Snrpc_P1	protein_coding	chr20	7416938	7416939	+	0
chr20	7555111	7555145	+	0.576518	Anks1a_P4	protein_coding	chr20	7555011	7555012	+	99
chr20	7584365	7584644	+	13.7805	Anks1a_P2	protein_coding	chr20	7584330	7584331	+	34
chr20	9540616	9540707	+	0.59331	Dnah8_P1	protein_coding	chr20	9540627	9540628	+	0
chr20	10169901	10170029	+	4.61774	Pde9a_P1	protein_coding	chr20	10169893	10169894	+	7
chr20	12271665	12271752	+	1.32095	Col18a1_P3	protein_coding	chr20	12271710	12271711	+	0
chr20	12271976	12271990	+	1.38252	Col18a1_P2	protein_coding	chr20	12271710	12271711	+	265
chr20	12610194	12610350	+	3.93488	Pcbp3_P2	protein_coding	chr20	12609793	12609794	+	400
chr20	12974001	12974185	+	9.43139	Pcnt_P2	protein_coding	chr20	12974043	12974044	+	0
chr20	18846930	18846979	+	1.50566	Bicc1_P1	protein_coding	chr20	18846803	18846804	+	126
chr20	20706171	20706267	-	5.5245	Rhobtb1_P2	protein_coding	chr20	20706355	20706356	-	88
chr20	22825718	22826084	-	6.61597	Jmjd1c_P1	protein_coding	chr20	22826058	22826059	-	0
chr20	27380706	27380805	+	1.44969	Tet1_P2	protein_coding	chr20	27380664	27380665	+	41
chr20	27380935	27381003	+	4.96477	Tet1_P1	protein_coding	chr20	27380664	27380665	+	270
chr20	29852566	29852692	+	3.44791	Psap_P6	protein_coding	chr20	29852568	29852569	+	0
chr20	33429484	33429579	+	1.71836	Dcbld1_P2	protein_coding	chr20	33429250	33429251	+	233
chr20	35404974	35405144	-	3.97965	Man1a1_P2	protein_coding	chr20	35405165	35405166	-	21
chr20	40348145	40348397	+	12.661	Hs3st5_P1	protein_coding	chr20	40348204	40348205	+	0
chr20	44522327	44522384	+	3.14007	Fyn_P2	protein_coding	chr20	44522362	44522363	+	0
chr20	46736612	46736751	+	41.6548	Sesn1_P1	protein_coding	chr20	46736631	46736632	+	0
chr20	46787495	46787798	-	6.40327	Armc2_P1	protein_coding	chr20	46787542	46787543	-	0
chr20	46787495	46787798	-	6.40327	Armc2_P1	protein_coding	chr20	46787761	46787762	-	0
chr20	47907479	47907511	-	0.520546	Sobp_P3	protein_coding	chr20	47907818	47907819	-	307
chr20	47907683	47907804	-	2.26689	Sobp_P1	protein_coding	chr20	47907818	47907819	-	14
chr3	1463079	1463176	+	1.11945	Il1rn_P1	protein_coding	chr3	1463086	1463087	+	0
chr3	5720650	5720689	+	0.604505	Dbh_P1	protein_coding	chr3	5720573	5720574	+	76
chr3	5730796	5730846	+	0.587713	Dbh_P2	protein_coding	chr3	5730603	5730604	+	192
chr3	5787836	5787970	-	2.06539	Sardh_P2	protein_coding	chr3	5787937	5787938	-	0
chr3	5800820	5800938	-	10.9482	Sardh_P1	protein_coding	chr3	5800949	5800950	-	11
chr3	6024485	6024539	-	1.19222	Brd3_P2	protein_coding	chr3	6024635	6024636	-	96
chr3	6024903	6025033	-	50.0899	Brd3_P1	protein_coding	chr3	6024983	6024984	-	0
chr3	6269331	6269435	+	1.34334	Rxra_P2	protein_coding	chr3	6269317	6269318	+	13
chr3	8432414	8432490	+	6.93501	Cercam_P1	protein_coding	chr3	8432445	8432446	+	0
chr3	10584450	10584596	-	8.71494	Ncs1_P2	protein_coding	chr3	10584755	10584756	-	159
chr3	12010831	12010845	+	2.2445	Rpl12_P4	protein_coding	chr3	12011109	12011110	+	264
chr3	12011318	12011396	+	0.570921	Rpl12_P6	protein_coding	chr3	12011109	12011110	+	208
chr3	12011546	12011612	+	1.41051	Rpl12_P5	protein_coding	chr3	12011109	12011110	+	436
chr3	14325958	14326027	+	2.43481	Cntrl_P1	protein_coding	chr3	14325672	14325673	+	285
chr3	14914176	14914265	+	4.27631	Dab2ip_P2	protein_coding	chr3	14914157	14914158	+	18
chr3	14952203	14952304	+	20.3573	Dab2ip_P1	protein_coding	chr3	14952261	14952262	+	0
chr3	14952427	14952429	+	0.71645	Dab2ip_P4	protein_coding	chr3	14952261	14952262	+	165
chr3	21706312	21706417	+	30.9585	Rabgap1_P1	protein_coding	chr3	21706377	21706378	+	0
chr3	29899167	29899279	-	4.9032	Zeb2_P2	protein_coding	chr3	29899245	29899246	-	0
chr3	40615539	40615618	+	3.33037	Galnt13_P1	protein_coding	chr3	40615561	40615562	+	0
chr3	46935090	46935513	-	29.7663	Rbms1_P2	protein_coding	chr3	46935389	46935390	-	0
chr3	50978262	50978287	-	1.8415	Grb14_P3	protein_coding	chr3	50978286	50978287	-	0
chr3	51288449	51288540	-	1.36014	Cobll1_P2	protein_coding	chr3	51288484	51288485	-	0
chr3	52469415	52469519	-	2.82102	Scn1a_P1	protein_coding	chr3	52469458	52469459	-	0
chr3	59687527	59687574	-	6.72791	Sp3_P2	protein_coding	chr3	59687573	59687574	-	0
chr3	60061380	60061520	-	2.92177	Gpr155_P2	protein_coding	chr3	60061448	60061449	-	0
chr3	61812738	61812762	+	0.514948	Mtx2_P2	protein_coding	chr3	61812717	61812718	+	20
chr3	64057535	64057662	-	4.85283	Sestd1_P1	protein_coding	chr3	64057810	64057811	-	148
chr3	79692302	79692331	+	4.00204	Mtch2_P2	protein_coding	chr3	79692243	79692244	+	58
chr3	81300345	81300863	-	54.7972	Mapk8ip1_P1	protein_coding	chr3	81300613	81300614	-	0
chr3	86654543	86654631	+	1.6288	Lrrc4c_P1	protein_coding	chr3	86655093	86655094	+	462
chr3	86655541	86655614	+	1.19781	Lrrc4c_P2	protein_coding	chr3	86655093	86655094	+	447
chr3	95137142	95137237	+	3.61024	Wt1_P1	protein_coding	chr3	95137063	95137064	+	78
chr3	104936360	104936397	+	2.8546	Fmn1_P2	protein_coding	chr3	104936402	104936403	+	5
chr3	110540318	110540437	+	22.6913	AABR07053500.2_P1	protein_coding	chr3	110540716	110540717	+	279
chr3	113315979	113316294	-	13.6909	Ppip5k1_P2	protein_coding	chr3	113316169	113316170	-	0
chr3	113315979	113316294	-	13.6909	Ppip5k1_P2	protein_coding	chr3	113316270	113316271	-	0
chr3	113388041	113388147	+	3.19604	Pdia3_P2	protein_coding	chr3	113388568	113388569	+	421
chr3	113486593	113487145	-	108.934	Frmd5_P1	protein_coding	chr3	113487628	113487629	-	483
chr3	118209528	118209643	+	2.12696	Galk2_P3	protein_coding	chr3	118209420	118209421	+	107
chr3	119498680	119498711	+	2.21092	Ap4e1_P2	protein_coding	chr3	119498795	119498796	+	84
chr3	120049620	120049816	-	1.89747	Kcnip3_P1	protein_coding	chr3	120049814	120049815	-	0
chr3	123783504	123783527	+	1.99263	Mavs_P2	protein_coding	chr3	123783864	123783865	+	337
chr3	128798303	128798341	+	0.503754	Plcb4_P1	protein_coding	chr3	128798325	128798326	+	0
chr3	132938864	132939117	-	15.7787	Tasp1_P1	protein_coding	chr3	132939129	132939130	-	12
chr3	139980330	139980591	+	11.9781	Rin2_P1	protein_coding	chr3	139980104	139980105	+	225
chr3	143006125	143006143	+	2.2557	Gzf1_P2	protein_coding	chr3	143005852	143005853	+	272
chr3	146584716	146584774	+	3.63262	Pygb_P2	protein_coding	chr3	146584747	146584748	+	0
chr3	147260269	147260474	-	25.4955	Psmf1_P1	protein_coding	chr3	147260397	147260398	-	0
chr3	152810361	152810537	+	20.2285	Dlgap4_P1	protein_coding	chr3	152810365	152810366	+	0
chr3	152810639	152810771	+	3.67181	Dlgap4_P2	protein_coding	chr3	152810365	152810366	+	273
chr3	160392918	160393218	+	4.73529	Ywhab_P2	protein_coding	chr3	160392918	160392919	+	0
chr3	163811837	163811861	-	0.912354	Znfx1_P2	protein_coding	chr3	163812217	163812218	-	356
chr4	2562726	2562863	+	2.2445	Ube3c_P2	protein_coding	chr4	2562568	2562569	+	157
chr4	6083648	6083837	+	26.9172	AABR07059168.2_P1	protein_coding	chr4	6083667	6083668	+	0
chr4	6662822	6662893	+	2.07099	Prkag2_P4	protein_coding	chr4	6662768	6662769	+	53
chr4	6752956	6753035	+	5.55808	Prkag2_P2	protein_coding	chr4	6753121	6753122	+	86
chr4	6753216	6753554	+	8.50784	Prkag2_P1	protein_coding	chr4	6753121	6753122	+	94
chr4	7098535	7098941	+	69.9266	Smarcd3_P1	protein_coding	chr4	7098340	7098341	+	194
chr4	7760482	7760566	+	3.51508	Fam126a_P2	protein_coding	chr4	7760499	7760500	+	0
chr4	10441396	10441524	-	2.62512	Gsap_P2	protein_coding	chr4	10441628	10441629	-	104
chr4	27270410	27270675	-	3.69979	Akap9_P2	protein_coding	chr4	27271008	27271009	-	333
chr4	27270883	27270961	-	1.74635	Akap9_P3	protein_coding	chr4	27271008	27271009	-	47
chr4	27417285	27417370	-	4.67372	Lrrd1_P1	protein_coding	chr4	27417324	27417325	-	0
chr4	30461892	30461988	+	2.37884	Asb4_P1	protein_coding	chr4	30461898	30461899	+	0
chr4	34543438	34543484	+	2.6587	Glcci1_P2	protein_coding	chr4	34543761	34543762	+	277
chr4	41680730	41680801	+	1.08587	Foxp2_P2	protein_coding	chr4	41680650	41680651	+	79
chr4	55525998	55526001	-	0.486962	Zfp800_P2	protein_coding	chr4	55526348	55526349	-	347
chr4	56681277	56681337	+	2.51877	Ccdc136_P1	protein_coding	chr4	56681303	56681304	+	0
chr4	60648887	60649000	+	4.42744	Exoc4_P2	protein_coding	chr4	60648920	60648921	+	0
chr4	83037792	83037892	-	2.88259	Jazf1_P2	protein_coding	chr4	83037861	83037862	-	0
chr4	99874365	99874488	+	13.0976	Polr1a_P1	protein_coding	chr4	99874368	99874369	+	0
chr4	100207709	100207816	-	20.9785	Usp39_P1	protein_coding	chr4	100207770	100207771	-	0
chr4	114879455	114879539	+	0.710853	Dctn1_P1	protein_coding	chr4	114879002	114879003	+	452
chr4	119292895	119293061	-	6.97979	Arhgap25_P1	protein_coding	chr4	119293023	119293024	-	0
chr4	123380697	123380985	+	140.883	Iqsec1_P1	protein_coding	chr4	123380736	123380737	+	0
chr4	123401049	123401141	+	7.23726	Iqsec1_P2	protein_coding	chr4	123401086	123401087	+	0
chr4	123598627	123598702	+	7.90334	Grip2_P1	protein_coding	chr4	123598668	123598669	+	0
chr4	129817896	129817960	-	3.15126	Frmd4b_P1	protein_coding	chr4	129817925	129817926	-	0
chr4	131464504	131464635	-	5.70921	Foxp1_P1	protein_coding	chr4	131464537	131464538	-	0
chr4	131531839	131531983	-	3.4703	Foxp1_P2	protein_coding	chr4	131532437	131532438	-	454
chr4	146791774	146791843	-	1.70717	Vgll4_P2	protein_coding	chr4	146791825	146791826	-	0
chr4	147975619	147975710	-	2.446	Tmcc1_P1	protein_coding	chr4	147975656	147975657	-	0
chr4	148023632	148023686	-	1.32655	Tmcc1_P2	protein_coding	chr4	148023657	148023658	-	0
chr4	152233669	152233731	-	1.60082	Erc1_P2	protein_coding	chr4	152233700	152233701	-	0
chr4	153985995	153986051	-	1.28177	Iqsec3_P1	protein_coding	chr4	153985999	153986000	-	0
chr4	155413003	155413025	-	1.06908	LOC100909595_P1	protein_coding	chr4	155413002	155413003	-	0
chr4	157233548	157233647	+	1.66239	Phb2_P2	protein_coding	chr4	157233645	157233646	+	0
chr4	158292988	158293073	+	0.565324	Ano2_P1	protein_coding	chr4	158293033	158293034	+	0
chr4	165622583	165622672	-	1.77993	Ybx3_P5	protein_coding	chr4	165622124	165622125	-	458
chr4	168883164	168883237	-	0.509351	Gprc5d_P1	protein_coding	chr4	168883222	168883223	-	0
chr4	171409566	171409637	+	0.957132	Ptpro_P1	protein_coding	chr4	171409601	171409602	+	0
chr4	174038887	174038959	+	3.64942	Pik3c2g_P1	protein_coding	chr4	174038943	174038944	+	0
chr4	174631444	174631511	+	2.03181	Plekha5_P2	protein_coding	chr4	174631427	174631428	+	16
chr5	2634169	2634310	+	7.7802	Rpl7_P4	protein_coding	chr5	2634169	2634170	+	0
chr5	2634520	2634668	+	9.8232	Rpl7_P3	protein_coding	chr5	2634169	2634170	+	350
chr5	6146986	6147116	-	8.06566	Sulf1_P2	protein_coding	chr5	6147192	6147193	-	76
chr5	8572729	8572767	+	0.430989	Cpa6_P1	protein_coding	chr5	8572748	8572749	+	0
chr5	58860437	58860536	+	2.94976	Rusc2_P1	protein_coding	chr5	58860437	58860438	+	0
chr5	59426832	59426884	+	0.660477	Glipr2_P2	protein_coding	chr5	59426979	59426980	+	95
chr5	59427001	59427096	+	26.7437	Glipr2_P1	protein_coding	chr5	59426979	59426980	+	21
chr5	60636457	60636517	-	1.67918	Fbxo10_P3	protein_coding	chr5	60636515	60636516	-	0
chr5	62016577	62016648	-	4.01884	Hemgn_P1	protein_coding	chr5	62016626	62016627	-	0
chr5	64219042	64219148	-	11.8382	Tex10_P1	protein_coding	chr5	64219095	64219096	-	0
chr5	70659323	70659348	+	0.873173	Tmem38b_P2	protein_coding	chr5	70659179	70659180	+	143
chr5	74056975	74057037	-	0.486962	Epb41l4b_P2	protein_coding	chr5	74057182	74057183	-	145
chr5	74310844	74311135	-	40.888	Ptpn3_P2	protein_coding	chr5	74311122	74311123	-	0
chr5	78487760	78487890	+	3.6774	Rgs3_P4	protein_coding	chr5	78487535	78487536	+	224
chr5	114827936	114828006	+	2.17734	Fggy_P2	protein_coding	chr5	114827958	114827959	+	0
chr5	117026930	117027154	-	83.6399	Tm2d1_P1	protein_coding	chr5	117027104	117027105	-	0
chr5	117082827	117082884	+	2.46839	Patj_P1	protein_coding	chr5	117082859	117082860	+	0
chr5	126587225	126587304	+	3.67181	Ssbp3_P2	protein_coding	chr5	126587181	126587182	+	43
chr5	126674625	126674679	+	2.08218	Cyb5rl_P1	protein_coding	chr5	126674466	126674467	+	158
chr5	127213189	127213242	+	0.666074	Glis1_P1	protein_coding	chr5	127213229	127213230	+	0
chr5	127636999	127637311	-	24.9022	Scp2_P3	protein_coding	chr5	127637130	127637131	-	0
chr5	128557851	128557999	+	246.156	Rab3b_P1	protein_coding	chr5	128557690	128557691	+	160
chr5	128749862	128750019	-	35.2348	Osbpl9_P1	protein_coding	chr5	128749963	128749964	-	0
chr5	133223239	133223273	+	0.71645	Trabd2b_P2	protein_coding	chr5	133222847	133222848	+	391
chr5	134519918	134520016	-	2.38443	Cyp4b1_P3	protein_coding	chr5	134520300	134520301	-	284
chr5	134520233	134520343	-	2.56355	Cyp4b1_P2	protein_coding	chr5	134520300	134520301	-	0
chr5	136021534	136021572	-	1.50007	Rps8_P5	protein_coding	chr5	136021716	136021717	-	144
chr5	136021763	136021933	-	12.4091	Rps8_P4	protein_coding	chr5	136021716	136021717	-	46
chr5	136147156	136147192	-	23.6764	AABR07049755.1_P1	protein_coding	chr5	136147173	136147174	-	0
chr5	136408477	136408508	+	1.79112	Eri3_P2	protein_coding	chr5	136408497	136408498	+	0
chr5	140987877	140987939	+	0.996313	Pabpc4_P3	protein_coding	chr5	140987448	140987449	+	428
chr5	141101004	141101531	-	33.3317	Macf1_P1	protein_coding	chr5	141101728	141101729	-	197
chr5	141250708	141250981	-	7.1645	Macf1_P4	protein_coding	chr5	141251041	141251042	-	60
chr5	146907150	146907448	+	50.6385	Phc2_P1	protein_coding	chr5	146907194	146907195	+	0
chr5	147484874	147484942	+	2.52437	Sync_P2	protein_coding	chr5	147484735	147484736	+	138
chr5	147798099	147798142	-	1.13065	AABR07049994.1_P3	protein_coding	chr5	147798139	147798140	-	0
chr5	150583810	150583835	-	2.17174	Phactr4_P2	protein_coding	chr5	150583812	150583813	-	0
chr5	150694958	150695037	-	0.884368	Sesn2_P2	protein_coding	chr5	150695232	150695233	-	195
chr5	152108590	152108619	-	0.945938	Rps6ka1_P2	protein_coding	chr5	152108583	152108584	-	6
chr5	152220554	152220894	-	5.68122	Dhdds_P4	protein_coding	chr5	152221296	152221297	-	402
chr5	152221641	152221811	-	4.33228	Dhdds_P5	protein_coding	chr5	152221296	152221297	-	344
chr5	152378409	152378479	-	6.68313	Cep85_P2	protein_coding	chr5	152378479	152378480	-	0
chr5	152976843	152976852	-	0.498157	Ldlrap1_P2	protein_coding	chr5	152977116	152977117	-	264
chr5	154140763	154141007	+	11.2841	Myom3_P1	protein_coding	chr5	154140793	154140794	+	0
chr5	156115791	156115949	-	8.04327	Alpl_P1	protein_coding	chr5	156116031	156116032	-	82
chr5	156263818	156264170	+	13.3887	Ece1_P2	protein_coding	chr5	156263839	156263840	+	0
chr5	156416257	156416290	+	1.27618	Eif4g3_P1	protein_coding	chr5	156416092	156416093	+	164
chr5	160154662	160154738	-	0.811603	Fblim1_P5	protein_coding	chr5	160155000	160155001	-	262
chr5	164956866	164956921	-	1.15863	Fbxo6_P3	protein_coding	chr5	164957306	164957307	-	385
chr5	164957594	164957664	-	0.811603	Fbxo6_P4	protein_coding	chr5	164957306	164957307	-	287
chr5	165470281	165470314	+	2.87699	AABR07050449.1_P2	protein_coding	chr5	165470300	165470301	+	0
chr5	165479567	165479655	+	2.52996	AABR07050449.1_P3	protein_coding	chr5	165480150	165480151	+	495
chr5	165480048	165480127	+	4.55058	AABR07050449.1_P1	protein_coding	chr5	165480150	165480151	+	23
chr5	165955696	165955773	-	3.75576	Kif1b_P3	protein_coding	chr5	165955738	165955739	-	0
chr5	165982247	165982366	-	33.2366	Kif1b_P2	protein_coding	chr5	165982326	165982327	-	0
chr5	167242307	167242371	-	0.660477	Ca6_P1	protein_coding	chr5	167242346	167242347	-	0
chr5	167536460	167536579	+	3.57105	Rere_P3	protein_coding	chr5	167536271	167536272	+	188
chr5	168191903	168192087	-	25.8594	Camta1_P2	protein_coding	chr5	168192041	168192042	-	0
chr5	169269301	169269414	+	9.12914	Plekhg5_P1	protein_coding	chr5	169269317	169269318	+	0
chr5	169378746	169378883	+	1.47208	Acot7_P4	protein_coding	chr5	169378788	169378789	+	0
chr5	169385923	169386061	+	6.7559	Acot7_P3	protein_coding	chr5	169385681	169385682	+	241
chr6	10971993	10972203	+	8.15521	Ttc7a_P1	protein_coding	chr6	10971966	10971967	+	26
chr6	23303652	23304034	-	52.4464	Clip4_P1	protein_coding	chr6	23303789	23303790	-	0
chr6	25421414	25421477	-	4.17556	Plb1_P1	protein_coding	chr6	25421459	25421460	-	0
chr6	26217078	26217238	-	249.806	Slc4a1ap_P1	protein_coding	chr6	26217220	26217221	-	0
chr6	53976633	53976818	-	8.77651	Hdac9_P1	protein_coding	chr6	53976752	53976753	-	0
chr6	55476202	55476210	+	0.83959	Agr2_P1	protein_coding	chr6	55476215	55476216	+	5
chr6	55918679	55918729	+	2.77065	Crppa_P2	protein_coding	chr6	55918625	55918626	+	53
chr6	65306447	65306669	-	11.5472	Stxbp6_P2	protein_coding	chr6	65307072	65307073	-	403
chr6	73645507	73645823	+	9.95753	Akap6_P2	protein_coding	chr6	73645559	73645560	+	0
chr6	73708085	73708439	+	67.5086	Akap6_P1	protein_coding	chr6	73708152	73708153	+	0
chr6	91884267	91884360	-	9.83999	Sos2_P1	protein_coding	chr6	91884337	91884338	-	0
chr6	93437407	93437447	+	0.542935	Psma3_P3	protein_coding	chr6	93437382	93437383	+	24
chr6	94473710	94473774	+	1.44969	Ppm1a_P2	protein_coding	chr6	94473640	94473641	+	69
chr6	102168141	102168199	-	0.733242	Tmem229b_P2	protein_coding	chr6	102168193	102168194	-	0
chr6	104071338	104071439	+	5.44614	Galnt16_P1	protein_coding	chr6	104071352	104071353	+	0
chr6	106905574	106905611	-	0.77802	Dpf3_P2	protein_coding	chr6	106905571	106905572	-	2
chr6	109943295	109943588	+	41.0671	Ift43_P1	protein_coding	chr6	109943504	109943505	+	0
chr6	119522564	119522630	+	2.11577	Flrt2_P2	protein_coding	chr6	119522744	119522745	+	114
chr6	123408623	123408824	-	34.9829	Foxn3_P1	protein_coding	chr6	123408785	123408786	-	0
chr6	123475035	123475125	-	1.79672	Foxn3_P4	protein_coding	chr6	123475179	123475180	-	54
chr6	124125499	124125567	+	0.973924	Psmc1_P6	protein_coding	chr6	124125272	124125273	+	226
chr6	131902499	131902693	-	1.27618	Bcl11b_P1	protein_coding	chr6	131902696	131902697	-	3
chr6	132125211	132125352	-	6.84545	AABR07065498.1_P2	protein_coding	chr6	132125309	132125310	-	0
chr6	132539495	132539571	+	2.77065	Evl_P1	protein_coding	chr6	132539457	132539458	+	37
chr6	135870818	135870857	+	0.833992	Exoc3l4_P2	protein_coding	chr6	135870851	135870852	+	0
chr6	137965164	137965332	+	207.468	Crip1_P1	protein_coding	chr6	137965267	137965268	+	0
chr6	145808222	145808277	-	6.63276	Dnah11_P1	protein_coding	chr6	145808223	145808224	-	0
chr7	2492577	2492594	+	1.71276	Ptges3_P2	protein_coding	chr7	2492577	2492578	+	0
chr7	2505698	2505873	+	53.7393	Atp5f1b_P4	protein_coding	chr7	2505544	2505545	+	153
chr7	2506142	2506262	+	22.2715	Atp5f1b_P8	protein_coding	chr7	2506333	2506334	+	71
chr7	2506488	2506671	+	41.75	Atp5f1b_P6	protein_coding	chr7	2506333	2506334	+	154
chr7	10964080	10964231	+	2.0486	Tle6_P1	protein_coding	chr7	10964197	10964198	+	0
chr7	11402978	11404377	-	32.3466	Eef2_P2	protein_coding	chr7	11404517	11404518	-	140
chr7	11404588	11404791	-	6.7559	Eef2_P4	protein_coding	chr7	11404517	11404518	-	70
chr7	12562833	12562838	-	0.414198	Arhgap45_P2	protein_coding	chr7	12563075	12563076	-	237
chr7	12616456	12616507	+	0.626894	Med16_P7	protein_coding	chr7	12616441	12616442	+	14
chr7	14385052	14385140	-	5.78757	Wiz_P2	protein_coding	chr7	14385200	14385201	-	60
chr7	24047791	24047879	-	2.8546	Btbd11_P1	protein_coding	chr7	24047937	24047938	-	58
chr7	31817784	31817950	-	19.9766	Slc25a3_P3	protein_coding	chr7	31818265	31818266	-	315
chr7	31818436	31818614	-	17.1724	Slc25a3_P5	protein_coding	chr7	31818265	31818266	-	170
chr7	34968555	34968592	+	2.22771	Fgd6_P2	protein_coding	chr7	34968578	34968579	+	0
chr7	59304059	59304212	+	23.0831	Ptprr_P1	protein_coding	chr7	59304010	59304011	+	48
chr7	83666198	83666304	-	0.912354	Sybu_P1	protein_coding	chr7	83666328	83666329	-	24
chr7	83666479	83666508	-	0.397406	Sybu_P2	protein_coding	chr7	83666328	83666329	-	150
chr7	99765878	99765933	+	2.56355	Nsmce2_P2	protein_coding	chr7	99765560	99765561	+	317
chr7	109101294	109101479	-	4.57856	Zfat_P1	protein_coding	chr7	109101410	109101411	-	0
chr7	117305843	117306116	+	9.52654	Grina_P2	protein_coding	chr7	117306193	117306194	+	77
chr7	117306613	117306641	+	0.486962	Grina_P3	protein_coding	chr7	117306193	117306194	+	419
chr7	118228240	118228397	-	45.2427	Rbfox2_P1	protein_coding	chr7	118228347	118228348	-	0
chr7	120318850	120318876	+	1.4329	AC096473.3_P14	protein_coding	chr7	120318846	120318847	+	3
chr7	120630202	120630276	-	2.57474	Tmem184b_P3	protein_coding	chr7	120630417	120630418	-	141
chr7	120634437	120634467	-	0.604505	Tmem184b_P4	protein_coding	chr7	120634519	120634520	-	52
chr7	122018474	122018562	+	21.5719	Tnrc6b_P2	protein_coding	chr7	122018513	122018514	+	0
chr7	123755211	123755333	-	15.0287	Tcf20_P1	protein_coding	chr7	123755300	123755301	-	0
chr7	124039548	124039592	-	7.64027	Cyb5r3_P2	protein_coding	chr7	124039964	124039965	-	372
chr7	124851123	124851258	-	2.12696	Efcab6_P1	protein_coding	chr7	124851227	124851228	-	0
chr7	125210773	125211016	+	2.08218	Parvb_P5	protein_coding	chr7	125210717	125210718	+	55
chr7	125225670	125225730	+	3.43112	Parvb_P3	protein_coding	chr7	125225684	125225685	+	0
chr7	125588381	125588408	+	2.13816	Prr5_P1	protein_coding	chr7	125588407	125588408	+	0
chr7	130344543	130344633	-	25.7194	Tymp_P1	protein_coding	chr7	130344923	130344924	-	290
chr7	130344825	130344898	-	1.83031	Tymp_P2	protein_coding	chr7	130344923	130344924	-	25
chr7	133115742	133115824	+	0.666074	AC096792.1_P1	protein_coding	chr7	133115783	133115784	+	0
chr7	137185418	137185472	+	2.13816	Ano6_P2	protein_coding	chr7	137185200	137185201	+	217
chr7	138023463	138023548	-	4.6961	Slc38a1_P3	protein_coding	chr7	138023509	138023510	-	0
chr7	139210933	139210970	-	0.514948	Endou_P1	protein_coding	chr7	139210947	139210948	-	0
chr7	139371246	139371273	-	0.442184	Vdr_P2	protein_coding	chr7	139371603	139371604	-	330
chr7	139371728	139371800	-	0.906757	Vdr_P1	protein_coding	chr7	139371603	139371604	-	124
chr7	140265934	140265990	+	1.08587	Tex49_P1	protein_coding	chr7	140265843	140265844	+	90
chr7	141469930	141469935	-	1.04109	Lima1_P3	protein_coding	chr7	141470376	141470377	-	441
chr7	141470176	141470393	-	14.4969	Lima1_P1	protein_coding	chr7	141470376	141470377	-	0
chr7	142061545	142061769	-	15.4149	Slc11a2_P1	protein_coding	chr7	142061684	142061685	-	0
chr7	143950110	143950420	-	7.65706	Aaas_P1	protein_coding	chr7	143950393	143950394	-	0
chr7	144058217	144058375	+	8.1944	Amhr2_P2	protein_coding	chr7	144058211	144058212	+	5
chr7	144058627	144058784	+	11.3121	Amhr2_P1	protein_coding	chr7	144058211	144058212	+	415
chr7	144949414	144949491	-	9.42579	Zfp385a_P1	protein_coding	chr7	144949457	144949458	-	0
chr7	145129535	145129580	+	0.582115	Pde1b_P1	protein_coding	chr7	145129585	145129586	+	5
chr8	12856363	12856428	+	1.10266	Sesn3_P2	protein_coding	chr8	12856280	12856281	+	82
chr8	17520349	17520434	-	4.46662	Naalad2_P1	protein_coding	chr8	17520395	17520396	-	0
chr8	22204271	22204312	+	1.19781	Pde4a_P2	protein_coding	chr8	22204302	22204303	+	0
chr8	22206651	22207026	+	38.3469	Pde4a_P1	protein_coding	chr8	22206729	22206730	+	0
chr8	25900675	25900926	-	7.44436	Tbx20_P3	protein_coding	chr8	25900381	25900382	-	293
chr8	28086632	28086718	+	1.15304	Ncapd3_P2	protein_coding	chr8	28086637	28086638	+	0
chr8	32240864	32240911	-	1.89188	St14_P1	protein_coding	chr8	32240870	32240871	-	0
chr8	44189190	44189324	-	1.39932	Gramd1b_P2	protein_coding	chr8	44189279	44189280	-	0
chr8	44991338	44991341	+	0.694061	Hspa8_P5	protein_coding	chr8	44991644	44991645	+	303
chr8	44991482	44991589	+	3.8845	Hspa8_P4	protein_coding	chr8	44991644	44991645	+	55
chr8	44991814	44991832	+	0.671672	Hspa8_P6	protein_coding	chr8	44991644	44991645	+	169
chr8	44992223	44992573	+	4.96477	Hspa8_P2	protein_coding	chr8	44992057	44992058	+	165
chr8	48809278	48809314	+	0.750033	Bcl9l_P3	protein_coding	chr8	48809314	48809315	+	0
chr8	49031506	49031720	-	46.4853	Phldb1_P1	protein_coding	chr8	49031704	49031705	-	0
chr8	55125609	55125649	-	0.65488	Dixdc1_P1	protein_coding	chr8	55125601	55125602	-	7
chr8	59538171	59538290	+	4.95918	Psma4_P2	protein_coding	chr8	59538251	59538252	+	0
chr8	59538714	59538832	+	1.90867	Psma4_P3	protein_coding	chr8	59538251	59538252	+	462
chr8	62800840	62800953	+	7.47235	Cyp11a1_P1	protein_coding	chr8	62800893	62800894	+	0
chr8	68589104	68589196	-	0.889965	Smad3_P3	protein_coding	chr8	68589324	68589325	-	128
chr8	69123102	69123146	+	0.783617	Rpl4_P8	protein_coding	chr8	69123322	69123323	+	176
chr8	69123861	69123992	+	2.09338	Rpl4_P6	protein_coding	chr8	69123699	69123700	+	161
chr8	69124384	69124503	+	7.11972	Rpl4_P2	protein_coding	chr8	69124162	69124163	+	221
chr8	69125160	69125236	+	3.38634	Rpl4_P5	protein_coding	chr8	69125342	69125343	+	106
chr8	69125564	69125592	+	5.84354	Rpl4_P4	protein_coding	chr8	69125342	69125343	+	221
chr8	70204434	70204483	-	0.710853	Rab11a_P3	protein_coding	chr8	70204509	70204510	-	26
chr8	71509549	71509651	-	15.6667	Trip4_P1	protein_coding	chr8	71509581	71509582	-	0
chr8	76537569	76537660	-	3.2688	Fam81a_P1	protein_coding	chr8	76537599	76537600	-	0
chr8	82227425	82227537	+	2.11017	Myo5c_P1	protein_coding	chr8	82227448	82227449	+	0
chr8	107501351	107501417	+	3.05051	Cep70_P1	protein_coding	chr8	107501384	107501385	+	0
chr8	111687271	111687493	-	51.0974	Tf_P1	protein_coding	chr8	111687448	111687449	-	0
chr8	111937062	111937148	-	3.24082	Bfsp2_P1	protein_coding	chr8	111937286	111937287	-	138
chr8	117601822	117601940	+	5.61406	Nckipsd_P1	protein_coding	chr8	117601859	117601860	+	0
chr8	118924095	118924389	-	5.43494	Nbeal2_P1	protein_coding	chr8	118924363	118924364	-	0
chr8	119009038	119009154	-	6.55999	Pth1r_P1	protein_coding	chr8	119009105	119009106	-	0
chr8	122058198	122058348	+	16.0306	Clasp2_P1	protein_coding	chr8	122057779	122057780	+	418
chr8	122290353	122290401	-	1.37133	Fbxl2_P1	protein_coding	chr8	122290377	122290378	-	0
chr8	127275318	127275440	+	2.36764	Itga9_P2	protein_coding	chr8	127275354	127275355	+	0
chr8	128807472	128807590	+	4.06921	Rpsa_P5	protein_coding	chr8	128807665	128807666	+	75
chr8	128808545	128808768	+	7.9761	Rpsa_P4	protein_coding	chr8	128808840	128808841	+	72
chr8	128809205	128809522	+	23.7436	Rpsa_P3	protein_coding	chr8	128808840	128808841	+	364
chr8	132902125	132902285	-	8.64218	Fyco1_P2	protein_coding	chr8	132902271	132902272	-	0
chr9	10847775	10847866	+	3.91249	Dpp9_P2	protein_coding	chr9	10847699	10847700	+	75
chr9	15167534	15167594	+	0.660477	Mdfi_P1	protein_coding	chr9	15167577	15167578	+	0
chr9	16406586	16406643	+	3.99645	Bicral_P1	protein_coding	chr9	16406809	16406810	+	166
chr9	16434032	16434083	+	2.64191	Bicral_P2	protein_coding	chr9	16434219	16434220	+	136
chr9	16434194	16434256	+	1.6456	Bicral_P3	protein_coding	chr9	16434219	16434220	+	0
chr9	17787952	17788058	+	25.7586	Slc29a1_P1	protein_coding	chr9	17787954	17787955	+	0
chr9	20167726	20167964	-	56.801	Adgrf5_P1	protein_coding	chr9	20167970	20167971	-	6
chr9	38089900	38090611	-	66.6298	Dst_P1	protein_coding	chr9	38090771	38090772	-	160
chr9	38674240	38674308	+	0.705255	Prim2_P2	protein_coding	chr9	38674081	38674082	+	158
chr9	43270737	43270827	-	2.39563	Actr1b_P3	protein_coding	chr9	43271042	43271043	-	215
chr9	44761047	44761049	-	1.75194	Rev1_P2	protein_coding	chr9	44761170	44761171	-	121
chr9	44880458	44880556	-	0.794812	Aff3_P2	protein_coding	chr9	44880649	44880650	-	93
chr9	54334090	54334132	-	0.917951	Stat1_P3	protein_coding	chr9	54334239	54334240	-	107
chr9	60164588	60164719	-	1.237	Dnah7_P1	protein_coding	chr9	60164641	60164642	-	0
chr9	60625878	60626048	-	7.76341	Hecw2_P1	protein_coding	chr9	60626002	60626003	-	0
chr9	65554037	65554070	+	0.77802	Cflar_P3	protein_coding	chr9	65553783	65553784	+	253
chr9	69954901	69955000	+	4.14198	Eef1b2_P2	protein_coding	chr9	69955161	69955162	+	161
chr9	69955315	69955369	+	3.40873	Eef1b2_P3	protein_coding	chr9	69955500	69955501	+	131
chr9	75032769	75032828	-	1.48887	Erbb4_P1	protein_coding	chr9	75032813	75032814	-	0
chr9	81293179	81293452	-	56.9634	Tns1_P3	protein_coding	chr9	81293930	81293931	-	478
chr9	81294416	81294542	-	8.84928	Tns1_P9	protein_coding	chr9	81294507	81294508	-	0
chr9	81313296	81313447	-	87.5916	Tns1_P2	protein_coding	chr9	81313563	81313564	-	116
chr9	81344829	81345413	-	284.682	Tns1_P1	protein_coding	chr9	81344952	81344953	-	0
chr9	81529444	81529671	+	3.59904	Arpc2_P2	protein_coding	chr9	81529480	81529481	+	0
chr9	81564143	81564163	-	2.35645	Aamp_P2	protein_coding	chr9	81563946	81563947	-	196
chr9	81675835	81675960	+	1.65119	Ctdsp1_P3	protein_coding	chr9	81675364	81675365	+	470
chr9	92074254	92074294	-	1.4329	Dner_P1	protein_coding	chr9	92074282	92074283	-	0
chr9	92698939	92699026	+	0.973924	Sp100_P1	protein_coding	chr9	92698936	92698937	+	2
chr9	93369617	93369645	-	1.37133	Ncl_P4	protein_coding	chr9	93369914	93369915	-	269
chr9	93612592	93612644	+	7.43876	Cops7b_P1	protein_coding	chr9	93612568	93612569	+	23
chr9	95011372	95011435	+	1.4329	Dgkd_P3	protein_coding	chr9	95011212	95011213	+	159
chr9	95032924	95033042	+	7.25405	Dgkd_P2	protein_coding	chr9	95032951	95032952	+	0
chr9	96721577	96721666	+	1.81911	Agap1_P2	protein_coding	chr9	96721491	96721492	+	85
chr9	96849206	96849285	+	2.47959	Agap1_P1	protein_coding	chr9	96849245	96849246	+	0
chr9	97130420	97130548	-	5.45174	Asb18_P2	protein_coding	chr9	97130499	97130500	-	0
chr9	100024529	100024564	+	1.30976	Gpc1_P8	protein_coding	chr9	100024205	100024206	+	323
chr9	100870993	100871089	-	17.2228	Thap4_P1	protein_coding	chr9	100871278	100871279	-	189
chr9	111103611	111103636	+	1.27618	Pam_P5	protein_coding	chr9	111103592	111103593	+	18
chr9	119188281	119188350	-	1.57843	Tgif1_P2	protein_coding	chr9	119188357	119188358	-	7
chrX	16769485	16769611	-	13.7805	Shroom4_P1	protein_coding	chrX	16769576	16769577	-	0
chrX	22212131	22212150	+	0.750033	Iqsec2_P4	protein_coding	chrX	22212131	22212132	+	0
chrX	22212624	22212643	+	0.475767	Iqsec2_P6	protein_coding	chrX	22212131	22212132	+	492
chrX	23173004	23173008	-	3.16245	Alas2_P1	protein_coding	chrX	23173145	23173146	-	137
chrX	29468012	29468180	+	0.750033	Egfl6_P1	protein_coding	chrX	29468068	29468069	+	0
chrX	33516052	33516386	-	12.3028	Ctps2_P1	protein_coding	chrX	33516350	33516351	-	0
chrX	37515634	37515739	+	9.26347	Rps6ka3_P2	protein_coding	chrX	37515683	37515684	+	0
chrX	37821854	37822356	-	374.966	Sh3kbp1_P1	protein_coding	chrX	37822275	37822276	-	0
chrX	38449865	38449992	-	1.66798	Map7d2_P1	protein_coding	chrX	38449934	38449935	-	0
chrX	65291020	65291085	+	0.65488	Msn_P5	protein_coding	chrX	65291021	65291022	+	0
chrX	65291487	65291547	+	5.63645	Msn_P2	protein_coding	chrX	65291021	65291022	+	465
chrX	70603269	70603389	+	3.20164	Dlg3_P1	protein_coding	chrX	70603333	70603334	+	0
chrX	76979074	76979168	-	8.3791	Atrx_P1	protein_coding	chrX	76979114	76979115	-	0
chrX	77212390	77212485	+	5.08232	AABR07039446.2_P1	protein_coding	chrX	77212438	77212439	+	0
chrX	107403016	107403117	-	83.6119	Morf4l2_P1	protein_coding	chrX	107403081	107403082	-	0
chrX	119064835	119065172	+	7.79699	Pls3_P2	protein_coding	chrX	119065087	119065088	+	0
chrX	121651141	121651224	-	1.79672	Klhl13_P1	protein_coding	chrX	121651464	121651465	-	240
chrX	123406119	123406175	+	1.2314	Slc25a5_P3	protein_coding	chrX	123406484	123406485	+	309
chrX	124860519	124860705	-	5.44614	Cul4b_P1	protein_coding	chrX	124860681	124860682	-	0
chrX	124860982	124861082	-	3.2744	Cul4b_P2	protein_coding	chrX	124860681	124860682	-	300
chrX	128494885	128495061	+	17.6594	Stag2_P1	protein_coding	chrX	128494673	128494674	+	211
chrX	134943022	134943088	+	1.2258	Xpnpep2_P1	protein_coding	chrX	134942997	134942998	+	24
chrX	136797947	136798054	-	1.44409	Igsf1_P4	protein_coding	chrX	136798348	136798349	-	294
chrX	136798298	136798366	-	3.12327	Igsf1_P2	protein_coding	chrX	136798348	136798349	-	0
chrX	156438569	156438712	-	4.75208	Rpl10_P4	protein_coding	chrX	156438898	156438899	-	186
chrX	156439084	156439219	-	8.93883	Rpl10_P2	protein_coding	chrX	156438898	156438899	-	185
chrX	158988839	158988950	+	12.2804	Slc9a6_P1	protein_coding	chrX	158988869	158988870	+	0
chrX	158988839	158988950	+	12.2804	Slc9a6_P1	protein_coding	chrX	158988927	158988928	+	0
chrX	159829217	159829685	-	20.9953	Arhgef6_P1	protein_coding	chrX	159830158	159830159	-	473
chrX	159829961	159830056	-	1.6456	Arhgef6_P3	protein_coding	chrX	159830158	159830159	-	102
chrX	159839477	159839523	-	0.906757	Arhgef6_P4	protein_coding	chrX	159839486	159839487	-	0
