# Supplementary material for: Cap analysis of gene expression reveals alternative promoter usage in a rat model of hypertension
Source: Life Sci Alliance. 2022 Jan 7;5(4):e202101234. doi: 10.26508/lsa.202101234 (PMC8742872; doi:10.26508/lsa.202101234)
Supplement: Supplementary file 3 [file LSA-2021-01234_TableS2.xlsx]

## Sheet: intergenic_TC_with_stringtie_su
Table S2: List of intergenic CAGE defined tag clusters with supported by de-novo transcript TSS
Intergenic CAGE tag cluster						Closest Gene	Distance	Stringtie TSS
Chr	Start	End	Strand	TPM	Promoter ID			Chr	Start	End	Strand	Distance from TC
chr1	1173468	1173541	+	2.6531	chr1:1173468:1173541:+_P1	Ulbp1	7389	chr1	1173477	1173478	+	0
chr1	1671251	1671355	+	14.8328	chr1:1671251:1671355:+_P1	Lrp11	31339	chr1	1671235	1671236	+	15
chr1	2083529	2083558	-	1.18102	chr1:2083529:2083558:-_P1	Tab2	9633	chr1	2083280	2083281	-	248
chr1	7633860	7634011	-	1.24819	chr1:7633860:7634011:-_P1	Pex3	92388	chr1	7634079	7634080	-	68
chr1	11906116	11906199	-	1.237	chr1:11906116:11906199:-_P1	AABR07071848.1	1046705	chr1	11906592	11906593	-	393
chr1	11914838	11915223	-	104.266	chr1:11914838:11915223:-_P1	AABR07071848.1	1037681	chr1	11915622	11915623	-	399
chr1	13472656	13472741	+	2.40682	chr1:13472656:13472741:+_P1	Nhsl1	122552	chr1	13472549	13472550	+	106
chr1	13569305	13569379	+	8.44627	chr1:13569305:13569379:+_P1	Nhsl1	25914	chr1	13569363	13569364	+	0
chr1	14416205	14416368	-	12.9409	chr1:14416205:14416368:-_P1	Tnfaip3	3398	chr1	14416346	14416347	-	0
chr1	16472410	16472643	+	9.0116	chr1:16472410:16472643:+_P1	Ahi1	5482	chr1	16472199	16472200	+	210
chr1	19998776	19998836	+	1.89188	chr1:19998776:19998836:+_P1	L3mbtl3	23955	chr1	19998806	19998807	+	0
chr1	19999752	19999794	+	1.00751	chr1:19999752:19999794:+_P1	L3mbtl3	22997	chr1	19999752	19999753	+	0
chr1	20972287	20972423	-	3.75576	chr1:20972287:20972423:-_P1	Epb41l2	9761	chr1	20972395	20972396	-	0
chr1	30856927	30857021	+	50.4258	chr1:30856927:30857021:+_P1	Rnf146	6194	chr1	30856879	30856880	+	47
chr1	32167740	32167976	-	119.67	chr1:32167740:32167976:-_P1	Slc12a7	26704	chr1	32167956	32167957	-	0
chr1	37888850	37888912	-	14.4465	chr1:37888850:37888912:-_P1	AABR07001099.1	2175	chr1	37889110	37889111	-	198
chr1	37965980	37966050	-	5.51331	chr1:37965980:37966050:-_P1	LOC102549842	8568	chr1	37966006	37966007	-	0
chr1	38009375	38009457	-	1.25379	chr1:38009375:38009457:-_P1	AABR07001100.1	19368	chr1	38009438	38009439	-	0
chr1	38543326	38543416	-	4.87522	chr1:38543326:38543416:-_P1	LOC102551340	4339	chr1	38543396	38543397	-	0
chr1	38597599	38597660	-	0.811603	chr1:38597599:38597660:-_P1	LOC501406	11036	chr1	38597659	38597660	-	0
chr1	40286866	40287157	+	17.1332	chr1:40286866:40287157:+_P1	Plekhg1	102479	chr1	40286911	40286912	+	0
chr1	40933493	40933495	-	1.50007	chr1:40933493:40933495:-_P1	Zbtb2	11985	chr1	40933494	40933495	-	0
chr1	40982542	40982680	-	26.2624	chr1:40982542:40982680:-_P1	Rmnd1	9716	chr1	40982605	40982606	-	0
chr1	48905108	48905161	-	1.67918	chr1:48905108:48905161:-_P1	AC135026.1	13978	chr1	48905146	48905147	-	0
chr1	50069970	50070105	-	17.0437	chr1:50069970:50070105:-_P1	AABR07001519.1	225423	chr1	50070030	50070031	-	0
chr1	53841169	53841376	-	12.37	chr1:53841169:53841376:-_P1	Afdn	38511	chr1	53841210	53841211	-	0
chr1	57690832	57690956	+	15.3869	chr1:57690832:57690956:+_P1	Chd1	1878	chr1	57690839	57690840	+	0
chr1	59384277	59384546	-	46.1998	chr1:59384277:59384546:-_P1	Lnpep	36805	chr1	59384545	59384546	-	0
chr1	59384986	59385073	-	20.6819	chr1:59384986:59385073:-_P1	Lnpep	37514	chr1	59384545	59384546	-	440
chr1	59701054	59701316	+	4.17556	chr1:59701054:59701316:+_P1	Spaca6	3680	chr1	59701187	59701188	+	0
chr1	61258709	61258775	+	4.53938	chr1:61258709:61258775:+_P1	LOC102552527	9471	chr1	61258634	61258635	+	74
chr1	62381386	62381484	-	7.27085	chr1:62381386:62381484:-_P1	AABR07001926.3	64936	chr1	62381467	62381468	-	0
chr1	64434945	64434976	-	0.621296	chr1:64434945:64434976:-_P1	Prkcg	1309	chr1	64434976	64434977	-	0
chr1	64448040	64448345	-	6.46484	chr1:64448040:64448345:-_P1	Myadm	1222	chr1	64448322	64448323	-	0
chr1	65687473	65687537	-	8.08805	chr1:65687473:65687537:-_P1	Zscan22	6033	chr1	65687502	65687503	-	0
chr1	65705324	65705387	-	3.94607	chr1:65705324:65705387:-_P1	Zfp128	3457	chr1	65705359	65705360	-	0
chr1	66256844	66256925	-	9.92395	chr1:66256844:66256925:-_P1	Zfp606	1855	chr1	66256906	66256907	-	0
chr1	71178945	71179033	-	1.34894	chr1:71178945:71179033:-_P1	Zfp28	5729	chr1	71178996	71178997	-	0
chr1	71196832	71196895	-	1.98703	chr1:71196832:71196895:-_P1	Zfp78	6409	chr1	71196882	71196883	-	0
chr1	72374541	72374791	-	15.2861	chr1:72374541:72374791:-_P1	Zfp524	2641	chr1	72375215	72375216	-	424
chr1	72379508	72379896	-	11.4128	chr1:72379508:72379896:-_P1	Zfp524	2074	chr1	72379551	72379552	-	0
chr1	72472858	72472933	-	8.68695	chr1:72472858:72472933:-_P1	Zfp628	4120	chr1	72472897	72472898	-	0
chr1	75356002	75356097	-	4.11959	chr1:75356002:75356097:-_P1	Zswim9	1182	chr1	75356114	75356115	-	17
chr1	78225571	78225652	-	0.666074	chr1:78225571:78225652:-_P1	Ccdc9	1252	chr1	78225913	78225914	-	261
chr1	78226306	78226402	-	22.0644	chr1:78226306:78226402:-_P1	Ccdc9	1987	chr1	78226517	78226518	-	115
chr1	78740747	78740776	-	20.7211	chr1:78740747:78740776:-_P1	Fkrp	1640	chr1	78740759	78740760	-	0
chr1	79999644	79999848	+	4.61774	chr1:79999644:79999848:+_P1	Six5	315	chr1	80000164	80000165	+	316
chr1	80271544	80271617	+	1.09706	chr1:80271544:80271617:+_P1	Ppp1r13l	8087	chr1	80271584	80271585	+	0
chr1	81046948	81047020	-	2.94976	chr1:81046948:81047020:-_P1	Zfp111	3608	chr1	81047002	81047003	-	0
chr1	81769210	81769284	+	7.00778	chr1:81769210:81769284:+_P1	AABR07002700.1	5596	chr1	81769210	81769211	+	0
chr1	84008060	84008168	+	3.8845	chr1:84008060:84008168:+_P1	RGD1560854	1098	chr1	84008290	84008291	+	122
chr1	84361454	84361725	-	9.2075	chr1:84361454:84361725:-_P1	Pld3	7729	chr1	84361577	84361578	-	0
chr1	84400863	84401112	+	81.9216	chr1:84400863:84401112:+_P1	Akt2	10612	chr1	84400785	84400786	+	77
chr1	84529074	84529079	+	2.23331	chr1:84529074:84529079:+_P1	LOC100909824	1588	chr1	84529078	84529079	+	0
chr1	84636540	84636600	+	2.20532	chr1:84636540:84636600:+_P1	AABR07071891.3	2512	chr1	84636544	84636545	+	0
chr1	84676590	84676679	+	1.57283	chr1:84676590:84676679:+_P1	AABR07002774.3	2933	chr1	84676455	84676456	+	134
chr1	84899211	84899288	-	3.93488	chr1:84899211:84899288:-_P1	Zfp780b-ps1	4406	chr1	84899267	84899268	-	0
chr1	87647014	87647140	+	10.8867	chr1:87647014:87647140:+_P1	Zfp84	3065	chr1	87647036	87647037	+	0
chr1	89382962	89383131	-	7.14211	chr1:89382962:89383131:-_P1	Usf2	499	chr1	89382462	89382463	-	499
chr1	89474416	89474490	-	1.00751	chr1:89474416:89474490:-_P1	Fxyd5	164	chr1	89474251	89474252	-	164
chr1	94574213	94574321	+	31.4958	chr1:94574213:94574321:+_P1	LOC690000	4757	chr1	94574318	94574319	+	0
chr1	94616469	94616579	-	75.4343	chr1:94616469:94616579:-_P1	Plekhf1	5615	chr1	94616556	94616557	-	0
chr1	94788435	94788496	+	0.884368	chr1:94788435:94788496:+_P1	AC120712.4	4697	chr1	94788452	94788453	+	0
chr1	98614919	98615192	+	16.9877	chr1:98614919:98615192:+_P1	Zfp17	12178	chr1	98614937	98614938	+	0
chr1	100220760	100220850	+	4.85843	chr1:100220760:100220850:+_P1	Fv1	3549	chr1	100220804	100220805	+	0
chr1	101010755	101010827	-	37.0259	chr1:101010755:101010827:-_P1	Scaf1	2489	chr1	101010758	101010759	-	0
chr1	101700475	101700756	-	7.73542	chr1:101700475:101700756:-_P1	Sphk2	3198	chr1	101700509	101700510	-	0
chr1	101700808	101700969	+	351.323	chr1:101700808:101700969:+_P1	Rpl18	1004	chr1	101700902	101700903	+	0
chr1	106874589	106874786	+	15.3197	chr1:106874589:106874786:+_P1	Ano5	22002	chr1	106874899	106874900	+	113
chr1	124816058	124816330	-	18.9971	chr1:124816058:124816330:-_P1	Klf13	12695	chr1	124816465	124816466	-	135
chr1	127298535	127298629	-	7.3716	chr1:127298535:127298629:-_P1	Lrrk1	6445	chr1	127298759	127298760	-	130
chr1	127599627	127599698	+	2.31167	chr1:127599627:127599698:+_P1	Lins1	4497	chr1	127599643	127599644	+	0
chr1	141452509	141452581	-	0.817201	chr1:141452509:141452581:-_P1	Kif7	1434	chr1	141452520	141452521	-	0
chr1	141672601	141672699	+	0.951535	chr1:141672601:141672699:+_P1	Zfp710	95239	chr1	141672741	141672742	+	42
chr1	141973272	141973389	+	8.33433	chr1:141973272:141973389:+_P1	Sema4b	12754	chr1	141972821	141972822	+	450
chr1	142020690	142020785	+	7.35481	chr1:142020690:142020785:+_P1	Ttll13	13636	chr1	142020727	142020728	+	0
chr1	153791097	153791150	+	0.71645	chr1:153791097:153791150:+_P1	Me3	70417	chr1	153791146	153791147	+	0
chr1	162307758	162307794	+	3.20164	chr1:162307758:162307794:+_P1	Kctd21	12934	chr1	162307780	162307781	+	0
chr1	162549091	162549224	-	31.2719	chr1:162549091:162549224:-_P1	Aamdc	15198	chr1	162549195	162549196	-	0
chr1	163635718	163635863	-	15.0343	chr1:163635718:163635863:-_P1	Emsy	24419	chr1	163636060	163636061	-	197
chr1	163795691	163795810	+	0.772422	chr1:163795691:163795810:+_P1	Wnt11	1848	chr1	163795793	163795794	+	0
chr1	164337098	164337297	+	11.4296	chr1:164337098:164337297:+_P1	Gdpd5	43278	chr1	164337139	164337140	+	0
chr1	166045159	166045247	-	1.74635	chr1:166045159:166045247:-_P1	P2ry2	7735	chr1	166045498	166045499	-	251
chr1	166045381	166045525	-	8.98921	chr1:166045381:166045525:-_P1	P2ry2	7957	chr1	166045498	166045499	-	0
chr1	166459042	166459106	+	5.50211	chr1:166459042:166459106:+_P1	Arap1	18897	chr1	166459067	166459068	+	0
chr1	166920701	166920757	-	5.45174	chr1:166920701:166920757:-_P1	Folr2	1399	chr1	166920733	166920734	-	0
chr1	166981770	166981829	+	7.53392	chr1:166981770:166981829:+_P1	Anapc15	1344	chr1	166981740	166981741	+	29
chr1	167017176	167017233	-	1.50007	chr1:167017176:167017233:-_P1	Lrrc51	11337	chr1	167017202	167017203	-	0
chr1	167864334	167864379	+	1.18662	chr1:167864334:167864379:+_P1	Olr63	6071	chr1	167864203	167864204	+	130
chr1	167864527	167864582	+	2.57474	chr1:167864527:167864582:+_P1	Olr63	5868	chr1	167864203	167864204	+	323
chr1	167924044	167924203	-	1.4273	chr1:167924044:167924203:-_P1	Olr59	12083	chr1	167924167	167924168	-	0
chr1	169540162	169540212	-	2.33966	chr1:169540162:169540212:-_P1	Trim5	5266	chr1	169540198	169540199	-	0
chr1	170405836	170405900	-	3.51508	chr1:170405836:170405900:-_P1	Apbb1	1780	chr1	170406014	170406015	-	114
chr1	170410789	170410871	-	13.1704	chr1:170410789:170410871:-_P1	Apbb1	6733	chr1	170410894	170410895	-	23
chr1	170411083	170411287	-	22.445	chr1:170411083:170411287:-_P1	Apbb1	7027	chr1	170411256	170411257	-	0
chr1	173233672	173233738	+	7.90334	chr1:173233672:173233738:+_P1	Gvin1	18318	chr1	173233707	173233708	+	0
chr1	185631011	185631321	+	5.68122	chr1:185631011:185631321:+_P1	Sox6	41854	chr1	185631106	185631107	+	0
chr1	185634720	185634807	+	2.91058	chr1:185634720:185634807:+_P1	Sox6	38368	chr1	185634796	185634797	+	0
chr1	186977513	186977596	+	4.34348	chr1:186977513:186977596:+_P1	Xylt1	171855	chr1	186977930	186977931	+	334
chr1	190604798	190604934	+	9.25788	chr1:190604798:190604934:+_P1	Uqcrc2	49621	chr1	190604919	190604920	+	0
chr1	197636189	197636372	+	15.5268	chr1:197636189:197636372:+_P1	Sbk1	22813	chr1	197636212	197636213	+	0
chr1	198451009	198451149	-	11.8326	chr1:198451009:198451149:-_P1	Pagr1	321	chr1	198450687	198450688	-	321
chr1	198680670	198680783	+	10.5061	chr1:198680670:198680783:+_P1	Znf48	1445	chr1	198680438	198680439	+	231
chr1	199320804	199320838	+	2.32846	chr1:199320804:199320838:+_P1	Zfp646	2788	chr1	199320739	199320740	+	64
chr1	199321210	199321329	+	3.45351	chr1:199321210:199321329:+_P1	Zfp646	2297	chr1	199320739	199320740	+	470
chr1	204096152	204096229	-	1.38812	chr1:204096152:204096229:-_P1	Cpxm2	9151	chr1	204096253	204096254	-	24
chr1	205136907	205137278	-	18.8964	chr1:205136907:205137278:-_P1	Ctbp2	96152	chr1	205137172	205137173	-	0
chr1	212359150	212359319	-	27.1747	chr1:212359150:212359319:-_P1	Tubgcp2	4877	chr1	212359130	212359131	-	19
chr1	212359551	212359596	-	1.72955	chr1:212359551:212359596:-_P1	Tubgcp2	5278	chr1	212359130	212359131	-	420
chr1	213734574	213734666	+	5.22225	chr1:213734574:213734666:+_P1	Pgghg	3120	chr1	213734617	213734618	+	0
chr1	214270134	214270257	-	1.28177	chr1:214270134:214270257:-_P1	Sct	4466	chr1	214270218	214270219	-	0
chr1	215010881	215010973	-	37.1882	chr1:215010881:215010973:-_P1	Dusp8	22485	chr1	215010946	215010947	-	0
chr1	215539411	215539444	-	1.03549	chr1:215539411:215539444:-_P1	Ifitm10	2431	chr1	215539457	215539458	-	13
chr1	215602189	215602235	+	0.727644	chr1:215602189:215602235:+_P1	Syt8	3167	chr1	215602212	215602213	+	0
chr1	218568146	218568261	+	13.9036	chr1:218568146:218568261:+_P1	Cpt1a	1247	chr1	218568107	218568108	+	38
chr1	219424473	219424520	-	6.32491	chr1:219424473:219424520:-_P1	Carns1	2205	chr1	219424505	219424506	-	0
chr1	220067275	220067373	+	1.8415	chr1:220067275:220067373:+_P1	AC126581.1	4436	chr1	220067328	220067329	+	0
chr1	220189659	220189733	-	15.9354	chr1:220189659:220189733:-_P1	Dpp3	1118	chr1	220189709	220189710	-	0
chr1	220890723	220890785	-	3.24082	chr1:220890723:220890785:-_P1	1700020D05Rik	7661	chr1	220890748	220890749	-	0
chr1	221018313	221018402	-	36.5669	chr1:221018313:221018402:-_P1	Sipa1	2384	chr1	221018438	221018439	-	36
chr1	222669264	222669267	+	0.615699	chr1:222669264:222669267:+_P1	RGD1560108	3232	chr1	222669648	222669649	+	381
chr1	224924325	224924353	+	0.570921	chr1:224924325:224924353:+_P1	AC099294.1	3409	chr1	224923831	224923832	+	493
chr1	226066727	226066872	+	10.993	chr1:226066727:226066872:+_P1	Rab3il1	10246	chr1	226066781	226066782	+	0
chr1	226066727	226066872	+	10.993	chr1:226066727:226066872:+_P1	Rab3il1	10246	chr1	226066806	226066807	+	0
chr1	226256148	226256225	+	88.4983	chr1:226256148:226256225:+_P1	AABR07006258.2	2190	chr1	226256165	226256166	+	0
chr1	226630932	226631045	+	9.0116	chr1:226630932:226631045:+_P1	Cyb561a3	2962	chr1	226630943	226630944	+	0
chr1	227668596	227668689	+	0.486962	chr1:227668596:227668689:+_P1	AABR07006269.1	1468	chr1	227668602	227668603	+	0
chr1	227668596	227668689	+	0.486962	chr1:227668596:227668689:+_P1	AABR07006269.1	1468	chr1	227668627	227668628	+	0
chr1	236758619	236758667	-	8.61419	chr1:236758619:236758667:-_P1	Prune2	29207	chr1	236758862	236758863	-	195
chr1	245516989	245517093	-	23.4022	chr1:245516989:245517093:-_P1	Pum3	2737	chr1	245517044	245517045	-	0
chr1	248112632	248112664	+	3.78375	chr1:248112632:248112664:+_P1	Il33	19424	chr1	248112646	248112647	+	0
chr1	250664618	250664689	-	12.1796	chr1:250664618:250664689:-_P1	Asah2	33941	chr1	250664895	250664896	-	206
chr1	252490897	252491484	+	8.50224	chr1:252490897:252491484:+_P1	Stambpl1	5966	chr1	252491365	252491366	+	0
chr1	253053785	253054068	-	2.8714	chr1:253053785:253054068:-_P1	Slc16a12	53025	chr1	253054210	253054211	-	142
chr1	253220050	253220138	+	1.65679	chr1:253220050:253220138:+_P1	Kif20b	1672	chr1	253220088	253220089	+	0
chr1	255842474	255842562	-	4.17556	chr1:255842474:255842562:-_P1	Cpeb3	26741	chr1	255842432	255842433	-	41
chr1	259488298	259488329	-	0.929146	chr1:259488298:259488329:-_P1	Sorbs1	3729	chr1	259488437	259488438	-	108
chr1	259596123	259596322	-	194.505	chr1:259596123:259596322:-_P1	LOC108348083	78101	chr1	259596323	259596324	-	1
chr1	264765241	264765328	+	5.28382	chr1:264765241:264765328:+_P1	Lzts2	2775	chr1	264765117	264765118	+	123
chr1	265100065	265100259	+	32.0108	chr1:265100065:265100259:+_P1	Btrc	57118	chr1	265100132	265100133	+	0
chr1	265100408	265100540	+	0.582115	chr1:265100408:265100540:+_P1	Btrc	56837	chr1	265100132	265100133	+	275
chr1	266866724	266866895	-	2226.6	chr1:266866724:266866895:-_P1	LOC103693430	3882	chr1	266866859	266866860	-	0
chr1	274373958	274374134	+	3.11208	chr1:274373958:274374134:+_P1	Rbm20	17796	chr1	274374008	274374009	+	0
chr1	274662968	274663071	-	7.27085	chr1:274662968:274663071:-_P1	Bbip1	12605	chr1	274663358	274663359	-	287
chr1	274663244	274663341	-	2.8714	chr1:274663244:274663341:-_P1	Bbip1	12881	chr1	274663358	274663359	-	17
chr1	274663610	274663719	+	31.2943	chr1:274663610:274663719:+_P1	Shoc2	24859	chr1	274663663	274663664	+	0
chr1	277637608	277637706	-	19.0251	chr1:277637608:277637706:-_P1	Ccdc186	8412	chr1	277637686	277637687	-	0
chr1	278065168	278065343	-	29.0722	chr1:278065168:278065343:-_P1	AABR07007032.1	22856	chr1	278065398	278065399	-	55
chr1	282513059	282513149	-	5.65324	chr1:282513059:282513149:-_P1	AABR07007130.2	14179	chr1	282513131	282513132	-	0
chr10	11901882	11901953	+	2.76505	chr10:11901882:11901953:+_P1	Zfp597	10588	chr10	11901942	11901943	+	0
chr10	13141581	13141631	+	54.2487	chr10:13141581:13141631:+_P1	Srrm2	3466	chr10	13142000	13142001	+	369
chr10	14634564	14634681	-	33.4157	chr10:14634564:14634681:-_P1	Ube2i	4413	chr10	14634716	14634717	-	35
chr10	14635103	14635134	-	0.755631	chr10:14635103:14635134:-_P1	Ube2i	4952	chr10	14634716	14634717	-	386
chr10	14635468	14635581	-	9.06757	chr10:14635468:14635581:-_P1	Ube2i	5317	chr10	14635565	14635566	-	0
chr10	15176457	15176552	+	1.15304	chr10:15176457:15176552:+_P1	Fbxl16	7249	chr10	15176512	15176513	+	0
chr10	16047065	16047286	-	57.7582	chr10:16047065:16047286:-_P1	Cpeb4	1032	chr10	16047274	16047275	-	0
chr10	19603114	19603179	-	3.03372	chr10:19603114:19603179:-_P1	AABR07029272.1	29020	chr10	19603152	19603153	-	0
chr10	34256046	34256145	-	4.14757	chr10:34256046:34256145:-_P1	RGD1559575	13061	chr10	34256226	34256227	-	81
chr10	34443388	34443574	-	34.2161	chr10:34443388:34443574:-_P1	Btnl9	3918	chr10	34443524	34443525	-	0
chr10	34443739	34443755	-	1.57283	chr10:34443739:34443755:-_P1	Btnl9	4269	chr10	34443524	34443525	-	214
chr10	34477103	34477355	+	19.0027	chr10:34477103:34477355:+_P1	Zfp62	12583	chr10	34477159	34477160	+	0
chr10	36406725	36406779	-	1.82471	chr10:36406725:36406779:-_P1	Zfp2	4106	chr10	36406746	36406747	-	0
chr10	37314218	37314375	-	4.36027	chr10:37314218:37314375:-_P1	Jade2	2593	chr10	37314423	37314424	-	48
chr10	37315593	37315671	-	1.88068	chr10:37315593:37315671:-_P1	Jade2	3968	chr10	37316095	37316096	-	424
chr10	40303033	40303108	-	4.75767	chr10:40303033:40303108:-_P1	Tnip1	6563	chr10	40303089	40303090	-	0
chr10	42932955	42933063	-	32.3074	chr10:42932955:42933063:-_P1	AABR07029651.1	4494	chr10	42933004	42933005	-	0
chr10	43526109	43526213	-	13.6069	chr10:43526109:43526213:-_P1	AABR07029661.1	13822	chr10	43526548	43526549	-	335
chr10	44149964	44150004	-	1.53925	chr10:44149964:44150004:-_P1	Olr1424	2929	chr10	44149985	44149986	-	0
chr10	45483455	45483615	-	98.7749	chr10:45483455:45483615:-_P1	Obscn	2447	chr10	45483557	45483558	-	0
chr10	45819509	45819612	-	1.81911	chr10:45819509:45819612:-_P1	Zfp867	6868	chr10	45819588	45819589	-	0
chr10	46412045	46412129	-	1.99263	chr10:46412045:46412129:-_P1	Pemt	7403	chr10	46412100	46412101	-	0
chr10	46720231	46720395	+	7.28764	chr10:46720231:46720395:+_P1	Drc3	1712	chr10	46719818	46719819	+	412
chr10	46969466	46969542	+	2.40123	chr10:46969466:46969542:+_P1	Mief2	2494	chr10	46969762	46969763	+	220
chr10	48773907	48774109	-	1.6456	chr10:48773907:48774109:-_P1	Ncor1	1017	chr10	48773481	48773482	-	425
chr10	54010710	54010785	+	0.677269	chr10:54010710:54010785:+_P1	AABR07029836.1	88512	chr10	54010754	54010755	+	0
chr10	54010959	54011030	+	0.979521	chr10:54010959:54011030:+_P1	AABR07029836.1	88761	chr10	54010754	54010755	+	204
chr10	55593311	55593383	-	4.00764	chr10:55593311:55593383:-_P1	Pfas	3333	chr10	55593361	55593362	-	0
chr10	55681809	55681891	+	27.9695	chr10:55681809:55681891:+_P1	Per1	5157	chr10	55681836	55681837	+	0
chr10	56009894	56009915	-	0.83959	chr10:56009894:56009915:-_P1	Kdm6b	1009	chr10	56009989	56009990	-	74
chr10	58776460	58776549	-	1.97024	chr10:58776460:58776549:-_P1	RGD1304728	4552	chr10	58776535	58776536	-	0
chr10	58776677	58776766	-	0.850784	chr10:58776677:58776766:-_P1	RGD1304728	4769	chr10	58776535	58776536	-	141
chr10	61744593	61744821	+	5.26143	chr10:61744593:61744821:+_P1	Tsr1	1259	chr10	61745182	61745183	+	361
chr10	62296565	62296608	+	0.666074	chr10:62296565:62296608:+_P1	Tlcd2	7052	chr10	62296959	62296960	+	351
chr10	62648979	62649188	+	8.55262	chr10:62648979:62649188:+_P1	Tp53i13	1529	chr10	62648845	62648846	+	133
chr10	63798918	63799105	+	30.5891	chr10:63798918:63799105:+_P1	Myo1c	4202	chr10	63799579	63799580	+	474
chr10	64140219	64140296	-	4.18116	chr10:64140219:64140296:-_P1	Rph3al	31665	chr10	64140264	64140265	-	0
chr10	66865742	66865832	-	1.75194	chr10:66865742:66865832:-_P1	Evi2b	7144	chr10	66865944	66865945	-	112
chr10	70261925	70261984	-	0.889965	chr10:70261925:70261984:-_P1	Nle1	2372	chr10	70261944	70261945	-	0
chr10	70516503	70516579	+	2.99454	chr10:70516503:70516579:+_P1	Ap2b1	3625	chr10	70516477	70516478	+	25
chr10	72197972	72198048	-	4.24273	chr10:72197972:72198048:-_P1	Pigw	1535	chr10	72198026	72198027	-	0
chr10	72198365	72198457	-	3.97406	chr10:72198365:72198457:-_P1	Pigw	1928	chr10	72198026	72198027	-	338
chr10	73807427	73807578	+	17.984	chr10:73807427:73807578:+_P1	Rnft1	1577	chr10	73807462	73807463	+	0
chr10	73865586	73865686	+	2.03181	chr10:73865586:73865686:+_P1	Tubd1	3255	chr10	73865588	73865589	+	0
chr10	74885703	74885843	+	12.7618	chr10:74885703:74885843:+_P1	Mtmr4	1140	chr10	74885620	74885621	+	82
chr10	74957257	74957349	+	2.32846	chr10:74957257:74957349:+_P1	Rnf43	1934	chr10	74957275	74957276	+	0
chr10	75398431	75398485	+	2.26129	chr10:75398431:75398485:+_P1	Vezf1	32609	chr10	75398586	75398587	+	101
chr10	75527169	75527311	+	8.04887	chr10:75527169:75527311:+_P1	Mrps23	1696	chr10	75526931	75526932	+	237
chr10	76169090	76169237	-	4.66812	chr10:76169090:76169237:-_P1	Akap1	2814	chr10	76169355	76169356	-	118
chr10	76182859	76182973	-	1.11386	chr10:76182859:76182973:-_P1	Akap1	16583	chr10	76183425	76183426	-	452
chr10	76183860	76184074	-	116.283	chr10:76183860:76184074:-_P1	Akap1	17584	chr10	76184119	76184120	-	45
chr10	81588019	81588134	+	1.11945	chr10:81588019:81588134:+_P1	Mbtd1	3978	chr10	81587976	81587977	+	42
chr10	82230771	82230933	-	3.54867	chr10:82230771:82230933:-_P1	Epn3	1631	chr10	82230981	82230982	-	48
chr10	84656674	84656911	+	73.0723	chr10:84656674:84656911:+_P1	Cbx1	13001	chr10	84656715	84656716	+	0
chr10	85355450	85355521	+	7.62347	chr10:85355450:85355521:+_P1	Arhgap23	29358	chr10	85355461	85355462	+	0
chr10	85380899	85380946	+	2.03181	chr10:85380899:85380946:+_P1	Arhgap23	3933	chr10	85380952	85380953	+	6
chr10	86776326	86776467	+	7.39399	chr10:86776326:86776467:+_P1	AC141969.1	13209	chr10	86776362	86776363	+	0
chr10	86848627	86848733	+	12.8513	chr10:86848627:86848733:+_P1	Rara	11950	chr10	86848680	86848681	+	0
chr10	89562228	89562230	-	1.2202	.	Brca1	107547	chr10	89562229	89562230	-	0
chr10	90242233	90242492	-	8.08245	chr10:90242233:90242492:-_P1	Atxn7l3	1724	chr10	90241820	90241821	-	412
chr10	91186123	91186187	+	3.4871	chr10:91186123:91186187:+_P1	Acbd4	1404	chr10	91186136	91186137	+	0
chr10	92492533	92492722	-	13.4334	chr10:92492533:92492722:-_P1	Kansl1	16424	chr10	92492678	92492679	-	0
chr10	92601727	92601797	+	2.38443	chr10:92601727:92601797:+_P1	Myl4	26557	chr10	92602137	92602138	+	340
chr10	95768709	95768750	+	18.5941	chr10:95768709:95768750:+_P1	Helz	1402	chr10	95768723	95768724	+	0
chr10	98308079	98308156	-	1.28177	chr10:98308079:98308156:-_P1	Abca8	13557	chr10	98308128	98308129	-	0
chr10	98471946	98472070	-	4.5114	chr10:98471946:98472070:-_P1	Abca9	2147	chr10	98472034	98472035	-	0
chr10	104305735	104305848	+	18.7005	chr10:104305735:104305848:+_P1	Tmem94	14893	chr10	104305753	104305754	+	0
chr10	104307058	104307186	+	1.86389	chr10:104307058:104307186:+_P1	Tmem94	13555	chr10	104307040	104307041	+	17
chr10	106241049	106241438	+	33.4437	chr10:106241049:106241438:+_P1	2009-09-01	22994	chr10	106241353	106241354	+	0
chr10	106259187	106259241	+	1.0131	chr10:106259187:106259241:+_P1	2009-09-01	5191	chr10	106259250	106259251	+	9
chr10	106783359	106783472	-	4.74088	chr10:106783359:106783472:-_P1	AABR07030861.1	1409	chr10	106783420	106783421	-	0
chr10	108479089	108479164	+	4.6961	chr10:108479089:108479164:+_P1	Slc26a11	1202	chr10	108479038	108479039	+	50
chr10	109893585	109893777	-	26.7941	chr10:109893585:109893777:-_P1	AABR07030926.1	1706	chr10	109893647	109893648	-	0
chr10	109893585	109893777	-	26.7941	chr10:109893585:109893777:-_P1	AABR07030926.1	1706	chr10	109893756	109893757	-	0
chr10	110110408	110110523	-	2.07099	chr10:110110408:110110523:-_P1	Ccdc57	8536	chr10	110110480	110110481	-	0
chr10	110626947	110627072	+	20.2229	chr10:110626947:110627072:+_P1	Fn3k	4420	chr10	110626880	110626881	+	66
chr11	24234598	24234623	+	2.4628	chr11:24234598:24234623:+_P1	Gabpa	28656	chr11	24234344	24234345	+	253
chr11	32620150	32620360	-	47.3417	chr11:32620150:32620360:-_P1	Rcan1	69611	chr11	32620360	32620361	-	0
chr11	42895564	42895898	+	66.0477	chr11:42895564:42895898:+_P1	Arl6	37086	chr11	42895642	42895643	+	0
chr11	43028701	43028807	-	6.49842	chr11:43028701:43028807:-_P1	Riox2	6136	chr11	43028769	43028770	-	0
chr11	44176477	44176580	+	2.4572	chr11:44176477:44176580:+_P1	St3gal6	16358	chr11	44176521	44176522	+	0
chr11	44176681	44177193	+	37.4569	chr11:44176681:44177193:+_P1	St3gal6	15745	chr11	44176521	44176522	+	159
chr11	45031649	45031742	+	4.83604	chr11:45031649:45031742:+_P1	Col8a1	153790	chr11	45031693	45031694	+	0
chr11	45274868	45275166	-	8.25037	chr11:45274868:45275166:-_P1	Filip1l	150445	chr11	45274883	45274884	-	0
chr11	46422706	46422785	-	6.62716	chr11:46422706:46422785:-_P1	Abi3bp	53129	chr11	46422757	46422758	-	0
chr11	47055709	47055865	+	154.35	chr11:47055709:47055865:+_P1	Pcnp	5487	chr11	47055739	47055740	+	0
chr11	55242488	55242553	-	0.509351	chr11:55242488:55242553:-_P1	Dppa4	2247	chr11	55242531	55242532	-	0
chr11	59442126	59442805	-	28.9658	chr11:59442126:59442805:-_P1	Lsamp	331564	chr11	59442755	59442756	-	0
chr11	67717573	67717786	-	70.4416	chr11:67717573:67717786:-_P1	Kpna1	14548	chr11	67717742	67717743	-	0
chr11	67757919	67758034	-	17.094	chr11:67757919:67758034:-_P1	Parp9	1120	chr11	67758014	67758015	-	0
chr11	68435027	68435122	-	3.28559	chr11:68435027:68435122:-_P1	Sema5b	85789	chr11	68435418	68435419	-	296
chr11	71143251	71143410	+	1.90867	chr11:71143251:71143410:+_P1	Rubcn	7720	chr11	71143736	71143737	+	326
chr11	72748578	72748779	+	81.1883	chr11:72748578:72748779:+_P1	Apod	43449	chr11	72748558	72748559	+	19
chr11	72748995	72749010	+	0.822798	chr11:72748995:72749010:+_P1	Apod	43866	chr11	72748558	72748559	+	436
chr11	75606353	75606463	+	19.0419	chr11:75606353:75606463:+_P1	Mb21d2	172156	chr11	75606577	75606578	+	114
chr11	84049807	84049975	-	216.748	chr11:84049807:84049975:-_P1	Ap2m1	2261	chr11	84049944	84049945	-	0
chr11	84643607	84643727	-	143.962	chr11:84643607:84643727:-_P1	Klhl24	10103	chr11	84643703	84643704	-	0
chr11	86091003	86091061	+	1.06908	chr11:86091003:86091061:+_P1	AABR07034739.1	1405	chr11	86090720	86090721	+	282
chr11	86793918	86794053	+	51.2821	chr11:86793918:86794053:+_P1	Tango2	3502	chr11	86793956	86793957	+	0
chr11	88185943	88186040	-	2.64191	chr11:88185943:88186040:-_P1	Ypel1	5401	chr11	88186019	88186020	-	0
chr11	88649558	88649643	+	4.10279	chr11:88649558:88649643:+_P1	Fgd4	49577	chr11	88649401	88649402	+	156
chr11	88680710	88680735	+	0.643685	chr11:88680710:88680735:+_P1	Fgd4	18485	chr11	88680868	88680869	+	133
chr12	4719148	4719231	+	4.76327	chr12:4719148:4719231:+_P1	AABR07035107.1	18584	chr12	4718912	4718913	+	235
chr12	5509369	5509448	-	3.35276	chr12:5509369:5509448:-_P1	Zfp958	18434	chr12	5509654	5509655	-	206
chr12	5885195	5885301	-	6.129	chr12:5885195:5885301:-_P1	Fry	62321	chr12	5885399	5885400	-	98
chr12	6385957	6386072	+	15.2358	chr12:6385957:6386072:+_P1	B3glct	17866	chr12	6385987	6385988	+	0
chr12	9999931	10000017	-	168.276	chr12:9999931:10000017:-_P1	Rpl21	1152	chr12	9999970	9999971	-	0
chr12	10037454	10037598	+	11.9446	chr12:10037454:10037598:+_P1	Usp12	25517	chr12	10037516	10037517	+	0
chr12	12961080	12961171	-	2.4516	chr12:12961080:12961171:-_P1	Cyth3	15888	chr12	12961326	12961327	-	155
chr12	13728776	13728819	+	1.44969	chr12:13728776:13728819:+_P1	Fbxl18	5608	chr12	13728841	13728842	+	22
chr12	13807799	13808160	+	20.6651	chr12:13807799:13808160:+_P1	Tnrc18	2018	chr12	13807832	13807833	+	0
chr12	16161981	16162092	+	0.682866	chr12:16161981:16162092:+_P1	Grifin	8068	chr12	16162009	16162010	+	0
chr12	16213228	16213267	-	1.2314	chr12:16213228:16213267:-_P1	Chst12	11596	chr12	16213503	16213504	-	236
chr12	16218327	16218438	-	7.24286	chr12:16218327:16218438:-_P1	Chst12	16695	chr12	16218374	16218375	-	0
chr12	16398704	16398739	-	4.0972	chr12:16398704:16398739:-_P1	Nudt1	3675	chr12	16398723	16398724	-	0
chr12	17533218	17533329	-	41.291	chr12:17533218:17533329:-_P1	Sun1	10684	chr12	17533368	17533369	-	39
chr12	19298082	19298157	-	4.18675	chr12:19298082:19298157:-_P1	Zfp113	3194	chr12	19298183	19298184	-	26
chr12	22251566	22251703	-	23.766	chr12:22251566:22251703:-_P1	Gigyf1	6466	chr12	22251867	22251868	-	164
chr12	22251809	22251880	-	1.36014	chr12:22251809:22251880:-_P1	Gigyf1	6709	chr12	22251867	22251868	-	0
chr12	22799357	22799406	-	4.05802	chr12:22799357:22799406:-_P1	Ift22	11650	chr12	22799470	22799471	-	64
chr12	25114104	25114179	+	4.45542	chr12:25114104:25114179:+_P1	Lat2	5174	chr12	25114122	25114123	+	0
chr12	25554593	25554647	-	1.03549	chr12:25554593:25554647:-_P1	Castor2	84148	chr12	25554540	25554541	-	52
chr12	27153961	27154251	+	14.1835	chr12:27153961:27154251:+_P1	AABR07035916.1	1334	chr12	27154179	27154180	+	0
chr12	28074210	28074367	+	4.15877	chr12:28074210:28074367:+_P1	Auts2	137964	chr12	28074343	28074344	+	0
chr12	28134977	28135117	+	12.5491	chr12:28134977:28135117:+_P1	Auts2	77214	chr12	28135006	28135007	+	0
chr12	30004650	30004754	-	15.9298	chr12:30004650:30004754:-_P1	Rabgef1	15691	chr12	30004702	30004703	-	0
chr12	30160718	30160776	+	3.41993	chr12:30160718:30160776:+_P1	Asl	4916	chr12	30160951	30160952	+	175
chr12	30160941	30160992	+	1.21461	chr12:30160941:30160992:+_P1	Asl	4700	chr12	30160951	30160952	+	0
chr12	30160941	30160992	+	1.21461	chr12:30160941:30160992:+_P1	Asl	4700	chr12	30160953	30160954	+	0
chr12	30160941	30160992	+	1.21461	chr12:30160941:30160992:+_P1	Asl	4700	chr12	30160981	30160982	+	0
chr12	37576590	37576656	-	1.6288	chr12:37576590:37576656:-_P1	Kmt5a	1840	chr12	37576716	37576717	-	60
chr12	37581123	37581213	-	8.27276	chr12:37581123:37581213:-_P1	Kmt5a	6373	chr12	37581182	37581183	-	0
chr12	37771273	37771659	+	12.8345	chr12:37771273:37771659:+_P1	Pitpnm2	33671	chr12	37771342	37771343	+	0
chr12	38961730	38961774	+	0.65488	chr12:38961730:38961774:+_P1	Morn3	3287	chr12	38961750	38961751	+	0
chr12	39420127	39420316	+	24.4153	chr12:39420127:39420316:+_P1	Ift81	3278	chr12	39420149	39420150	+	0
chr12	40016567	40016693	+	2.82662	chr12:40016567:40016693:+_P1	Cux2	2242	chr12	40016617	40016618	+	0
chr12	40230387	40230582	-	6.63836	chr12:40230387:40230582:-_P1	Pheta1	3090	chr12	40230567	40230568	-	0
chr12	46862751	46862816	+	3.00013	chr12:46862751:46862816:+_P1	Sirt4	5598	chr12	46862771	46862772	+	0
chr12	47920454	47920489	-	10.4445	chr12:47920454:47920489:-_P1	Mvk	1054	chr12	47920470	47920471	-	0
chr12	48381928	48381955	+	2.73706	chr12:48381928:48381955:+_P1	Ssh1	21840	chr12	48381928	48381929	+	0
chr12	48566621	48566780	+	18.7117	chr12:48566621:48566780:+_P1	Selplg	11123	chr12	48566660	48566661	+	0
chr12	48754311	48754370	+	3.80054	chr12:48754311:48754370:+_P1	Cmklr1	34889	chr12	48754289	48754290	+	21
chr12	48778812	48778924	+	4.55617	chr12:48778812:48778924:+_P1	Cmklr1	10335	chr12	48778533	48778534	+	278
chr12	49417975	49418105	+	10.327	chr12:49417975:49418105:+_P1	RGD1306556	1475	chr12	49418048	49418049	+	0
chr12	50315777	50315872	-	6.47603	chr12:50315777:50315872:-_P1	Hps4	1371	chr12	50315863	50315864	-	0
chr13	24630714	24630854	+	3.65501	chr13:24630714:24630854:+_P1	Cdh20	192632	chr13	24630768	24630769	+	0
chr13	35531336	35531548	-	37.8319	chr13:35531336:35531548:-_P1	Ralb	20316	chr13	35531501	35531502	-	0
chr13	35673829	35673940	-	1.35454	chr13:35673829:35673940:-_P1	Epb41l5	4861	chr13	35673874	35673875	-	0
chr13	36035265	36035319	+	0.503754	chr13:36035265:36035319:+_P1	Sctr	3962	chr13	36035285	36035286	+	0
chr13	36296812	36296903	-	4.97037	chr13:36296812:36296903:-_P1	Steap3	6281	chr13	36296936	36296937	-	33
chr13	43606131	43606197	-	1.237	chr13:43606131:43606197:-_P1	LOC100909582	39451	chr13	43606398	43606399	-	201
chr13	43606347	43606452	-	8.3903	chr13:43606347:43606452:-_P1	LOC100909582	39667	chr13	43606398	43606399	-	0
chr13	47871425	47871728	-	153.32	chr13:47871425:47871728:-_P1	Mapkapk2	40315	chr13	47871705	47871706	-	0
chr13	51280892	51280964	+	10.2094	chr13:51280892:51280964:+_P1	Klhl12	1718	chr13	51280920	51280921	+	0
chr13	51790870	51790903	+	0.744436	chr13:51790870:51790903:+_P1	Ube2t	4962	chr13	51790910	51790911	+	7
chr13	55617345	55617550	-	83.2929	chr13:55617345:55617550:-_P1	Nek7	55595	chr13	55617531	55617532	-	0
chr13	67611560	67611665	-	10.3437	chr13:67611560:67611665:-_P1	Odr4	2091	chr13	67611574	67611575	-	0
chr13	69474754	69475110	-	48.5843	chr13:69474754:69475110:-_P1	RGD1309104	89680	chr13	69475094	69475095	-	0
chr13	70632127	70632197	-	2.89938	chr13:70632127:70632197:-_P1	Lamc2	5875	chr13	70632198	70632199	-	1
chr13	71188742	71188809	+	0.923549	chr13:71188742:71188809:+_P1	Rnasel	3331	chr13	71188739	71188740	+	2
chr13	74333177	74333594	-	51.534	chr13:74333177:74333594:-_P1	Fam20b	1963	chr13	74333458	74333459	-	0
chr13	78973639	78973696	+	0.985119	chr13:78973639:78973696:+_P1	AC127084.1	5623	chr13	78973573	78973574	+	65
chr13	82607758	82607847	+	3.49829	chr13:82607758:82607847:+_P1	Nme7	18836	chr13	82608135	82608136	+	288
chr13	89606634	89606718	-	2.89938	chr13:89606634:89606718:-_P1	Fcer1g	308	chr13	89606325	89606326	-	308
chr13	89708336	89708692	+	17.3627	chr13:89708336:89708692:+_P1	Dedd	9372	chr13	89708796	89708797	+	104
chr13	91984884	91984895	-	0.391809	chr13:91984884:91984895:-_P1	AABR07021804.1	3452	chr13	91985326	91985327	-	431
chr13	95581993	95582051	+	4.99836	chr13:95581993:95582051:+_P1	Zbtb18	7615	chr13	95582238	95582239	+	187
chr13	95582238	95582241	+	0.705255	chr13:95582238:95582241:+_P1	Zbtb18	7425	chr13	95582238	95582239	+	0
chr13	95944053	95944100	+	0.699658	chr13:95944053:95944100:+_P1	AABR07021863.1	39707	chr13	95943924	95943925	+	128
chr13	98539256	98539321	-	20.374	chr13:98539256:98539321:-_P1	Psen2	8532	chr13	98539297	98539298	-	0
chr13	99102726	99102852	-	587.959	chr13:99102726:99102852:-_P1	H3f3b	1518	chr13	99102873	99102874	-	21
chr13	99468803	99468866	+	0.783617	chr13:99468803:99468866:+_P1	Cnih4	4176	chr13	99469361	99469362	+	495
chr13	99533963	99533998	-	0.453378	chr13:99533963:99533998:-_P1	Wdr26	2004	chr13	99533997	99533998	-	0
chr13	100453624	100453672	-	1.61201	chr13:100453624:100453672:-_P1	AABR07021955.1	3415	chr13	100453552	100453553	-	71
chr13	100453797	100453916	-	35.8729	chr13:100453797:100453916:-_P1	AABR07021955.1	3588	chr13	100453893	100453894	-	0
chr13	101789208	101789312	+	4.47781	chr13:101789208:101789312:+_P1	Taf1a	1551	chr13	101789296	101789297	+	0
chr13	109504214	109504268	+	1.8415	chr13:109504214:109504268:+_P1	Angel2	1427	chr13	109504669	109504670	+	401
chr13	110396886	110397332	+	18.902	chr13:110396886:110397332:+_P1	Lpgat1	1466	chr13	110396937	110396938	+	0
chr13	110801775	110801885	-	5.30061	chr13:110801775:110801885:-_P1	Traf5	17566	chr13	110801839	110801840	-	0
chr13	111996491	111996536	-	0.94034	chr13:111996491:111996536:-_P1	G0s2	8514	chr13	111996844	111996845	-	308
chr14	1339569	1339613	+	1.66239	chr14:1339569:1339613:+_P1	AABR07014114.1	15389	chr14	1339586	1339587	+	0
chr14	5035952	5036120	-	13.0136	chr14:5035952:5036120:-_P1	Zfp326	2010	chr14	5036197	5036198	-	77
chr14	5166763	5166824	-	1.09147	chr14:5166763:5166824:-_P1	Lrrc8d	65586	chr14	5166671	5166672	-	91
chr14	5480608	5480712	-	28.4285	chr14:5480608:5480712:-_P1	Lrrc8b	51851	chr14	5480702	5480703	-	0
chr14	6599763	6599837	-	6.53201	chr14:6599763:6599837:-_P1	LOC679894	12622	chr14	6600145	6600146	-	308
chr14	10772035	10772121	+	2.23331	chr14:10772035:10772121:+_P1	Lin54	14276	chr14	10772069	10772070	+	0
chr14	14222266	14222487	-	13.5454	chr14:14222266:14222487:-_P1	Bmp2k	30218	chr14	14222287	14222288	-	0
chr14	17437163	17437286	+	24.8966	chr14:17437163:17437286:+_P1	G3bp2	54793	chr14	17437108	17437109	+	54
chr14	18210746	18210807	+	0.738839	chr14:18210746:18210807:+_P1	Btc	21051	chr14	18210808	18210809	+	1
chr14	21144696	21144875	-	14.5417	chr14:21144696:21144875:-_P1	Utp3	10775	chr14	21144798	21144799	-	0
chr14	21155865	21155943	+	0.985119	chr14:21155865:21155943:+_P1	Jchain	21292	chr14	21155857	21155858	+	7
chr14	37432950	37433011	+	1.15863	chr14:37432950:37433011:+_P1	Ociad2	2641	chr14	37432980	37432981	+	0
chr14	41972386	41972553	+	7.74661	chr14:41972386:41972553:+_P1	AABR07014974.1	34757	chr14	41972068	41972069	+	317
chr14	44184209	44184253	+	6.03945	chr14:44184209:44184253:+_P1	Pds5a	1191	chr14	44184471	44184472	+	218
chr14	44867079	44867150	-	3.43672	chr14:44867079:44867150:-_P1	Klhl5	21861	chr14	44867196	44867197	-	46
chr14	45012169	45012304	-	15.3925	chr14:45012169:45012304:-_P1	Fam114a1	9450	chr14	45012267	45012268	-	0
chr14	45166875	45166913	-	0.694061	chr14:45166875:45166913:-_P1	Klf3	1668	chr14	45167359	45167360	-	446
chr14	45173677	45174073	-	44.8397	chr14:45173677:45174073:-_P1	Klf3	8470	chr14	45173885	45173886	-	0
chr14	45399135	45399184	-	0.660477	chr14:45399135:45399184:-_P1	AABR07015015.2	23008	chr14	45399248	45399249	-	64
chr14	46134755	46134856	-	3.54307	chr14:46134755:46134856:-_P1	Nwd2	18354	chr14	46134827	46134828	-	0
chr14	46633975	46634000	+	0.794812	chr14:46633975:46634000:+_P1	AABR07015078.1	15969	chr14	46633620	46633621	+	354
chr14	46646641	46646669	+	0.951535	chr14:46646641:46646669:+_P1	AABR07015078.1	3300	chr14	46646165	46646166	+	475
chr14	55083681	55083769	-	1.6344	chr14:55083681:55083769:-_P1	Pcdh7	2130	chr14	55084033	55084034	-	264
chr14	59865361	59865454	-	1.29297	chr14:59865361:59865454:-_P1	LOC100361259	115130	chr14	59865414	59865415	-	0
chr14	69765381	69765453	+	9.91276	chr14:69765381:69765453:+_P1	Lcorl	34701	chr14	69765354	69765355	+	26
chr14	80025218	80025239	-	1.66798	chr14:80025218:80025239:-_P1	Afap1	37108	chr14	80025342	80025343	-	103
chr14	80034976	80035162	-	21.4151	chr14:80034976:80035162:-_P1	Afap1	46866	chr14	80035163	80035164	-	1
chr14	80184805	80184909	+	4.14757	chr14:80184805:80184909:+_P1	Sh3tc1	10804	chr14	80184838	80184839	+	0
chr14	81069413	81069475	-	3.79495	chr14:81069413:81069475:-_P1	Rgs12	15507	chr14	81069727	81069728	-	252
chr14	83744540	83744579	+	5.00395	chr14:83744540:83744579:+_P1	Selenom	7812	chr14	83744562	83744563	+	0
chr14	83744746	83744963	+	3.28559	chr14:83744746:83744963:+_P1	Selenom	7428	chr14	83744562	83744563	+	183
chr14	84873438	84873550	+	15.7955	chr14:84873438:84873550:+_P1	Ascc2	3229	chr14	84873488	84873489	+	0
chr14	84938019	84938123	+	14.5249	chr14:84938019:84938123:+_P1	Zmat5	15661	chr14	84938105	84938106	+	0
chr14	85138226	85138309	+	33.0351	chr14:85138226:85138309:+_P1	Thoc5	3968	chr14	85138267	85138268	+	0
chr14	85400354	85400412	-	2.0542	chr14:85400354:85400412:-_P1	Emid1	1822	chr14	85400372	85400373	-	0
chr14	88907327	88907377	-	0.811603	chr14:88907327:88907377:-_P1	Tns3	21129	chr14	88907376	88907377	-	0
chr14	88907778	88907889	-	2.44041	chr14:88907778:88907889:-_P1	Tns3	21580	chr14	88907855	88907856	-	0
chr14	92990387	92990577	-	12.5099	chr14:92990387:92990577:-_P1	LOC100361025	51603	chr14	92990585	92990586	-	8
chr14	102301859	102301891	-	4.7017	chr14:102301859:102301891:-_P1	Etaa1	8182	chr14	102301871	102301872	-	0
chr14	104975723	104975885	-	21.0961	chr14:104975723:104975885:-_P1	Aftph	15582	chr14	104975774	104975775	-	0
chr14	108376594	108376729	-	15.594	chr14:108376594:108376729:-_P1	RGD1305110	4437	chr14	108376718	108376719	-	0
chr14	108517126	108517243	-	5.70921	chr14:108517126:108517243:-_P1	Rel	7234	chr14	108517488	108517489	-	245
chr14	114699824	114699923	-	2.13256	chr14:114699824:114699923:-_P1	Sptbn1	7060	chr14	114700239	114700240	-	316
chr14	114700027	114700334	-	240.923	chr14:114700027:114700334:-_P1	Sptbn1	7263	chr14	114700239	114700240	-	0
chr14	115352701	115352827	+	8.75972	chr14:115352701:115352827:+_P1	Asb3	38780	chr14	115352777	115352778	+	0
chr15	7402248	7402254	+	2.8602	chr15:7402248:7402254:+_P1	AABR07017046.1	469241	chr15	7402248	7402249	+	0
chr15	8188552	8188667	-	8.73733	chr15:8188552:8188667:-_P1	Nkiras1	4870	chr15	8188632	8188633	-	0
chr15	9116047	9116106	-	0.861979	chr15:9116047:9116106:-_P1	Thrb	29765	chr15	9116604	9116605	-	498
chr15	14885754	14885855	-	1.86389	chr15:14885754:14885855:-_P1	Synpr	148050	chr15	14885798	14885799	-	0
chr15	18449303	18449387	+	12.37	chr15:18449303:18449387:+_P1	Acox2	1755	chr15	18449305	18449306	+	0
chr15	18635879	18636173	-	29.4584	chr15:18635879:18636173:-_P1	Rpp14	3343	chr15	18636151	18636152	-	0
chr15	18938837	18938886	+	1.11945	chr15:18938837:18938886:+_P1	AABR07017236.2	2543	chr15	18938874	18938875	+	0
chr15	19547236	19547346	-	10.8419	chr15:19547236:19547346:-_P1	Txndc16	5421	chr15	19547287	19547288	-	0
chr15	23610797	23610979	-	37.9439	chr15:23610797:23610979:-_P1	Gmfb	4163	chr15	23610953	23610954	-	0
chr15	28411175	28411307	-	2.10457	chr15:28411175:28411307:-_P1	Zfp219	5129	chr15	28411288	28411289	-	0
chr15	28416888	28416996	-	2.74826	chr15:28416888:28416996:-_P1	Zfp219	10842	chr15	28416977	28416978	-	0
chr15	32888228	32888293	+	1.17543	chr15:32888228:32888293:+_P1	Abhd4	6643	chr15	32888221	32888222	+	6
chr15	33056104	33056154	-	1.28177	chr15:33056104:33056154:-_P1	Slc7a7	4975	chr15	33056131	33056132	-	0
chr15	33668064	33668229	+	1.90307	chr15:33668064:33668229:+_P1	Ngdn	9366	chr15	33668064	33668065	+	0
chr15	36805586	36805629	-	0.957132	chr15:36805586:36805629:-_P1	Cenpj	6772	chr15	36806025	36806026	-	396
chr15	36809156	36809227	-	2.32286	chr15:36809156:36809227:-_P1	Cenpj	10342	chr15	36809213	36809214	-	0
chr15	37156186	37156562	+	24.2977	chr15:37156186:37156562:+_P1	Zmym2	14488	chr15	37156490	37156491	+	0
chr15	37995140	37995289	-	24.4153	chr15:37995140:37995289:-_P1	Lats2	11258	chr15	37995186	37995187	-	0
chr15	39745152	39745245	+	28.5405	chr15:39745152:39745245:+_P1	Cab39l	14010	chr15	39745167	39745168	+	0
chr15	43297070	43297204	+	49.6086	chr15:43297070:43297204:+_P1	Adra1a	1588	chr15	43297091	43297092	+	0
chr15	43297320	43297439	+	2.78184	chr15:43297320:43297439:+_P1	Adra1a	1353	chr15	43297091	43297092	+	228
chr15	46458426	46458568	-	4.53938	chr15:46458426:46458568:-_P1	Gata4	25461	chr15	46458676	46458677	-	108
chr15	48326887	48327206	-	23.3798	chr15:48326887:48327206:-_P1	Hmbox1	42339	chr15	48327163	48327164	-	0
chr15	57176240	57176346	+	3.64382	chr15:57176240:57176346:+_P1	Lcp1	44944	chr15	57176111	57176112	+	128
chr15	58008614	58008672	+	0.755631	chr15:58008614:58008672:+_P1	Kctd4	7564	chr15	58008542	58008543	+	71
chr15	61772116	61772192	+	6.40887	chr15:61772116:61772192:+_P1	Kbtbd6	40381	chr15	61772558	61772559	+	366
chr15	61772529	61772598	+	1.50566	chr15:61772529:61772598:+_P1	Kbtbd6	40794	chr15	61772558	61772559	+	0
chr15	61803594	61803682	+	1.06908	chr15:61803594:61803682:+_P1	Elf1	23027	chr15	61803631	61803632	+	0
chr15	61810616	61810648	+	0.65488	chr15:61810616:61810648:+_P1	Elf1	16061	chr15	61810647	61810648	+	0
chr15	67553566	67553638	+	24.572	chr15:67553566:67553638:+_P1	Pcdh17	2195	chr15	67553601	67553602	+	0
chr15	83494251	83494361	+	9.14593	chr15:83494251:83494361:+_P1	Pibf1	1014	chr15	83494268	83494269	+	0
chr15	106376486	106376639	+	6.92382	chr15:106376486:106376639:+_P1	Farp1	57536	chr15	106376567	106376568	+	0
chr15	106376760	106376855	+	6.20177	chr15:106376760:106376855:+_P1	Farp1	57320	chr15	106376567	106376568	+	192
chr15	109331194	109331252	-	1.61761	chr15:109331194:109331252:-_P1	Ggact	14241	chr15	109331477	109331478	-	225
chr15	109331417	109331509	-	7.86975	chr15:109331417:109331509:-_P1	Ggact	14464	chr15	109331477	109331478	-	0
chr16	4468077	4468126	+	1.86389	chr16:4468077:4468126:+_P1	Wnt5a	1340	chr16	4468040	4468041	+	36
chr16	7952069	7952383	-	5.83795	chr16:7952069:7952383:-_P1	Ankrd28	23551	chr16	7952178	7952179	-	0
chr16	10942953	10943116	-	44.683	chr16:10942953:10943116:-_P1	Ldb3	1452	chr16	10943062	10943063	-	0
chr16	19560031	19560115	-	2.03181	chr16:19560031:19560115:-_P1	Zfp617	15304	chr16	19560092	19560093	-	0
chr16	19877859	19878003	+	121.998	chr16:19877859:19878003:+_P1	Dda1	3117	chr16	19877843	19877844	+	15
chr16	20335004	20335067	+	1.81351	chr16:20335004:20335067:+_P1	Kcnn1	1569	chr16	20335011	20335012	+	0
chr16	20563730	20563785	-	3.26321	chr16:20563730:20563785:-_P1	Lrrc25	1331	chr16	20564031	20564032	-	246
chr16	20652721	20652740	+	0.833992	chr16:20652721:20652740:+_P1	Kxd1	4357	chr16	20653006	20653007	+	266
chr16	20996284	20996334	-	8.96682	chr16:20996284:20996334:-_P1	Tmem161a	1905	chr16	20996611	20996612	-	277
chr16	21392641	21392708	+	6.66634	chr16:21392641:21392708:+_P1	LOC108348302	6843	chr16	21392666	21392667	+	0
chr16	23383539	23383705	+	3.34157	chr16:23383539:23383705:+_P1	Psd3	63659	chr16	23383615	23383616	+	0
chr16	27473738	27473858	-	7.79699	chr16:27473738:27473858:-_P1	AABR07025074.1	1051	chr16	27473727	27473728	-	10
chr16	32776949	32777104	-	6.3417	chr16:32776949:32777104:-_P1	Mfap3l	23671	chr16	32777055	32777056	-	0
chr16	46595190	46595308	+	3.61583	chr16:46595190:46595308:+_P1	Tenm3	136093	chr16	46595189	46595190	+	0
chr16	47994527	47994596	+	0.694061	chr16:47994527:47994596:+_P1	Trappc11	119436	chr16	47994611	47994612	+	15
chr16	71582605	71582675	+	3.45351	chr16:71582605:71582675:+_P1	Tacc1	46848	chr16	71582478	71582479	+	126
chr16	71596923	71597071	+	17.9224	chr16:71596923:71597071:+_P1	Tacc1	32452	chr16	71596937	71596938	+	0
chr16	74075241	74075323	+	4.95918	chr16:74075241:74075323:+_P1	Ap3m2	1487	chr16	74075263	74075264	+	0
chr16	74506467	74506638	+	11.2001	chr16:74506467:74506638:+_P1	Slc25a15	24924	chr16	74506466	74506467	+	0
chr16	74781369	74781413	+	2.44041	chr16:74781369:74781413:+_P1	Nek3	3866	chr16	74781389	74781390	+	0
chr16	79672802	79672932	-	16.3104	chr16:79672802:79672932:-_P1	Myom2	1083	chr16	79673214	79673215	-	282
chr16	79715607	79715643	-	0.542935	chr16:79715607:79715643:-_P1	Kbtbd11	14615	chr16	79715794	79715795	-	151
chr16	80806657	80806761	-	8.1944	chr16:80806657:80806761:-_P1	Fbxo25	8616	chr16	80806729	80806730	-	0
chr16	81182432	81182591	+	7.1533	chr16:81182432:81182591:+_P1	Tmem255b	6480	chr16	81182500	81182501	+	0
chr16	83482269	83482351	-	2.22771	chr16:83482269:83482351:-_P1	Col4a2	43708	chr16	83482358	83482359	-	7
chr16	84962846	84962918	-	1.37133	chr16:84962846:84962918:-_P1	Myo16	23523	chr16	84963142	84963143	-	224
chr16	84963127	84963169	-	0.643685	chr16:84963127:84963169:-_P1	Myo16	23804	chr16	84963142	84963143	-	0
chr17	5373069	5373199	+	43.9665	chr17:5373069:5373199:+_P1	Golm1	8833	chr17	5373114	5373115	+	0
chr17	5498342	5498356	+	1.77433	chr17:5498342:5498356:+_P1	Agtpbp1	13027	chr17	5498489	5498490	+	133
chr17	5498588	5498791	+	1.6288	chr17:5498588:5498791:+_P1	Agtpbp1	12592	chr17	5498489	5498490	+	98
chr17	6924413	6924508	+	1.93106	chr17:6924413:6924508:+_P1	AABR07026957.1	11350	chr17	6924385	6924386	+	27
chr17	6924645	6924761	+	1.80792	chr17:6924645:6924761:+_P1	AABR07026957.1	11097	chr17	6924385	6924386	+	259
chr17	8336852	8337013	-	30.27	chr17:8336852:8337013:-_P1	Smad5	5820	chr17	8336985	8336986	-	0
chr17	9463829	9464090	-	90.0208	chr17:9463829:9464090:-_P1	RGD1566359	5541	chr17	9464089	9464090	-	0
chr17	9954175	9954423	-	7.37719	chr17:9954175:9954423:-_P1	Nsd1	1277	chr17	9954164	9954165	-	10
chr17	9955323	9955417	-	2.16614	chr17:9955323:9955417:-_P1	Nsd1	2425	chr17	9955590	9955591	-	173
chr17	10828523	10828816	-	7.10853	chr17:10828523:10828816:-_P1	Cplx2	9688	chr17	10828822	10828823	-	6
chr17	13478268	13478269	+	0.794812	chr17:13478268:13478269:+_P1	Sema4d	38185	chr17	13478271	13478272	+	2
chr17	21591339	21591398	+	0.727644	chr17:21591339:21591398:+_P1	C17h6orf52	9032	chr17	21591287	21591288	+	51
chr17	29936538	29936666	-	1.93106	chr17:29936538:29936666:-_P1	Cdyl	41152	chr17	29936617	29936618	-	0
chr17	32787852	32787868	-	1.11945	chr17:32787852:32787868:-_P1	Serpinb6b	4425	chr17	32788049	32788050	-	181
chr17	32903055	32903058	+	0.755631	chr17:32903055:32903058:+_P1	Serpinb1a	1059	chr17	32902881	32902882	+	173
chr17	44645081	44645157	-	1.11945	chr17:44645081:44645157:-_P1	Zfp184	1719	chr17	44644654	44644655	-	426
chr17	46888405	46888647	-	18.3926	chr17:46888405:46888647:-_P1	Elmo1	93560	chr17	46888618	46888619	-	0
chr17	49676051	49676463	+	45.7073	chr17:49676051:49676463:+_P1	Rala	37829	chr17	49676389	49676390	+	0
chr17	53955803	53955887	-	5.78757	chr17:53955803:53955887:-_P1	LOC100912163	40727	chr17	53955850	53955851	-	0
chr17	57021761	57022059	+	10.4221	chr17:57021761:57022059:+_P1	Crem	9705	chr17	57021636	57021637	+	124
chr17	63235945	63236097	+	55.2562	chr17:63235945:63236097:+_P1	Larp4b	29308	chr17	63236022	63236023	+	0
chr17	63426315	63426575	+	54.327	chr17:63426315:63426575:+_P1	Larp4b	160871	chr17	63426171	63426172	+	143
chr17	63913777	63913913	-	23.335	chr17:63913777:63913913:-_P1	Zmynd11	34606	chr17	63914037	63914038	-	124
chr17	63914279	63914737	-	15.0566	chr17:63914279:63914737:-_P1	Zmynd11	35108	chr17	63914853	63914854	-	116
chr17	68574411	68574487	-	20.1781	chr17:68574411:68574487:-_P1	Pfkp	14940	chr17	68574568	68574569	-	81
chr17	75061978	75062180	+	14.6145	chr17:75061978:75062180:+_P1	AABR07028568.1	128601	chr17	75062030	75062031	+	0
chr17	79129871	79129980	-	1.78553	chr17:79129871:79129980:-_P1	Fam171a1	44795	chr17	79129924	79129925	-	0
chr17	79149417	79149512	-	7.27644	chr17:79149417:79149512:-_P1	Fam171a1	64341	chr17	79149509	79149510	-	0
chr17	79149635	79149728	-	13.4278	chr17:79149635:79149728:-_P1	Fam171a1	64559	chr17	79149509	79149510	-	125
chr17	84643590	84643697	+	9.72805	chr17:84643590:84643697:+_P1	Mllt10	237715	chr17	84643638	84643639	+	0
chr17	85360777	85360828	+	3.26321	chr17:85360777:85360828:+_P1	Bmi1	3653	chr17	85361263	85361264	+	435
chr17	87850531	87850617	-	0.83959	chr17:87850531:87850617:-_P1	Arhgap21	24110	chr17	87850649	87850650	-	32
chr17	87850858	87850940	-	2.43481	chr17:87850858:87850940:-_P1	Arhgap21	24437	chr17	87850649	87850650	-	208
chr17	90524608	90524609	-	1.04109	chr17:90524608:90524609:-_P1	AABR07028902.1	2517	chr17	90524608	90524609	-	0
chr18	746963	747039	+	1.97583	chr18:746963:747039:+_P1	Zfp136	3735	chr18	746883	746884	+	79
chr18	14409474	14409958	+	46.1942	chr18:14409474:14409958:+_P1	Dtna	61253	chr18	14409764	14409765	+	0
chr18	15542152	15542264	-	21.6838	chr18:15542152:15542264:-_P1	Ttr	1975	chr18	15542314	15542315	-	50
chr18	15559627	15559798	-	1.44969	chr18:15559627:15559798:-_P1	Ttr	19450	chr18	15560115	15560116	-	317
chr18	17397174	17397218	+	8.23358	chr18:17397174:17397218:+_P1	RGD1562608	6187	chr18	17397134	17397135	+	39
chr18	26212711	26212802	-	64.7268	chr18:26212711:26212802:-_P1	Nrep	1266	chr18	26212801	26212802	-	0
chr18	26213342	26213646	-	14.5473	chr18:26213342:26213646:-_P1	Nrep	1897	chr18	26213800	26213801	-	154
chr18	27011717	27011881	+	17.3739	chr18:27011717:27011881:+_P1	Apc	35499	chr18	27011574	27011575	+	142
chr18	27012024	27012062	+	0.587713	chr18:27012024:27012062:+_P1	Apc	35318	chr18	27011574	27011575	+	449
chr18	28355877	28355885	+	0.492559	chr18:28355877:28355885:+_P1	Matr3	5396	chr18	28355417	28355418	+	459
chr18	28397292	28397441	+	152.162	chr18:28397292:28397441:+_P1	Paip2	12512	chr18	28397328	28397329	+	0
chr18	28626098	28626099	+	0.800409	chr18:28626098:28626099:+_P1	Cxxc5	27491	chr18	28626368	28626369	+	269
chr18	28626365	28626464	+	11.7039	chr18:28626365:28626464:+_P1	Cxxc5	27126	chr18	28626368	28626369	+	0
chr18	31137931	31138038	-	13.5062	chr18:31137931:31138038:-_P1	Arap3	1731	chr18	31137464	31137465	-	466
chr18	31352233	31352340	-	10.8139	chr18:31352233:31352340:-_P1	Pcdh1	8436	chr18	31352277	31352278	-	0
chr18	32672853	32673379	-	30.1749	chr18:32672853:32673379:-_P1	AABR07031756.2	2188	chr18	32673595	32673596	-	216
chr18	32673962	32674100	-	9.50415	chr18:32673962:32674100:-_P1	AABR07031756.2	3297	chr18	32674029	32674030	-	0
chr18	32674412	32674439	-	0.957132	chr18:32674412:32674439:-_P1	AABR07031756.2	3747	chr18	32674029	32674030	-	382
chr18	41451319	41451590	-	27.2531	chr18:41451319:41451590:-_P1	Sema6a	61809	chr18	41451764	41451765	-	174
chr18	44664270	44664419	+	9.19631	chr18:44664270:44664419:+_P1	Tnfaip8	51805	chr18	44664035	44664036	+	234
chr18	44704907	44705050	+	9.71125	chr18:44704907:44705050:+_P1	Tnfaip8	11174	chr18	44704734	44704735	+	172
chr18	45946050	45946144	+	1.86389	chr18:45946050:45946144:+_P1	AABR07032097.1	202703	chr18	45946096	45946097	+	0
chr18	49939816	49939941	-	9.16832	chr18:49939816:49939941:-_P1	Zfp608	2294	chr18	49939894	49939895	-	0
chr18	52049691	52049752	-	25.322	chr18:52049691:52049752:-_P1	LOC100174910	1875	chr18	52049722	52049723	-	0
chr18	55498272	55498385	+	13.8364	chr18:55498272:55498385:+_P1	RGD1309362	7606	chr18	55498275	55498276	+	0
chr18	55657632	55657682	+	0.856381	chr18:55657632:55657682:+_P1	RGD1305184	8343	chr18	55657521	55657522	+	110
chr18	56013867	56014227	-	12.633	chr18:56013867:56014227:-_P1	Ndst1	20982	chr18	56014198	56014199	-	0
chr18	56042474	56042568	+	109.83	chr18:56042474:56042568:+_P1	Rps14	1799	chr18	56042285	56042286	+	188
chr18	57874318	57874429	-	15.5828	chr18:57874318:57874429:-_P1	Fbxo38	7577	chr18	57874428	57874429	-	0
chr18	60152902	60153465	-	18.7061	chr18:60152902:60153465:-_P1	Atp8b1	57548	chr18	60153464	60153465	-	0
chr18	60391114	60391278	+	7.1589	chr18:60391114:60391278:+_P1	Nedd4l	1096	chr18	60391227	60391228	+	0
chr18	61071504	61071983	-	84.0485	chr18:61071504:61071983:-_P1	Alpk2	14139	chr18	61071841	61071842	-	0
chr18	72691450	72691500	+	0.722047	chr18:72691450:72691500:+_P1	Smad2	120123	chr18	72691519	72691520	+	19
chr18	79769503	79769631	+	1.90867	chr18:79769503:79769631:+_P1	Zfp516	3975	chr18	79769558	79769559	+	0
chr18	81512916	81512954	-	0.867576	chr18:81512916:81512954:-_P1	Cndp1	13865	chr18	81512930	81512931	-	0
chr18	87628617	87628691	+	2.94416	chr18:87628617:87628691:+_P1	AABR07032904.1	8915	chr18	87628646	87628647	+	0
chr19	297435	297473	+	0.850784	chr19:297435:297473:+_P1	AABR07042609.1	21904	chr19	297447	297448	+	0
chr19	994236	994513	-	4.97597	chr19:994236:994513:-_P1	Bean1	10680	chr19	994760	994761	-	247
chr19	10898461	10898571	-	6.30252	chr19:10898461:10898571:-_P1	Cpne2	14414	chr19	10898763	10898764	-	192
chr19	11057450	11057501	+	1.237	chr19:11057450:11057501:+_P1	Fam192a	230079	chr19	11057491	11057492	+	0
chr19	15842042	15842182	-	4.36027	chr19:15842042:15842182:-_P1	Irx3	1052	chr19	15842138	15842139	-	0
chr19	19834744	19834857	-	12.4763	chr19:19834744:19834857:-_P1	Tent4b	1932	chr19	19835333	19835334	-	476
chr19	32294095	32294168	+	19.9319	chr19:32294095:32294168:+_P1	Mmaa	14066	chr19	32294113	32294114	+	0
chr19	32562432	32562582	-	2.16054	chr19:32562432:32562582:-_P1	Zfp827	33467	chr19	32563037	32563038	-	455
chr19	32562714	32563111	-	21.2752	chr19:32562714:32563111:-_P1	Zfp827	33749	chr19	32563037	32563038	-	0
chr19	33081424	33081507	+	31.1264	chr19:33081424:33081507:+_P1	Rbmxl1	1903	chr19	33081403	33081404	+	20
chr19	34758325	34758472	-	11.3345	chr19:34758325:34758472:-_P1	Nr3c2	5630	chr19	34758430	34758431	-	0
chr19	34760937	34761033	-	1.10266	chr19:34760937:34761033:-_P1	Nr3c2	8242	chr19	34761400	34761401	-	367
chr19	34761566	34761621	-	0.576518	chr19:34761566:34761621:-_P1	Nr3c2	8871	chr19	34761400	34761401	-	165
chr19	38153126	38153214	+	8.72054	chr19:38153126:38153214:+_P1	Slc7a6	9299	chr19	38153145	38153146	+	0
chr19	41578504	41578556	-	3.0729	chr19:41578504:41578556:-_P1	Zfp612	11491	chr19	41578535	41578536	-	0
chr19	41928257	41928363	+	23.5421	chr19:41928257:41928363:+_P1	LOC103694328	3856	chr19	41928359	41928360	+	0
chr19	42110136	42110286	-	8.06006	chr19:42110136:42110286:-_P1	Txnl4b	2535	chr19	42110274	42110275	-	0
chr19	43853365	43853499	+	4.5058	chr19:43853365:43853499:+_P1	Zfp1	28748	chr19	43853318	43853319	+	46
chr19	43967361	43967479	-	23.4022	chr19:43967361:43967479:-_P1	Bcar1	11578	chr19	43967407	43967408	-	0
chr19	49457326	49457444	-	72.5349	chr19:49457326:49457444:-_P1	Cmc2	9254	chr19	49457244	49457245	-	81
chr19	49457624	49457672	-	0.537337	chr19:49457624:49457672:-_P1	Cmc2	9552	chr19	49457244	49457245	-	379
chr19	50039400	50039464	+	2.41242	chr19:50039400:50039464:+_P1	Plcg2	5554	chr19	50039472	50039473	+	8
chr19	52225411	52225517	-	20.3069	chr19:52225411:52225517:-_P1	Hsdl1	7683	chr19	52225475	52225476	-	0
chr19	52429306	52429390	-	3.26321	chr19:52429306:52429390:-_P1	Meak7	4988	chr19	52429358	52429359	-	0
chr19	53036502	53036575	-	4.99276	chr19:53036502:53036575:-_P1	Mthfsd	1768	chr19	53036544	53036545	-	0
chr19	56238411	56238492	+	10.1814	chr19:56238411:56238492:+_P1	Def8	4914	chr19	56238431	56238432	+	0
chr19	57003384	57003552	+	11.3121	chr19:57003384:57003552:+_P1	Galnt2	44276	chr19	57003501	57003502	+	0
chr19	57020630	57020807	+	4.03563	chr19:57020630:57020807:+_P1	Galnt2	27021	chr19	57020670	57020671	+	0
chr2	2783888	2783961	-	1.37133	chr2:2783888:2783961:-_P1	Rfesd	4779	chr2	2784418	2784419	-	457
chr2	2784180	2784386	-	21.7062	chr2:2784180:2784386:-_P1	Rfesd	5071	chr2	2784418	2784419	-	32
chr2	2890876	2890928	+	0.705255	chr2:2890876:2890928:+_P1	Ttc37	12562	chr2	2891266	2891267	+	338
chr2	2891302	2891404	+	15.0343	chr2:2891302:2891404:+_P1	Ttc37	12086	chr2	2891266	2891267	+	35
chr2	12252539	12252673	+	13.4726	chr2:12252539:12252673:+_P1	LOC100912538	149941	chr2	12252596	12252597	+	0
chr2	18927511	18927642	+	48.3995	chr2:18927511:18927642:+_P1	Tmem167a	9814	chr2	18927526	18927527	+	0
chr2	20416883	20416934	+	0.621296	chr2:20416883:20416934:+_P1	Ssbp2	14307	chr2	20416619	20416620	+	263
chr2	21452787	21452955	-	2045.9	chr2:21452787:21452955:-_P1	Ckmt2	15594	chr2	21452926	21452927	-	0
chr2	23705479	23705656	+	2.59713	chr2:23705479:23705656:+_P1	Lhfpl2	65063	chr2	23705523	23705524	+	0
chr2	23710008	23710119	+	4.9144	chr2:23710008:23710119:+_P1	Lhfpl2	60600	chr2	23709833	23709834	+	174
chr2	30679667	30679776	+	4.9032	chr2:30679667:30679776:+_P1	Ccdc125	6062	chr2	30679350	30679351	+	316
chr2	30750562	30750760	-	118.875	chr2:30750562:30750760:-_P1	Mrps36	2134	chr2	30750966	30750967	-	206
chr2	30750917	30750996	-	2.14935	chr2:30750917:30750996:-_P1	Mrps36	2489	chr2	30750966	30750967	-	0
chr2	33217252	33217347	-	4.82484	chr2:33217252:33217347:-_P1	NEWGENE_1310139	191981	chr2	33217368	33217369	-	21
chr2	35890671	35890713	-	0.643685	chr2:35890671:35890713:-_P1	Rnf180	20093	chr2	35890790	35890791	-	77
chr2	38120281	38120451	-	21.5495	chr2:38120281:38120451:-_P1	Ipo11	9714	chr2	38120431	38120432	-	0
chr2	39579733	39579815	+	2.50198	chr2:39579733:39579815:+_P1	Ercc8	145076	chr2	39579615	39579616	+	117
chr2	43069874	43070277	-	51.3661	chr2:43069874:43070277:-_P1	Gpbp1	1197	chr2	43070339	43070340	-	62
chr2	44279180	44279359	+	106.214	chr2:44279180:44279359:+_P1	Il6st	10032	chr2	44279215	44279216	+	0
chr2	52427435	52427552	+	13.898	chr2:52427435:52427552:+_P1	Hmgcs1	4047	chr2	52427450	52427451	+	0
chr2	53105771	53106133	+	670.687	chr2:53105771:53106133:+_P1	Selenop	3549	chr2	53105808	53105809	+	0
chr2	53105771	53106133	+	670.687	chr2:53105771:53106133:+_P1	Selenop	3549	chr2	53106086	53106087	+	0
chr2	54460309	54460366	+	1.18662	chr2:54460309:54460366:+_P1	C6	5912	chr2	54460365	54460366	+	0
chr2	54781494	54781639	-	350.646	chr2:54781494:54781639:-_P1	C7	3765	chr2	54781615	54781616	-	0
chr2	54964459	54964498	-	8.3903	chr2:54964459:54964498:-_P1	Ptger4	1011	chr2	54964508	54964509	-	10
chr2	55716750	55716787	+	0.996313	chr2:55716750:55716787:+_P1	Dab2	30529	chr2	55716908	55716909	+	121
chr2	55716903	55717139	+	48.6402	chr2:55716903:55717139:+_P1	Dab2	30177	chr2	55716908	55716909	+	0
chr2	56162962	56163270	-	6.19617	chr2:56162962:56163270:-_P1	Osmr	11431	chr2	56163251	56163252	-	0
chr2	76694164	76694171	+	0.766825	chr2:76694164:76694171:+_P1	Sirpd	229418	chr2	76694155	76694156	+	8
chr2	80905339	80905432	+	5.7316	chr2:80905339:80905432:+_P1	Dnah5	43224	chr2	80905382	80905383	+	0
chr2	86559077	86559157	-	4.38826	chr2:86559077:86559157:-_P1	Zfp708	83981	chr2	86559126	86559127	-	0
chr2	86881085	86881165	+	1.71836	chr2:86881085:86881165:+_P1	AABR07009106.1	9925	chr2	86881102	86881103	+	0
chr2	86881307	86881358	+	6.15139	chr2:86881307:86881358:+_P1	AABR07009106.1	9732	chr2	86881102	86881103	+	204
chr2	104006601	104006673	+	40.7145	chr2:104006601:104006673:+_P1	Mtfr1	14280	chr2	104006626	104006627	+	0
chr2	107218600	107218848	+	12.5155	chr2:107218600:107218848:+_P1	Tbl1xr1	14204	chr2	107218633	107218634	+	0
chr2	107221189	107221245	+	2.78744	chr2:107221189:107221245:+_P1	Tbl1xr1	11807	chr2	107221225	107221226	+	0
chr2	107221351	107221465	+	9.49296	chr2:107221351:107221465:+_P1	Tbl1xr1	11587	chr2	107221225	107221226	+	125
chr2	107221582	107221660	+	1.237	chr2:107221582:107221660:+_P1	Tbl1xr1	11392	chr2	107221886	107221887	+	226
chr2	107221832	107221917	+	0.867576	chr2:107221832:107221917:+_P1	Tbl1xr1	11135	chr2	107221886	107221887	+	0
chr2	113414334	113414466	-	21.3256	chr2:113414334:113414466:-_P1	Fndc3b	68757	chr2	113414450	113414451	-	0
chr2	117457949	117458193	-	13.7973	chr2:117457949:117458193:-_P1	Mecom	3180	chr2	117458402	117458403	-	209
chr2	117958936	117958948	-	1.34334	chr2:117958936:117958948:-_P1	AABR07009931.1	292253	chr2	117958786	117958787	-	149
chr2	118279679	118279721	+	1.56723	chr2:118279679:118279721:+_P1	Kcnmb2	267106	chr2	118279513	118279514	+	165
chr2	118906503	118906529	+	2.49638	chr2:118906503:118906529:+_P1	Zfp639	4056	chr2	118906503	118906504	+	0
chr2	118927223	118927623	+	154.412	chr2:118927223:118927623:+_P1	Mfn1	2113	chr2	118927251	118927252	+	0
chr2	122855014	122855166	+	6.36969	chr2:122855014:122855166:+_P1	Zfp267	9932	chr2	122855051	122855052	+	0
chr2	124048545	124048623	+	4.18675	chr2:124048545:124048623:+_P1	Bbs12	5657	chr2	124048575	124048576	+	0
chr2	149482318	149482505	-	1.79112	chr2:149482318:149482505:-_P1	P2ry12	37770	chr2	149482394	149482395	-	0
chr2	150754730	150754994	+	6.63276	chr2:150754730:150754994:+_P1	Mbnl1	1189	chr2	150755331	150755332	+	337
chr2	183263281	183263941	-	12.3476	chr2:183263281:183263941:-_P1	AABR07012039.1	12353	chr2	183263652	183263653	-	0
chr2	188763874	188763994	+	92.4836	chr2:188763874:188763994:+_P1	Pbxip1	2539	chr2	188763871	188763872	+	2
chr2	189045544	189045860	+	18.846	chr2:189045544:189045860:+_P1	Adar	16581	chr2	189045360	189045361	+	183
chr2	189905217	189905382	-	85.9404	chr2:189905217:189905382:-_P1	S100a1	1998	chr2	189905302	189905303	-	0
chr2	192984284	192984318	-	0.861979	chr2:192984284:192984318:-_P1	AABR07012314.1	5818	chr2	192984297	192984298	-	0
chr2	193863165	193863276	+	131.944	chr2:193863165:193863276:+_P1	S100a11	3673	chr2	193863218	193863219	+	0
chr2	195612431	195612553	+	11.3457	chr2:195612431:195612553:+_P1	Rorc	4466	chr2	195612490	195612491	+	0
chr2	195981640	195981690	+	0.733242	chr2:195981640:195981690:+_P1	Pogz	14829	chr2	195981384	195981385	+	255
chr2	196330756	196330852	+	3.29119	chr2:196330756:196330852:+_P1	Sema6c	3772	chr2	196330782	196330783	+	0
chr2	196391634	196391748	-	3.24082	chr2:196391634:196391748:-_P1	Mllt11	10356	chr2	196391922	196391923	-	174
chr2	196391863	196391969	-	2.06539	chr2:196391863:196391969:-_P1	Mllt11	10135	chr2	196391922	196391923	-	0
chr2	197653006	197653124	+	7.00218	chr2:197653006:197653124:+_P1	Ctss	2660	chr2	197652999	197653000	+	6
chr2	199420240	199420302	-	0.710853	chr2:199420240:199420302:-_P1	LOC685963	59005	chr2	199420597	199420598	-	295
chr2	199771659	199771721	+	0.542935	chr2:199771659:199771721:+_P1	Fmo5	25158	chr2	199771908	199771909	+	187
chr2	200546968	200547020	+	0.789214	chr2:200546968:200547020:+_P1	LOC102550892	25480	chr2	200547005	200547006	+	0
chr2	208271842	208272018	-	84.8769	chr2:208271842:208272018:-_P1	AABR07012775.1	45954	chr2	208272016	208272017	-	0
chr2	224824042	224824163	-	4.16436	chr2:224824042:224824163:-_P1	Tmem56	21045	chr2	224824166	224824167	-	3
chr2	226899437	226899491	+	1.52805	chr2:226899437:226899491:+_P1	Pde5a	1126	chr2	226899480	226899481	+	0
chr2	231824378	231825104	-	39.7798	chr2:231824378:231825104:-_P1	Larp7	52201	chr2	231824749	231824750	-	0
chr2	235853857	235854066	-	594.306	chr2:235853857:235854066:-_P1	Rpl34	1149	chr2	235854043	235854044	-	0
chr2	240625950	240626028	-	4.62894	chr2:240625950:240626028:-_P1	Cisd2	14390	chr2	240626479	240626480	-	451
chr2	240626452	240626681	-	12.3532	chr2:240626452:240626681:-_P1	Cisd2	14892	chr2	240626479	240626480	-	0
chr2	240889894	240890407	-	23.7772	chr2:240889894:240890407:-_P1	Nfkb1	23205	chr2	240890862	240890863	-	455
chr2	247045844	247045878	+	2.95536	chr2:247045844:247045878:+_P1	Unc5c	202527	chr2	247045871	247045872	+	0
chr2	248215355	248215480	+	6.61597	chr2:248215355:248215480:+_P1	Gbp7	3946	chr2	248215290	248215291	+	64
chr2	248343312	248343422	+	31.6413	chr2:248343312:248343422:+_P1	AABR07013651.1	55493	chr2	248343249	248343250	+	62
chr2	248644406	248644622	+	24.6559	chr2:248644406:248644622:+_P1	Kyat3	4817	chr2	248644441	248644442	+	0
chr2	248709303	248709431	+	19.2266	chr2:248709303:248709431:+_P1	Gtf2b	5848	chr2	248709308	248709309	+	0
chr2	251176557	251176607	+	0.906757	chr2:251176557:251176607:+_P1	Col24a1	24077	chr2	251176576	251176577	+	0
chr2	256948723	256948795	+	3.19044	chr2:256948723:256948795:+_P1	Ifi44l	16063	chr2	256948737	256948738	+	0
chr2	257605332	257605377	+	5.36778	chr2:257605332:257605377:+_P1	Zzz3	21004	chr2	257605650	257605651	+	273
chr20	5932965	5933144	-	2.70348	chr20:5932965:5933144:-_P1	Slc26a8	1548	chr20	5933126	5933127	-	0
chr20	7133022	7133495	+	74.4268	chr20:7133022:7133495:+_P1	Hmga1	2510	chr20	7133038	7133039	+	0
chr20	8061739	8061856	-	9.52654	chr20:8061739:8061856:-_P1	Fkbp5	42719	chr20	8061802	8061803	-	0
chr20	9253848	9253997	-	10.0583	chr20:9253848:9253997:-_P1	Btbd9	4028	chr20	9253936	9253937	-	0
chr20	11060274	11060714	+	29.4136	chr20:11060274:11060714:+_P1	Agpat3	53448	chr20	11060068	11060069	+	205
chr20	11434064	11434114	+	0.587713	chr20:11434064:11434114:+_P1	Trpm2	2151	chr20	11434084	11434085	+	0
chr20	19948500	19948767	+	13.2263	chr20:19948500:19948767:+_P1	Ank3	156278	chr20	19948516	19948517	+	0
chr20	19948971	19949085	+	4.22593	chr20:19948971:19949085:+_P1	Ank3	155960	chr20	19948516	19948517	+	454
chr20	22913502	22913595	-	6.9518	chr20:22913502:22913595:-_P1	Jmjd1c	30830	chr20	22913557	22913558	-	0
chr20	22914021	22914292	-	22.8648	chr20:22914021:22914292:-_P1	Jmjd1c	31349	chr20	22914233	22914234	-	0
chr20	26619956	26620102	-	16.1873	chr20:26619956:26620102:-_P1	AABR07044914.1	30747	chr20	26620057	26620058	-	0
chr20	26640278	26640399	-	8.55262	chr20:26640278:26640399:-_P1	AABR07044914.1	51069	chr20	26640356	26640357	-	0
chr20	27895949	27896109	+	29.839	chr20:27895949:27896109:+_P1	Lims1	58322	chr20	27895940	27895941	+	8
chr20	31002850	31002851	-	1.97583	chr20:31002850:31002851:-_P1	Pald1	27378	chr20	31002850	31002851	-	0
chr20	31329054	31329131	+	8.47986	chr20:31329054:31329131:+_P1	Aifm2	10654	chr20	31329063	31329064	+	0
chr20	31979262	31979368	-	2.21092	chr20:31979262:31979368:-_P1	Hk1	22613	chr20	31979777	31979778	-	409
chr20	31979644	31980213	-	172.189	chr20:31979644:31980213:-_P1	Hk1	22995	chr20	31979777	31979778	-	0
chr20	32158011	32158076	-	0.889965	chr20:32158011:32158076:-_P1	Srgn	18222	chr20	32158049	32158050	-	0
chr20	38104021	38104111	+	1.58962	chr20:38104021:38104111:+_P1	Gja1	227371	chr20	38104047	38104048	+	0
chr20	45133666	45133704	-	1.30976	chr20:45133666:45133704:-_P1	RGD1310495	7604	chr20	45133864	45133865	-	160
chr20	54522930	54522972	-	0.638088	chr20:54522930:54522972:-_P1	Grik2	5221	chr20	54522905	54522906	-	24
chr3	7090077	7090145	+	0.794812	chr3:7090077:7090145:+_P1	Ralgds	19773	chr3	7090101	7090102	+	0
chr3	7090246	7090317	+	0.794812	chr3:7090246:7090317:+_P1	Ralgds	19601	chr3	7090101	7090102	+	144
chr3	7220168	7220218	+	14.2171	chr3:7220168:7220218:+_P1	Tsc1	16972	chr3	7220191	7220192	+	0
chr3	7682178	7682200	+	0.492559	chr3:7682178:7682200:+_P1	Setx	4301	chr3	7682178	7682179	+	0
chr3	7800387	7800594	-	6.36409	chr3:7800387:7800594:-_P1	Ntng2	4002	chr3	7800553	7800554	-	0
chr3	8169450	8169576	+	5.5245	chr3:8169450:8169576:+_P1	Rapgef1	22997	chr3	8169540	8169541	+	0
chr3	8785058	8785221	-	17.3907	chr3:8785058:8785221:-_P1	Kyat1	18625	chr3	8785489	8785490	-	268
chr3	11165695	11165739	+	3.59904	chr3:11165695:11165739:+_P1	Prrc2b	32660	chr3	11165695	11165696	+	0
chr3	11459868	11459936	-	0.878771	chr3:11459868:11459936:-_P1	Slc25a25	7339	chr3	11459948	11459949	-	12
chr3	11476130	11476198	-	4.55058	chr3:11476130:11476198:-_P1	Slc25a25	23601	chr3	11476185	11476186	-	0
chr3	11649101	11649102	+	2.08778	chr3:11649101:11649102:+_P1	AABR07051450.1	4425	chr3	11649055	11649056	+	45
chr3	12009454	12009514	-	3.66061	chr3:12009454:12009514:-_P1	Lrsam1	1884	chr3	12009108	12009109	-	345
chr3	12509257	12509392	-	14.8328	chr3:12509257:12509392:-_P1	Zbtb43	6398	chr3	12509334	12509335	-	0
chr3	14456082	14456171	+	8.89965	chr3:14456082:14456171:+_P1	Gsn	11157	chr3	14456106	14456107	+	0
chr3	21382792	21382886	-	1.44969	chr3:21382792:21382886:-_P1	Pdcl	226965	chr3	21382850	21382851	-	0
chr3	21957029	21957162	-	14.0156	chr3:21957029:21957162:-_P1	Strbp	52759	chr3	21957120	21957121	-	0
chr3	29802315	29802482	-	4.63453	chr3:29802315:29802482:-_P1	Gtdc1	96330	chr3	29802374	29802375	-	0
chr3	38400153	38400271	+	4.08041	chr3:38400153:38400271:+_P1	RGD1564306	32597	chr3	38400225	38400226	+	0
chr3	43128491	43128622	-	5.10471	chr3:43128491:43128622:-_P1	Nr4a2	9332	chr3	43128550	43128551	-	0
chr3	43223542	43223574	+	0.77802	chr3:43223542:43223574:+_P1	Gpd2	31991	chr3	43223869	43223870	+	295
chr3	43223846	43223958	+	16.2265	chr3:43223846:43223958:+_P1	Gpd2	31607	chr3	43223869	43223870	+	0
chr3	44551664	44552146	-	15.7283	chr3:44551664:44552146:-_P1	Acvr1	28734	chr3	44552108	44552109	-	0
chr3	45211731	45211826	+	6.18498	chr3:45211731:45211826:+_P1	Pkp4	65520	chr3	45211694	45211695	+	36
chr3	46197166	46197383	-	8.37351	chr3:46197166:46197383:-_P1	Baz2b	43795	chr3	46197844	46197845	-	461
chr3	52877188	52877366	-	13.5734	chr3:52877188:52877366:-_P1	Scn7a	27281	chr3	52877268	52877269	-	0
chr3	57997968	57998277	-	203.058	chr3:57997968:57998277:-_P1	AABR07052498.1	11235	chr3	57998225	57998226	-	0
chr3	59404081	59404265	-	16.1425	chr3:59404081:59404265:-_P1	AABR07052519.1	237725	chr3	59404582	59404583	-	317
chr3	59404441	59404498	-	1.05229	chr3:59404441:59404498:-_P1	AABR07052519.1	238085	chr3	59404582	59404583	-	84
chr3	60624515	60624650	-	6.22416	chr3:60624515:60624650:-_P1	Chn1	12591	chr3	60624627	60624628	-	0
chr3	63257593	63257768	+	18.6053	chr3:63257593:63257768:+_P1	Rbm45	36946	chr3	63257625	63257626	+	0
chr3	63846202	63846207	-	0.817201	chr3:63846202:63846207:-_P1	AABR07052585.1	10185	chr3	63846198	63846199	-	3
chr3	64134788	64135047	-	6.94061	chr3:64134788:64135047:-_P1	Sestd1	39668	chr3	64134964	64134965	-	0
chr3	67804494	67804922	-	20.2117	chr3:67804494:67804922:-_P1	Nckap1	16504	chr3	67804632	67804633	-	0
chr3	71895926	71896006	-	0.750033	chr3:71895926:71896006:-_P1	Tfpi	2308	chr3	71896290	71896291	-	284
chr3	71896357	71896491	-	62.3703	chr3:71896357:71896491:-_P1	Tfpi	2739	chr3	71896410	71896411	-	0
chr3	72458498	72458594	+	11.7095	chr3:72458498:72458594:+_P1	Tnks1bp1	2293	chr3	72458557	72458558	+	0
chr3	72458988	72459035	+	0.643685	chr3:72458988:72459035:+_P1	Tnks1bp1	1852	chr3	72458557	72458558	+	430
chr3	79768877	79769030	+	85.9796	chr3:79768877:79769030:+_P1	Kbtbd4	39138	chr3	79768799	79768800	+	77
chr3	80014045	80014215	-	6.5544	chr3:80014045:80014215:-_P1	Nr1h3	1295	chr3	80014621	80014622	-	406
chr3	80614543	80614618	-	41.9123	chr3:80614543:80614618:-_P1	Atg13	13133	chr3	80614763	80614764	-	145
chr3	81099799	81099874	+	1.46089	chr3:81099799:81099874:+_P1	Phf21a	34629	chr3	81099759	81099760	+	39
chr3	81942279	81942463	-	3.19604	chr3:81942279:81942463:-_P1	Prdm11	31082	chr3	81942402	81942403	-	0
chr3	94334414	94334594	-	1.76874	chr3:94334414:94334594:-_P1	Hipk3	84115	chr3	94334774	94334775	-	180
chr3	94334718	94334876	-	3.60464	chr3:94334718:94334876:-_P1	Hipk3	83833	chr3	94334774	94334775	-	0
chr3	95955109	95955222	+	47.4368	chr3:95955109:95955222:+_P1	Immp1l	4479	chr3	95955122	95955123	+	0
chr3	100366127	100366186	-	6.28013	chr3:100366127:100366186:-_P1	Mettl15	1727	chr3	100366433	100366434	-	247
chr3	104665091	104665217	-	4.62334	chr3:104665091:104665217:-_P1	AABR07053402.1	10238	chr3	104665219	104665220	-	2
chr3	105667163	105667246	-	16.1929	chr3:105667163:105667246:-_P1	Zfp770	3706	chr3	105666828	105666829	-	334
chr3	111670034	111670125	+	6.55999	chr3:111670034:111670125:+_P1	Mga	28894	chr3	111670081	111670082	+	0
chr3	111670319	111670401	+	2.68109	chr3:111670319:111670401:+_P1	Mga	28618	chr3	111670081	111670082	+	237
chr3	111693132	111693275	+	11.6423	chr3:111693132:111693275:+_P1	Mga	5744	chr3	111693181	111693182	+	0
chr3	111693496	111693548	+	0.699658	chr3:111693496:111693548:+_P1	Mga	5471	chr3	111693181	111693182	+	314
chr3	112333981	112334037	+	51.0526	chr3:112333981:112334037:+_P1	AABR07053516.1	12588	chr3	112333981	112333982	+	0
chr3	113131186	113131293	-	6.30812	chr3:113131186:113131293:-_P1	Zscan29	1015	chr3	113131269	113131270	-	0
chr3	113257941	113257976	-	1.25938	chr3:113257941:113257976:-_P1	Tp53bp1	26151	chr3	113258007	113258008	-	31
chr3	113445476	113445570	+	1.61761	chr3:113445476:113445570:+_P1	Wdr76	3305	chr3	113445511	113445512	+	0
chr3	113618538	113618584	-	0.973924	chr3:113618538:113618584:-_P1	Frmd5	92674	chr3	113618566	113618567	-	0
chr3	113906096	113906317	+	2.73706	chr3:113906096:113906317:+_P1	Ctdspl2	12310	chr3	113906110	113906111	+	0
chr3	113906543	113906710	+	21.7454	chr3:113906543:113906710:+_P1	Ctdspl2	11917	chr3	113906110	113906111	+	432
chr3	114894916	114895024	+	19.2322	chr3:114894916:114895024:+_P1	Sqor	5317	chr3	114894937	114894938	+	0
chr3	118427973	118428054	+	4.99276	chr3:118427973:118428054:+_P1	Dtwd1	2455	chr3	118427928	118427929	+	44
chr3	119346948	119347130	-	31.5406	chr3:119346948:119347130:-_P1	Trpm7	16603	chr3	119347074	119347075	-	0
chr3	119346948	119347130	-	31.5406	chr3:119346948:119347130:-_P1	Trpm7	16603	chr3	119347101	119347102	-	0
chr3	119552563	119552642	+	16.0194	chr3:119552563:119552642:+_P1	Blvra	8646	chr3	119552576	119552577	+	0
chr3	123184608	123184688	-	3.0785	chr3:123184608:123184688:-_P1	Lzts3	4964	chr3	123184625	123184626	-	0
chr3	124543280	124543289	+	2.92177	chr3:124543280:124543289:+_P1	Prnd	2073	chr3	124543281	124543282	+	0
chr3	125319236	125319296	+	4.04122	chr3:125319236:125319296:+_P1	Shld1	1382	chr3	125319165	125319166	+	70
chr3	138684368	138684574	-	5.79317	chr3:138684368:138684574:-_P1	Dzank1	1050	chr3	138684456	138684457	-	0
chr3	145663821	145663901	-	6.06184	chr3:145663821:145663901:-_P1	LOC102554315	22167	chr3	145663877	145663878	-	0
chr3	145834167	145834265	-	5.22225	chr3:145834167:145834265:-_P1	LOC102555217	23333	chr3	145834249	145834250	-	0
chr3	148940403	148940441	-	2.09338	chr3:148940403:148940441:-_P1	Nol4l	7525	chr3	148940440	148940441	-	0
chr3	150114838	150114894	+	5.323	chr3:150114838:150114894:+_P1	AABR07054367.1	20925	chr3	150114868	150114869	+	0
chr3	150663898	150663991	+	19.4001	chr3:150663898:150663991:+_P1	Itch	22645	chr3	150663938	150663939	+	0
chr3	152273254	152273409	+	14.1387	chr3:152273254:152273409:+_P1	Phf20	21245	chr3	152273322	152273323	+	0
chr3	154506885	154506936	-	13.6125	chr3:154506885:154506936:-_P1	Tti1	16034	chr3	154506895	154506896	-	0
chr3	154894075	154894235	+	23.2063	chr3:154894075:154894235:+_P1	Ralgapb	10904	chr3	154894036	154894037	+	38
chr3	156617974	156618099	-	4.85843	chr3:156617974:156618099:-_P1	Zhx3	159898	chr3	156618125	156618126	-	26
chr3	156635345	156635596	+	44.5318	chr3:156635345:156635596:+_P1	Top1	6866	chr3	156635356	156635357	+	0
chr3	159388829	159388904	+	23.5309	chr3:159388829:159388904:+_P1	Ift52	3287	chr3	159388856	159388857	+	0
chr3	162285254	162285422	+	2.2557	chr3:162285254:162285422:+_P1	Eya2	61066	chr3	162285344	162285345	+	0
chr3	163815706	163815770	+	2.27809	chr3:163815706:163815770:+_P1	Ddx27	48533	chr3	163815549	163815550	+	156
chr3	163817413	163817418	+	0.817201	chr3:163817413:163817418:+_P1	Ddx27	50240	chr3	163817251	163817252	+	161
chr3	166469552	166470105	+	34.4456	chr3:166469552:166470105:+_P1	Tshz2	273437	chr3	166469341	166469342	+	210
chr3	167004839	167004918	-	3.92368	chr3:167004839:167004918:-_P1	Zfp217	10553	chr3	167004859	167004860	-	0
chr3	167494385	167494465	+	0.884368	chr3:167494385:167494465:+_P1	AABR07054716.1	19292	chr3	167494408	167494409	+	0
chr3	170380221	170380287	-	2.11017	chr3:170380221:170380287:-_P1	Aurka	2011	chr3	170380215	170380216	-	5
chr3	176216807	176216840	-	5.60286	chr3:176216807:176216840:-_P1	Dido1	19054	chr3	176216801	176216802	-	5
chr4	3956898	3957043	+	6.16819	chr4:3956898:3957043:+_P1	Paxip1	2595	chr4	3957042	3957043	+	0
chr4	6981309	6981562	-	25.9545	chr4:6981309:6981562:-_P1	Nub1	3236	chr4	6981531	6981532	-	0
chr4	22517029	22517115	-	1.87508	chr4:22517029:22517115:-_P1	Abcb1a	91514	chr4	22517091	22517092	-	0
chr4	25681547	25681691	+	5.78757	chr4:25681547:25681691:+_P1	Cldn12	4699	chr4	25681583	25681584	+	0
chr4	28324492	28324610	-	4.64013	chr4:28324492:28324610:-_P1	Samd9	14314	chr4	28324560	28324561	-	0
chr4	29976489	29976585	+	2.10457	chr4:29976489:29976585:+_P1	Ppp1r9a	2152	chr4	29976548	29976549	+	0
chr4	31756859	31757086	-	61.3292	chr4:31756859:31757086:-_P1	Slc25a13	26473	chr4	31757010	31757011	-	0
chr4	38252031	38252085	-	0.464573	chr4:38252031:38252085:-_P1	Ndufa4	11183	chr4	38252061	38252062	-	0
chr4	56547611	56547709	+	5.21665	chr4:56547611:56547709:+_P1	Hilpda	2028	chr4	56547630	56547631	+	0
chr4	58008574	58008644	-	1.03549	chr4:58008574:58008644:-_P1	Cep41	1735	chr4	58008594	58008595	-	0
chr4	58507127	58507284	-	4.03563	chr4:58507127:58507284:-_P1	Klf14	256329	chr4	58507540	58507541	-	256
chr4	59883581	59883656	-	2.87699	chr4:59883581:59883656:-_P1	Plxna4	74260	chr4	59883601	59883602	-	0
chr4	62196552	62196576	+	0.968327	chr4:62196552:62196576:+_P1	Cald1	24158	chr4	62196474	62196475	+	77
chr4	67615960	67616070	-	73.7831	chr4:67615960:67616070:-_P1	Mrps33	5250	chr4	67616060	67616061	-	0
chr4	68634766	68634847	-	4.71849	chr4:68634766:68634847:-_P1	RGD1563986	37180	chr4	68634822	68634823	-	0
chr4	78077619	78077763	-	4.86402	chr4:78077619:78077763:-_P1	Zfp467	2221	chr4	78078157	78078158	-	394
chr4	78262440	78262487	+	0.475767	chr4:78262440:78262487:+_P1	AC099444.1	1377	chr4	78262394	78262395	+	45
chr4	81243499	81243762	-	736.885	chr4:81243499:81243762:-_P1	Hnrnpa2b1	2217	chr4	81243644	81243645	-	0
chr4	89766625	89766860	-	17.0269	chr4:89766625:89766860:-_P1	Gprin3	70697	chr4	89766874	89766875	-	14
chr4	97635339	97635615	+	77.315	chr4:97635339:97635615:+_P1	Gng12	22054	chr4	97635278	97635279	+	60
chr4	100242457	100242706	-	39.0913	chr4:100242457:100242706:-_P1	Vamp5	9898	chr4	100242758	100242759	-	52
chr4	100254942	100255190	-	48.741	chr4:100254942:100255190:-_P1	Vamp8	2187	chr4	100255588	100255589	-	398
chr4	100402325	100402370	+	2.74826	chr4:100402325:100402370:+_P1	Capg	5286	chr4	100402316	100402317	+	8
chr4	114863759	114863860	+	72.9044	chr4:114863759:114863860:+_P1	LOC500227	9301	chr4	114863593	114863594	+	165
chr4	115555144	115555243	+	4.17556	chr4:115555144:115555243:+_P1	Zfp638	46416	chr4	115555148	115555149	+	0
chr4	120567572	120567675	-	35.94	chr4:120567572:120567675:-_P1	AC119580.1	8494	chr4	120567801	120567802	-	126
chr4	121262617	121262735	-	17.0381	chr4:121262617:121262735:-_P1	Plxna1	4732	chr4	121262595	121262596	-	21
chr4	124359034	124359300	-	3.83972	chr4:124359034:124359300:-_P1	Prickle2	20858	chr4	124359265	124359266	-	0
chr4	124413467	124413568	-	3.0729	chr4:124413467:124413568:-_P1	Prickle2	75291	chr4	124413510	124413511	-	0
chr4	145487476	145487514	+	1.18102	chr4:145487476:145487514:+_P1	Fancd2	2353	chr4	145487487	145487488	+	0
chr4	146570135	146570197	+	7.46675	chr4:146570135:146570197:+_P1	Atg7	28214	chr4	146570149	146570150	+	0
chr4	151448552	151448818	-	64.0719	chr4:151448552:151448818:-_P1	Adipor2	19658	chr4	151448762	151448763	-	0
chr4	151480075	151480120	-	0.917951	chr4:151480075:151480120:-_P1	Wnt5b	36101	chr4	151480096	151480097	-	0
chr4	152892257	152892299	-	7.04136	chr4:152892257:152892299:-_P1	Ccdc77	9047	chr4	152892272	152892273	-	0
chr4	155084399	155084785	+	71.8969	chr4:155084399:155084785:+_P1	M6pr	3530	chr4	155084414	155084415	+	0
chr4	157374691	157374763	-	7.58989	chr4:157374691:157374763:-_P1	P3h3	1830	chr4	157374836	157374837	-	73
chr4	157681131	157681244	-	5.41255	chr4:157681131:157681244:-_P1	Gapdh	1169	chr4	157680693	157680694	-	437
chr4	157705614	157705787	-	2.88259	chr4:157705614:157705787:-_P1	Ncapd2	1018	chr4	157705640	157705641	-	0
chr4	160706806	160706973	-	6.40327	chr4:160706806:160706973:-_P1	Tspan9	43832	chr4	160707054	160707055	-	81
chr4	161617470	161617593	-	4.08041	chr4:161617470:161617593:-_P1	Tead4	30248	chr4	161617841	161617842	-	248
chr4	161617775	161617885	-	3.36955	chr4:161617775:161617885:-_P1	Tead4	30553	chr4	161617841	161617842	-	0
chr4	161677726	161677818	-	12.4987	chr4:161677726:161677818:-_P1	Rhno1	3840	chr4	161677786	161677787	-	0
chr4	165682934	165683010	+	3.15686	chr4:165682934:165683010:+_P1	Lpal2	49631	chr4	165682962	165682963	+	0
chr4	166870453	166870636	-	16.8534	chr4:166870453:166870636:-_P1	Tas2r121	1054	chr4	166870571	166870572	-	0
chr4	168750551	168750561	+	11.1945	chr4:168750551:168750561:+_P1	Apold1	1570	chr4	168750330	168750331	+	220
chr4	170476970	170477054	+	21.1521	chr4:170476970:170477054:+_P1	Atf7ip	41617	chr4	170476991	170476992	+	0
chr4	170491503	170491544	+	0.766825	chr4:170491503:170491544:+_P1	Atf7ip	27127	chr4	170491524	170491525	+	0
chr4	170509950	170510002	+	12.6946	chr4:170509950:170510002:+_P1	Atf7ip	8669	chr4	170509754	170509755	+	195
chr4	170512717	170512727	+	0.71645	chr4:170512717:170512727:+_P1	Atf7ip	5944	chr4	170512782	170512783	+	55
chr4	171645430	171645688	-	15.9802	chr4:171645430:171645688:-_P1	Eps8	53548	chr4	171645609	171645610	-	0
chr4	174799234	174799541	+	38.9793	chr4:174799234:174799541:+_P1	Aebp2	11416	chr4	174799324	174799325	+	0
chr4	174799670	174799762	+	1.17543	chr4:174799670:174799762:+_P1	Aebp2	11195	chr4	174799324	174799325	+	345
chr4	176928053	176929199	-	126.386	chr4:176928053:176929199:-_P1	Abcc9	5629	chr4	176929418	176929419	-	219
chr4	179477200	179477328	+	101.131	chr4:179477200:179477328:+_P1	Etfrf1	3933	chr4	179477190	179477191	+	9
chr4	180058889	180059161	+	16.4392	chr4:180058889:180059161:+_P1	Rassf8	3636	chr4	180058914	180058915	+	0
chr4	180799950	180800238	-	20.3796	chr4:180799950:180800238:-_P1	Itpr2	77592	chr4	180800197	180800198	-	0
chr4	183375327	183375409	-	5.64204	chr4:183375327:183375409:-_P1	Caprin2	1132	chr4	183375393	183375394	-	0
chr4	183879173	183879579	+	24.2585	chr4:183879173:183879579:+_P1	Resf1	16722	chr4	183879204	183879205	+	0
chr5	172292	172377	+	3.42553	chr5:172292:172377:+_P1	AABR07046628.1	14933	chr5	172345	172346	+	0
chr5	2257909	2257924	+	2.44041	chr5:2257909:2257924:+_P1	AABR07046707.1	20431	chr5	2257829	2257830	+	79
chr5	4371849	4371931	+	4.7129	chr5:4371849:4371931:+_P1	Eya1	1693	chr5	4371888	4371889	+	0
chr5	5466373	5466539	+	57.4839	chr5:5466373:5466539:+_P1	Ncoa2	149942	chr5	5466500	5466501	+	0
chr5	5466845	5466938	+	2.73147	chr5:5466845:5466938:+_P1	Ncoa2	149543	chr5	5466920	5466921	+	0
chr5	8874079	8874194	-	2.53556	chr5:8874079:8874194:-_P1	Cspp1	9501	chr5	8874141	8874142	-	0
chr5	8875918	8875999	-	4.22593	chr5:8875918:8875999:-_P1	Cspp1	11340	chr5	8875983	8875984	-	0
chr5	12203330	12203678	-	153.841	chr5:12203330:12203678:-_P1	Pcmtd1	4047	chr5	12203601	12203602	-	0
chr5	15004983	15005094	+	7.85296	chr5:15004983:15005094:+_P1	Sumo4	21612	chr5	15005042	15005043	+	0
chr5	16843218	16843345	+	63.9264	chr5:16843218:16843345:+_P1	Chchd7	2284	chr5	16843260	16843261	+	0
chr5	21768987	21769175	+	16.6798	chr5:21768987:21769175:+_P1	Chd7	61705	chr5	21769065	21769066	+	0
chr5	24402827	24402928	+	13.551	chr5:24402827:24402928:+_P1	Tp53inp1	7933	chr5	24402907	24402908	+	0
chr5	25249505	25249569	+	0.878771	chr5:25249505:25249569:+_P1	Rbm12b	3439	chr5	25249008	25249009	+	496
chr5	25722184	25722310	+	4.64573	chr5:25722184:25722310:+_P1	LOC679087	3371	chr5	25722230	25722231	+	0
chr5	27284814	27284984	+	1.57843	chr5:27284814:27284984:+_P1	Runx1t1	27942	chr5	27284597	27284598	+	216
chr5	47466291	47466417	+	2.37324	chr5:47466291:47466417:+_P1	Bach2	79595	chr5	47466476	47466477	+	59
chr5	47530945	47531004	+	1.34334	chr5:47530945:47531004:+_P1	Bach2	15008	chr5	47531004	47531005	+	0
chr5	50691207	50691278	-	16.344	chr5:50691207:50691278:-_P1	RGD1359108	6798	chr5	50691269	50691270	-	0
chr5	58149411	58149511	+	8.25037	chr5:58149411:58149511:+_P1	Il11ra1	2472	chr5	58149431	58149432	+	0
chr5	58149713	58149800	+	18.9411	chr5:58149713:58149800:+_P1	Il11ra1	2183	chr5	58149431	58149432	+	281
chr5	58490309	58490470	-	4.37706	chr5:58490309:58490470:-_P1	Fam214b	5409	chr5	58490342	58490343	-	0
chr5	58490309	58490470	-	4.37706	chr5:58490309:58490470:-_P1	Fam214b	5409	chr5	58490451	58490452	-	0
chr5	58490731	58490851	-	3.8957	chr5:58490731:58490851:-_P1	Fam214b	5831	chr5	58490923	58490924	-	72
chr5	59228598	59228638	+	1.67918	chr5:59228598:59228638:+_P1	Hrct1	399	chr5	59228198	59228199	+	399
chr5	59675938	59675995	-	3.75017	chr5:59675938:59675995:-_P1	Rnf38	28305	chr5	59675975	59675976	-	0
chr5	60841505	60841557	+	5.61965	chr5:60841505:60841557:+_P1	Trmt10b	9293	chr5	60841514	60841515	+	0
chr5	61635220	61635323	+	1.09706	chr5:61635220:61635323:+_P1	Tmod1	22182	chr5	61634733	61634734	+	486
chr5	63866302	63866377	+	16.6743	chr5:63866302:63866377:+_P1	Stx17	4053	chr5	63866322	63866323	+	0
chr5	64863110	64863783	-	40.8208	chr5:64863110:64863783:-_P1	Tmem246	12683	chr5	64863714	64863715	-	0
chr5	70522176	70522267	+	11.8102	chr5:70522176:70522267:+_P1	Fktn	6419	chr5	70522187	70522188	+	0
chr5	76376415	76376467	+	0.514948	chr5:76376415:76376467:+_P1	Ugcg	10367	chr5	76376596	76376597	+	129
chr5	76376582	76376710	+	5.19426	chr5:76376582:76376710:+_P1	Ugcg	10124	chr5	76376596	76376597	+	0
chr5	76376833	76376981	+	15.566	chr5:76376833:76376981:+_P1	Ugcg	9853	chr5	76376596	76376597	+	236
chr5	78222184	78222372	-	11.9334	chr5:78222184:78222372:-_P1	Fkbp15	39062	chr5	78222351	78222352	-	0
chr5	91125756	91125759	+	2.58594	chr5:91125756:91125759:+_P1	Kdm4c	307020	chr5	91125625	91125626	+	130
chr5	93365539	93365887	-	14.6089	chr5:93365539:93365887:-_P1	Ptprd	121337	chr5	93366257	93366258	-	370
chr5	93366208	93366322	-	2.08778	chr5:93366208:93366322:-_P1	Ptprd	122006	chr5	93366257	93366258	-	0
chr5	100983085	100983239	-	7.86975	chr5:100983085:100983239:-_P1	Zdhhc21	5183	chr5	100983206	100983207	-	0
chr5	105100055	105100184	+	22.6801	chr5:105100055:105100184:+_P1	Dennd4c	14247	chr5	105100091	105100092	+	0
chr5	105100330	105100430	+	1.87508	chr5:105100330:105100430:+_P1	Dennd4c	14001	chr5	105100091	105100092	+	238
chr5	114340775	114340838	-	1.18662	chr5:114340775:114340838:-_P1	Jun	326498	chr5	114340827	114340828	-	0
chr5	119596227	119596275	+	1.74635	chr5:119596227:119596275:+_P1	Cachd1	131562	chr5	119596539	119596540	+	264
chr5	120091222	120091500	-	87.989	chr5:120091222:120091500:-_P1	Jak1	7318	chr5	120091425	120091426	-	0
chr5	121759521	121759709	+	14.4633	chr5:121759521:121759709:+_P1	Pde4b	193266	chr5	121759468	121759469	+	52
chr5	122301525	122301586	+	1.15304	chr5:122301525:122301586:+_P1	Sgip1	88934	chr5	122301532	122301533	+	0
chr5	126666938	126667020	+	3.24082	chr5:126666938:126667020:+_P1	Cyb5rl	1667	chr5	126666958	126666959	+	0
chr5	128449752	128449888	-	38.6995	chr5:128449752:128449888:-_P1	Btf3l4	3027	chr5	128449858	128449859	-	0
chr5	129370478	129370758	+	37.608	chr5:129370478:129370758:+_P1	AABR07049579.2	10006	chr5	129370525	129370526	+	0
chr5	129754198	129754279	+	1.16983	chr5:129754198:129754279:+_P1	Dmrta2	1868	chr5	129754250	129754251	+	0
chr5	134551273	134551310	-	0.604505	chr5:134551273:134551310:-_P1	Cyp4b1	25184	chr5	134551470	134551471	-	160
chr5	136717467	136717574	-	5.96668	chr5:136717467:136717574:-_P1	B4galt2	1486	chr5	136717513	136717514	-	0
chr5	139379733	139379761	+	1.53365	chr5:139379733:139379761:+_P1	Scmh1	5666	chr5	139379634	139379635	+	98
chr5	146832547	146832619	+	1.36573	chr5:146832547:146832619:+_P1	Phc2	50135	chr5	146832556	146832557	+	0
chr5	146985420	146985864	-	9.19071	chr5:146985420:146985864:-_P1	Zfp362	11488	chr5	146985624	146985625	-	0
chr5	147068379	147068445	+	1.4385	chr5:147068379:147068445:+_P1	Trim62	1169	chr5	147068426	147068427	+	0
chr5	147779557	147779639	-	0.867576	chr5:147779557:147779639:-_P1	Fam167b	4670	chr5	147779585	147779586	-	0
chr5	150217562	150217710	-	8.1832	chr5:150217562:150217710:-_P1	Epb41	50485	chr5	150217655	150217656	-	0
chr5	151209858	151209957	+	26.9396	chr5:151209858:151209957:+_P1	Ahdc1	1383	chr5	151209869	151209870	+	0
chr5	151319366	151319561	+	78.9158	chr5:151319366:151319561:+_P1	Wasf2	23930	chr5	151319425	151319426	+	0
chr5	153843584	153843731	-	22.5962	chr5:153843584:153843731:-_P1	Nipal3	3406	chr5	153843699	153843700	-	0
chr5	154517050	154517128	+	0.789214	chr5:154517050:154517128:+_P1	E2f2	4989	chr5	154517071	154517072	+	0
chr5	154644602	154644686	+	11.5975	chr5:154644602:154644686:+_P1	Zfp46	5944	chr5	154644552	154644553	+	49
chr5	155411026	155411085	-	3.74457	chr5:155411026:155411085:-_P1	Zbtb40	29294	chr5	155411038	155411039	-	0
chr5	160769367	160769507	-	6.50962	chr5:160769367:160769507:-_P1	Kazn	26888	chr5	160769459	160769460	-	0
chr5	164715188	164715519	-	42.2649	chr5:164715188:164715519:-_P1	Mfn2	1043	chr5	164715604	164715605	-	85
chr5	164844681	164844842	+	9.42579	chr5:164844681:164844842:+_P1	Mthfr	1081	chr5	164844772	164844773	+	0
chr5	164961648	164962103	-	88.2912	chr5:164961648:164962103:-_P1	Fbxo6	1797	chr5	164962294	164962295	-	191
chr5	165263460	165263505	-	0.565324	chr5:165263460:165263505:-_P1	Ubiad1	4236	chr5	165263500	165263501	-	0
chr5	166650078	166650170	-	2.22771	chr5:166650078:166650170:-_P1	Pik3cd	22050	chr5	166650125	166650126	-	0
chr5	166939596	166939626	-	0.570921	chr5:166939596:166939626:-_P1	Spsb1	12960	chr5	166939923	166939924	-	297
chr5	166978430	166978501	-	3.56546	chr5:166978430:166978501:-_P1	Spsb1	51794	chr5	166978461	166978462	-	0
chr5	172913801	172914099	+	155.805	chr5:172913801:172914099:+_P1	Gnb1	20889	chr5	172913898	172913899	+	0
chr5	172984938	172984960	+	0.649283	chr5:172984938:172984960:+_P1	Nadk	1329	chr5	172984701	172984702	+	236
chr6	1514213	1514293	+	97.426	chr6:1514213:1514293:+_P1	Cebpzos	1863	chr6	1513714	1513715	+	498
chr6	4564108	4564338	-	126.498	chr6:4564108:4564338:-_P1	Slc8a1	43504	chr6	4564376	4564377	-	38
chr6	7784740	7784816	+	3.43672	chr6:7784740:7784816:+_P1	Plekhh2	8917	chr6	7784804	7784805	+	0
chr6	10593893	10593972	-	11.8774	chr6:10593893:10593972:-_P1	Pigf	1439	chr6	10593953	10593954	-	0
chr6	12158070	12158253	+	14.9727	chr6:12158070:12158253:+_P1	Foxn2	20972	chr6	12158143	12158144	+	0
chr6	12158379	12158556	+	3.81733	chr6:12158379:12158556:+_P1	Foxn2	20669	chr6	12158143	12158144	+	235
chr6	12332434	12332496	+	8.95003	chr6:12332434:12332496:+_P1	Ston1	30315	chr6	12332471	12332472	+	0
chr6	15194810	15194942	-	0.884368	chr6:15194810:15194942:-_P1	Nrxn1	3150	chr6	15194834	15194835	-	0
chr6	21171447	21171571	-	22.5514	chr6:21171447:21171571:-_P1	Rasgrp3	35567	chr6	21171732	21171733	-	161
chr6	24137489	24137622	+	4.12518	chr6:24137489:24137622:+_P1	Lbh	22602	chr6	24137430	24137431	+	58
chr6	26680407	26680500	-	6.39208	chr6:26680407:26680500:-_P1	Cad	123	chr6	26680283	26680284	-	123
chr6	26923366	26923479	-	28.2102	chr6:26923366:26923479:-_P1	Mapre3	33484	chr6	26923430	26923431	-	0
chr6	27589263	27589566	-	918.673	chr6:27589263:27589566:-_P1	Hadhb	6268	chr6	27589495	27589496	-	0
chr6	27589263	27589566	-	918.673	chr6:27589263:27589566:-_P1	Hadhb	6268	chr6	27589513	27589514	-	0
chr6	28997745	28998039	-	42.0243	chr6:28997745:28998039:-_P1	Ubxn2a	3226	chr6	28997996	28997997	-	0
chr6	30631331	30631406	+	1.83031	chr6:30631331:30631406:+_P1	AABR07063424.1	7325	chr6	30630901	30630902	+	429
chr6	30641546	30641565	+	0.509351	chr6:30641546:30641565:+_P1	AABR07063424.1	2813	chr6	30641116	30641117	+	429
chr6	41040737	41041055	-	23.8779	chr6:41040737:41041055:-_P1	Trib2	1300	chr6	41041041	41041042	-	0
chr6	41905052	41905212	-	11.9949	chr6:41905052:41905212:-_P1	Lpin1	35006	chr6	41905163	41905164	-	0
chr6	50855050	50855107	+	2.446	chr6:50855050:50855107:+_P1	Cog5	99522	chr6	50854968	50854969	+	81
chr6	51501063	51501172	-	2.50198	chr6:51501063:51501172:-_P1	Pik3cg	2726	chr6	51501119	51501120	-	0
chr6	54158660	54158740	-	3.35836	chr6:54158660:54158740:-_P1	Hdac9	99541	chr6	54159015	54159016	-	275
chr6	54158983	54159046	-	1.75194	chr6:54158983:54159046:-_P1	Hdac9	99864	chr6	54159015	54159016	-	0
chr6	60374509	60374673	+	6.5432	chr6:60374509:60374673:+_P1	Dock4	191521	chr6	60374524	60374525	+	0
chr6	78119944	78120148	-	4.79686	chr6:78119944:78120148:-_P1	Slc25a21	271510	chr6	78120341	78120342	-	193
chr6	95314871	95314958	+	20.2957	chr6:95314871:95314958:+_P1	AABR07064804.1	8619	chr6	95314936	95314937	+	0
chr6	98631435	98631495	-	1.39932	chr6:98631435:98631495:-_P1	Wdr89	25326	chr6	98631462	98631463	-	0
chr6	99401236	99401321	+	0.587713	chr6:99401236:99401321:+_P1	Zbtb1	1037	chr6	99401764	99401765	+	443
chr6	99613106	99613231	+	5.53569	chr6:99613106:99613231:+_P1	Plekhg3	12073	chr6	99613140	99613141	+	0
chr6	102473970	102474035	+	0.996313	chr6:102473970:102474035:+_P1	Rad51b	2999	chr6	102474017	102474018	+	0
chr6	107703359	107703460	-	12.8849	chr6:107703359:107703460:-_P1	Elmsan1	25203	chr6	107703411	107703412	-	0
chr6	108123699	108123833	-	19.4953	chr6:108123699:108123833:-_P1	Entpd5	3120	chr6	108123806	108123807	-	0
chr6	108977877	108977965	-	10.0975	chr6:108977877:108977965:-_P1	Rps6kl1	1388	chr6	108978112	108978113	-	147
chr6	109936671	109936717	-	0.414198	chr6:109936671:109936717:-_P1	Tgfb3	1138	chr6	109936420	109936421	-	250
chr6	110300955	110301377	+	57.5791	chr6:110300955:110301377:+_P1	Esrrb	108762	chr6	110300961	110300962	+	0
chr6	114685847	114685899	-	0.34703	chr6:114685847:114685899:-_P1	AC118957.2	196967	chr6	114685851	114685852	-	0
chr6	123895802	123895850	+	2.22211	chr6:123895802:123895850:+_P1	Tdp1	2104	chr6	123895842	123895843	+	0
chr6	126350557	126350776	+	21.2136	chr6:126350557:126350776:+_P1	Golga5	2445	chr6	126350638	126350639	+	0
chr6	126748415	126748562	-	30.2084	chr6:126748415:126748562:-_P1	Btbd7	37557	chr6	126748497	126748498	-	0
chr6	129519501	129519657	-	13.2823	chr6:129519501:129519657:-_P1	Atg2b	9781	chr6	129519609	129519610	-	0
chr6	132089931	132090122	-	43.7706	chr6:132089931:132090122:-_P1	Setd3	14056	chr6	132090083	132090084	-	0
chr6	132282992	132283173	+	58.7321	chr6:132282992:132283173:+_P1	Cyp46a1	36390	chr6	132283058	132283059	+	0
chr6	132339400	132339658	+	5.41255	chr6:132339400:132339658:+_P1	Eml1	43677	chr6	132339594	132339595	+	0
chr6	135304544	135304638	+	5.65324	chr6:135304544:135304638:+_P1	Tecpr2	8368	chr6	135304570	135304571	+	0
chr6	136002977	136003207	+	76.3019	chr6:136002977:136003207:+_P1	NEWGENE_619861	1005	chr6	136002870	136002871	+	106
chr6	136469647	136469783	-	19.596	chr6:136469647:136469783:-_P1	Ppp1r13b	32829	chr6	136469764	136469765	-	0
chr6	137060967	137061003	+	1.13624	chr6:137060967:137061003:+_P1	LOC691485	2606	chr6	137060568	137060569	+	398
chr6	137153548	137153642	+	6.86225	chr6:137153548:137153642:+_P1	AABR07065602.1	10891	chr6	137153574	137153575	+	0
chr6	137238786	137238946	-	66.0813	chr6:137238786:137238946:-_P1	Akt1	2528	chr6	137238480	137238481	-	305
chr6	137285165	137285226	+	1.31536	chr6:137285165:137285226:+_P1	Cep170b	3582	chr6	137284933	137284934	+	231
chr6	147855115	147855259	+	20.2285	chr6:147855115:147855259:+_P1	Tmem196	20976	chr6	147855147	147855148	+	0
chr7	712723	712783	-	0.850784	chr7:712723:712783:-_P1	Arl13b	475380	chr7	712997	712998	-	214
chr7	2592391	2592562	-	8.84368	chr7:2592391:2592562:-_P1	Rbms2	3548	chr7	2592927	2592928	-	365
chr7	9884055	9884128	+	4.33228	chr7:9884055:9884128:+_P1	LOC100910577	13853	chr7	9884073	9884074	+	0
chr7	10436653	10436760	-	8.21678	chr7:10436653:10436760:-_P1	Zfp709l1	5661	chr7	10436752	10436753	-	0
chr7	10795967	10796066	-	4.0972	chr7:10795967:10796066:-_P1	AABR07055834.1	22080	chr7	10796027	10796028	-	0
chr7	12276905	12277034	-	1.38252	chr7:12276905:12277034:-_P1	Apc2	1296	chr7	12277442	12277443	-	408
chr7	12277441	12277482	-	0.643685	chr7:12277441:12277482:-_P1	Apc2	1832	chr7	12277442	12277443	-	0
chr7	12280382	12280455	-	2.26689	chr7:12280382:12280455:-_P1	Rps15	3151	chr7	12280457	12280458	-	2
chr7	12314263	12314337	-	5.13269	chr7:12314263:12314337:-_P1	Dazap1	3114	chr7	12314693	12314694	-	356
chr7	12348137	12348233	-	6.65515	chr7:12348137:12348233:-_P1	Pwwp3a	1662	chr7	12348199	12348200	-	0
chr7	12432863	12432875	+	0.873173	chr7:12432863:12432875:+_P1	Cbarp	1056	chr7	12432829	12432830	+	33
chr7	15079537	15079624	-	4.47781	chr7:15079537:15079624:-_P1	Zfp799	6485	chr7	15079605	15079606	-	0
chr7	15172411	15172561	-	3.72218	chr7:15172411:15172561:-_P1	Zfp870	8545	chr7	15172523	15172524	-	0
chr7	15315209	15315285	-	11.8326	chr7:15315209:15315285:-_P1	Zfp763	13827	chr7	15315271	15315272	-	0
chr7	15413824	15413948	+	5.39576	chr7:15413824:15413948:+_P1	Zfp563	8529	chr7	15413841	15413842	+	0
chr7	15775705	15775792	+	57.8869	chr7:15775705:15775792:+_P1	Zfp955a	9616	chr7	15775713	15775714	+	0
chr7	15865369	15865471	-	1.39372	chr7:15865369:15865471:-_P1	AABR07055919.2	8693	chr7	15865432	15865433	-	0
chr7	24893790	24893959	-	52.1721	chr7:24893790:24893959:-_P1	Tcp11l2	8015	chr7	24893957	24893958	-	0
chr7	27146845	27146976	+	1.58403	chr7:27146845:27146976:+_P1	Glt8d2	27904	chr7	27146462	27146463	+	382
chr7	29992959	29993019	-	0.666074	chr7:29992959:29993019:-_P1	Gas2l3	6796	chr7	29992984	29992985	-	0
chr7	34149247	34149667	-	90.894	chr7:34149247:34149667:-_P1	Elk3	27553	chr7	34149842	34149843	-	175
chr7	52508519	52508582	-	0.699658	chr7:52508519:52508582:-_P1	Nav3	103745	chr7	52508680	52508681	-	98
chr7	59971355	59971542	-	24.5888	chr7:59971355:59971542:-_P1	Rab3ip	14123	chr7	59971497	59971498	-	0
chr7	65004555	65004604	+	16.9597	chr7:65004555:65004604:+_P1	Llph	1185	chr7	65004445	65004446	+	109
chr7	70345892	70346059	+	47.4256	chr7:70345892:70346059:+_P1	Cdk4	3802	chr7	70345824	70345825	+	67
chr7	70677082	70677407	+	45.7408	chr7:70677082:70677407:+_P1	R3hdm2	19641	chr7	70677114	70677115	+	0
chr7	75299628	75299629	-	0.548532	chr7:75299628:75299629:-_P1	Ankrd46	11263	chr7	75299738	75299739	-	109
chr7	75300344	75300438	-	36.1639	chr7:75300344:75300438:-_P1	Ankrd46	11979	chr7	75300409	75300410	-	0
chr7	94604424	94604549	-	3.45351	chr7:94604424:94604549:-_P1	Enpp2	41423	chr7	94604533	94604534	-	0
chr7	98812927	98812990	-	14.5697	chr7:98812927:98812990:-_P1	Tatdn1	8428	chr7	98813029	98813030	-	39
chr7	104578705	104578827	-	27.4938	chr7:104578705:104578827:-_P1	Fam49b	22286	chr7	104578893	104578894	-	66
chr7	104641767	104641983	-	7.1533	chr7:104641767:104641983:-_P1	Fam49b	85348	chr7	104641955	104641956	-	0
chr7	114308836	114308924	-	18.6669	chr7:114308836:114308924:-_P1	Trappc9	2940	chr7	114309093	114309094	-	169
chr7	114309038	114309122	-	4.08041	chr7:114309038:114309122:-_P1	Trappc9	3142	chr7	114309093	114309094	-	0
chr7	114611307	114611318	-	3.57665	chr7:114611307:114611318:-_P1	Ptk2	21188	chr7	114611487	114611488	-	169
chr7	114867041	114867091	-	1.50566	chr7:114867041:114867091:-_P1	Slc45a4	18627	chr7	114867095	114867096	-	4
chr7	116942668	116942766	-	97.6387	chr7:116942668:116942766:-_P1	Eef1d	5994	chr7	116942868	116942869	-	102
chr7	116942905	116943000	-	6.86784	chr7:116942905:116943000:-_P1	Eef1d	6231	chr7	116942868	116942869	-	36
chr7	116973626	116973703	+	7.42757	chr7:116973626:116973703:+_P1	Zfp623	6371	chr7	116973601	116973602	+	24
chr7	118113308	118113356	-	3.82853	chr7:118113308:118113356:-_P1	Mb	4444	chr7	118113409	118113410	-	53
chr7	118847034	118847108	-	19.7583	chr7:118847034:118847108:-_P1	AABR07058476.1	6400	chr7	118847105	118847106	-	0
chr7	120063085	120063377	+	82.4813	chr7:120063085:120063377:+_P1	Cdc42ep1	4000	chr7	120062996	120062997	+	88
chr7	120675499	120675638	-	20.917	chr7:120675499:120675638:-_P1	Csnk1e	3140	chr7	120675562	120675563	-	0
chr7	123034054	123034187	+	5.07672	chr7:123034054:123034187:+_P1	Tef	9314	chr7	123033985	123033986	+	68
chr7	123362424	123362519	+	2.29488	chr7:123362424:123362519:+_P1	Ccdc134	1791	chr7	123362456	123362457	+	0
chr7	129746885	129746902	+	3.49829	chr7:129746885:129746902:+_P1	Zbed4	2810	chr7	129746885	129746886	+	0
chr7	130102099	130102204	-	6.80068	chr7:130102099:130102204:-_P1	Tubgcp6	241	chr7	130102230	130102231	-	26
chr7	130158491	130158501	-	0.722047	chr7:130158491:130158501:-_P1	Plxnb2	6611	chr7	130158855	130158856	-	354
chr7	130161464	130161613	-	14.9167	chr7:130161464:130161613:-_P1	Dennd6b	8994	chr7	130161819	130161820	-	206
chr7	132200904	132200953	-	5.04873	chr7:132200904:132200953:-_P1	Kif21a	57434	chr7	132200942	132200943	-	0
chr7	134799268	134799485	-	11.9502	chr7:134799268:134799485:-_P1	Prickle1	77053	chr7	134799418	134799419	-	0
chr7	135803535	135803577	-	1.14184	chr7:135803535:135803577:-_P1	Pus7l	3054	chr7	135803640	135803641	-	63
chr7	139684432	139684619	-	9.22429	chr7:139684432:139684619:-_P1	Senp1	9187	chr7	139685014	139685015	-	395
chr7	139684729	139684803	-	0.934743	chr7:139684729:139684803:-_P1	Senp1	9484	chr7	139685014	139685015	-	211
chr7	140485440	140485599	-	3.00013	chr7:140485440:140485599:-_P1	Ddn	1747	chr7	140485730	140485731	-	131
chr7	140958932	140958996	+	0.934743	chr7:140958932:140958996:+_P1	Prpf40b	8284	chr7	140958969	140958970	+	0
chr7	140959099	140959218	+	5.97788	chr7:140959099:140959218:+_P1	Prpf40b	8062	chr7	140958969	140958970	+	129
chr7	141033088	141033341	-	33.606	chr7:141033088:141033341:-_P1	Fmnl3	31095	chr7	141033312	141033313	-	0
chr7	141118187	141118302	-	10.243	chr7:141118187:141118302:-_P1	Bcdin3d	18396	chr7	141118219	141118220	-	0
chr7	141257203	141257284	+	0.722047	chr7:141257203:141257284:+_P1	Aqp6	1298	chr7	141257441	141257442	+	157
chr7	141630193	141630351	+	35.0053	chr7:141630193:141630351:+_P1	AABR07058884.2	12424	chr7	141630247	141630248	+	0
chr7	141630707	141630782	+	1.06348	chr7:141630707:141630782:+_P1	AABR07058884.2	11993	chr7	141630247	141630248	+	459
chr7	143704401	143704455	+	1.20901	chr7:143704401:143704455:+_P1	Tns2	2780	chr7	143704684	143704685	+	229
chr7	143704967	143705041	+	1.20901	chr7:143704967:143705041:+_P1	Tns2	2194	chr7	143704684	143704685	+	282
chr7	143810171	143810240	-	3.0617	chr7:143810171:143810240:-_P1	Csad	16201	chr7	143809987	143809988	-	183
chr7	144783658	144783713	-	2.20532	chr7:144783658:144783713:-_P1	Smug1	5002	chr7	144783695	144783696	-	0
chr7	144864915	144865059	-	19.8143	chr7:144864915:144865059:-_P1	Nfe2	15031	chr7	144865001	144865002	-	0
chr8	1450313	1450566	+	13.5454	chr8:1450313:1450566:+_P1	Kbtbd3	8958	chr8	1450348	1450349	+	0
chr8	6036546	6036667	-	17.7377	chr8:6036546:6036667:-_P1	Birc2	2404	chr8	6036655	6036656	-	0
chr8	7446065	7446289	-	6.17938	chr8:7446065:7446289:-_P1	Arhgap42	19454	chr8	7446240	7446241	-	0
chr8	10981389	10981468	+	1.46089	chr8:10981389:10981468:+_P1	Ccdc82	907121	chr8	10981411	10981412	+	0
chr8	11930283	11930491	+	6.7503	chr8:11930283:11930491:+_P1	Maml2	1274	chr8	11930346	11930347	+	0
chr8	12927621	12927705	-	4.52259	chr8:12927621:12927705:-_P1	AABR07069219.1	25359	chr8	12927993	12927994	-	288
chr8	14027924	14028043	+	14.0715	chr8:14027924:14028043:+_P1	Smco4	32349	chr8	14028131	14028132	+	88
chr8	14028167	14028340	+	5.26143	chr8:14028167:14028340:+_P1	Smco4	32052	chr8	14028131	14028132	+	35
chr8	21509849	21509922	-	4.56177	chr8:21509849:21509922:-_P1	Zfp266	9089	chr8	21509928	21509929	-	6
chr8	21542930	21543112	-	21.2304	chr8:21542930:21543112:-_P1	Zfp266	19390	chr8	21542910	21542911	-	19
chr8	21543227	21543301	-	0.856381	chr8:21543227:21543301:-_P1	Zfp266	19687	chr8	21542910	21542911	-	316
chr8	21601205	21601538	+	8.78211	chr8:21601205:21601538:+_P1	Zfp846	9779	chr8	21601175	21601176	+	29
chr8	21663180	21663241	-	3.10088	chr8:21663180:21663241:-_P1	Fbxl12	1921	chr8	21662715	21662716	-	464
chr8	22351268	22351380	+	45.6625	chr8:22351268:22351380:+_P1	Slc44a2	17363	chr8	22351299	22351300	+	0
chr8	23174818	23174819	+	1.06348	chr8:23174818:23174819:+_P1	Pigy	6844	chr8	23174818	23174819	+	0
chr8	23397009	23397136	-	4.41064	chr8:23397009:23397136:-_P1	Anln	6236	chr8	23397073	23397074	-	0
chr8	26348862	26348934	-	0.65488	chr8:26348862:26348934:-_P1	AC094212.1	3108	chr8	26348914	26348915	-	0
chr8	28842368	28842517	+	1.48328	chr8:28842368:28842517:+_P1	Spata19	387406	chr8	28842403	28842404	+	0
chr8	32422358	32422458	+	2.11577	chr8:32422358:32422458:+_P1	Prdm10	30425	chr8	32422360	32422361	+	0
chr8	33148266	33148446	+	8.19999	chr8:33148266:33148446:+_P1	Arhgap32	90691	chr8	33148395	33148396	+	0
chr8	36761785	36761841	+	5.27822	chr8:36761785:36761841:+_P1	Pus3	5134	chr8	36761781	36761782	+	3
chr8	39271076	39271267	-	38.5819	chr8:39271076:39271267:-_P1	Ei24	4117	chr8	39271251	39271252	-	0
chr8	48404028	48404201	+	6.00586	chr8:48404028:48404201:+_P1	Usp2	2057	chr8	48404093	48404094	+	0
chr8	48600204	48600443	-	17.122	chr8:48600204:48600443:-_P1	Nlrx1	2337	chr8	48600410	48600411	-	0
chr8	48637379	48637446	-	5.59726	chr8:48637379:48637446:-_P1	Hinfp	2582	chr8	48637486	48637487	-	40
chr8	49075944	49075990	+	1.37133	chr8:49075944:49075990:+_P1	Ift46	1061	chr8	49075980	49075981	+	0
chr8	49186109	49186169	-	6.89583	chr8:49186109:49186169:-_P1	Kmt2a	27138	chr8	49185843	49185844	-	265
chr8	50132322	50132485	-	15.3813	chr8:50132322:50132485:-_P1	Cep164	5909	chr8	50132455	50132456	-	0
chr8	53817880	53817887	-	1.13065	chr8:53817880:53817887:-_P1	Ttc12	1433	chr8	53817870	53817871	-	9
chr8	54134600	54134908	-	6.30252	chr8:54134600:54134908:-_P1	Ncam1	233242	chr8	54134829	54134830	-	0
chr8	56570580	56570874	+	69.6132	chr8:56570580:56570874:+_P1	Rdx	14520	chr8	56570719	56570720	+	0
chr8	60593456	60593611	-	6.81747	chr8:60593456:60593611:-_P1	Scaper	23398	chr8	60593564	60593565	-	0
chr8	61923120	61923175	-	3.66621	chr8:61923120:61923175:-_P1	RGD1305464	3246	chr8	61923137	61923138	-	0
chr8	63599036	63599318	-	2.74826	chr8:63599036:63599318:-_P1	Rec114	65490	chr8	63599292	63599293	-	0
chr8	65413300	65413533	-	45.0524	chr8:65413300:65413533:-_P1	Lrrc49	173892	chr8	65413480	65413481	-	0
chr8	66750375	66750425	-	1.85269	chr8:66750375:66750425:-_P1	Rplp1	113049	chr8	66750408	66750409	-	0
chr8	69722219	69722579	-	51.0191	chr8:69722219:69722579:-_P1	Dis3l	85245	chr8	69722556	69722557	-	0
chr8	70293331	70293510	+	7.41078	chr8:70293331:70293510:+_P1	Dennd4a	24074	chr8	70293359	70293360	+	0
chr8	71533364	71533529	+	5.00955	chr8:71533364:71533529:+_P1	Csnk1g1	13937	chr8	71533437	71533438	+	0
chr8	78278352	78278499	-	24.0794	chr8:78278352:78278499:-_P1	Cgnl1	44922	chr8	78278497	78278498	-	0
chr8	82547154	82547513	-	14.3178	chr8:82547154:82547513:-_P1	Tmod2	13465	chr8	82547469	82547470	-	0
chr8	85220936	85221078	+	35.1004	chr8:85220936:85221078:+_P1	Elovl5	38902	chr8	85220964	85220965	+	0
chr8	87583621	87583828	+	20.5699	chr8:87583621:87583828:+_P1	Myo6	47086	chr8	87583674	87583675	+	0
chr8	96332514	96332639	-	7.33801	chr8:96332514:96332639:-_P1	Syncrip	66172	chr8	96332616	96332617	-	0
chr8	103929061	103929152	+	1.98703	chr8:103929061:103929152:+_P1	Gk5	9366	chr8	103929100	103929101	+	0
chr8	106582285	106582381	+	22.5458	chr8:106582285:106582381:+_P1	AABR07071244.1	4306	chr8	106582337	106582338	+	0
chr8	107217922	107217966	+	0.861979	chr8:107217922:107217966:+_P1	Faim	7244	chr8	107217966	107217967	+	0
chr8	114498563	114498809	-	9.84559	chr8:114498563:114498809:-_P1	Col6a6	48607	chr8	114498763	114498764	-	0
chr8	114518053	114518149	-	0.951535	chr8:114518053:114518149:-_P1	Col6a6	68097	chr8	114518013	114518014	-	39
chr8	115490627	115490801	-	19.2266	chr8:115490627:115490801:-_P1	Rad54l2	39222	chr8	115490745	115490746	-	0
chr8	116365186	116365263	-	1.52246	chr8:116365186:116365263:-_P1	Sema3b	3843	chr8	116365391	116365392	-	128
chr8	116781964	116782057	+	21.9693	chr8:116781964:116782057:+_P1	AC128059.1	5470	chr8	116782004	116782005	+	0
chr8	116781964	116782057	+	21.9693	chr8:116781964:116782057:+_P1	AC128059.1	5470	chr8	116782029	116782030	+	0
chr8	117082305	117082619	+	324.126	chr8:117082305:117082619:+_P1	Amt	13723	chr8	117082471	117082472	+	0
chr8	117082841	117083045	+	9.03958	chr8:117082841:117083045:+_P1	Amt	14259	chr8	117083099	117083100	+	54
chr8	117832894	117832943	+	1.12505	chr8:117832894:117832943:+_P1	Plxnb1	3756	chr8	117832814	117832815	+	79
chr8	117833872	117833952	+	0.923549	chr8:117833872:117833952:+_P1	Plxnb1	2747	chr8	117833894	117833895	+	0
chr8	118737571	118737691	-	12.8345	chr8:118737571:118737691:-_P1	Klhl18	41384	chr8	118737647	118737648	-	0
chr8	122913581	122913653	-	0.822798	chr8:122913581:122913653:-_P1	Cmtm8	8668	chr8	122913698	122913699	-	45
chr8	123030761	123030826	+	1.31536	chr8:123030761:123030826:+_P1	Osbpl10	95839	chr8	123030816	123030817	+	0
chr8	126412042	126412089	-	1.74075	chr8:126412042:126412089:-_P1	AABR07071661.1	21241	chr8	126411554	126411555	-	487
chr8	126973175	126973271	+	1.94785	chr8:126973175:126973271:+_P1	AABR07071701.1	2560	chr8	126973195	126973196	+	0
chr8	129600955	129601142	+	152.307	chr8:129600955:129601142:+_P1	Ctnnb1	16668	chr8	129601402	129601403	+	260
chr8	130006469	130006760	+	15.6276	chr8:130006469:130006760:+_P1	Trak1	2811	chr8	130005969	130005970	+	499
chr8	130345565	130345614	-	1.69037	chr8:130345565:130345614:-_P1	Sec22c	7240	chr8	130345584	130345585	-	0
chr8	130531154	130531211	+	1.0299	chr8:130531154:130531211:+_P1	Ackr2	7438	chr8	130531176	130531177	+	0
chr8	130534349	130534427	+	0.554129	chr8:130534349:130534427:+_P1	Ackr2	4222	chr8	130533891	130533892	+	457
chr8	130631078	130631145	-	7.80259	chr8:130631078:130631145:-_P1	Pomgnt2	13245	chr8	130631304	130631305	-	159
chr8	131904232	131904324	-	19.3162	chr8:131904232:131904324:-_P1	Zfp445	5209	chr8	131904308	131904309	-	0
chr8	132204387	132204591	-	43.737	chr8:132204387:132204591:-_P1	Zdhhc3	14999	chr8	132204422	132204423	-	0
chr8	133193481	133193519	+	0.610102	chr8:133193481:133193519:+_P1	AABR07071838.1	1767	chr8	133193268	133193269	+	212
chr8	133275037	133275093	+	3.01693	chr8:133275037:133275093:+_P1	AABR07071842.1	9969	chr8	133275086	133275087	+	0
chr9	7902139	7902256	-	2.13816	chr9:7902139:7902256:-_P1	Pot1b	10625	chr9	7902223	7902224	-	0
chr9	10300257	10300316	+	8.97241	chr9:10300257:10300316:+_P1	Nrtn	5152	chr9	10300272	10300273	+	0
chr9	10381252	10381420	-	48.8417	chr9:10381252:10381420:-_P1	Ranbp3	11315	chr9	10381854	10381855	-	434
chr9	10769729	10769826	+	33.55	chr9:10769729:10769826:+_P1	Plin3	4073	chr9	10769485	10769486	+	243
chr9	15263868	15264145	-	43.877	chr9:15263868:15264145:-_P1	Pgc	10770	chr9	15264134	15264135	-	0
chr9	15306714	15306793	+	1.24819	chr9:15306714:15306793:+_P1	Prickle4	2332	chr9	15306958	15306959	+	165
chr9	15306914	15306992	+	3.10648	chr9:15306914:15306992:+_P1	Prickle4	2133	chr9	15306958	15306959	+	0
chr9	17698643	17698808	+	17.2732	chr9:17698643:17698808:+_P1	Tmem63b	6402	chr9	17698650	17698651	+	0
chr9	17698643	17698808	+	17.2732	chr9:17698643:17698808:+_P1	Tmem63b	6402	chr9	17698756	17698757	+	0
chr9	27005316	27005409	+	3.67181	chr9:27005316:27005409:+_P1	Paqr8	28611	chr9	27005322	27005323	+	0
chr9	27533849	27533948	-	8.42388	chr9:27533849:27533948:-_P1	Gsta6	22673	chr9	27534071	27534072	-	123
chr9	38201924	38202221	-	17.3795	chr9:38201924:38202221:-_P1	Dst	5651	chr9	38201875	38201876	-	48
chr9	44658634	44658711	+	33.5444	chr9:44658634:44658711:+_P1	Eif5b	22781	chr9	44658665	44658666	+	0
chr9	49994677	49994982	-	1337.26	chr9:49994677:49994982:-_P1	Fhl2	44584	chr9	49995397	49995398	-	415
chr9	50884761	50884839	+	2.27249	chr9:50884761:50884839:+_P1	Bivm	7764	chr9	50884610	50884611	+	150
chr9	50885285	50885379	+	1.62321	chr9:50885285:50885379:+_P1	Bivm	7224	chr9	50885317	50885318	+	0
chr9	50885810	50885872	+	4.47781	chr9:50885810:50885872:+_P1	Bivm	6731	chr9	50885317	50885318	+	492
chr9	53120430	53120538	-	2.57474	chr9:53120430:53120538:-_P1	Ormdl1	1817	chr9	53120498	53120499	-	0
chr9	53544585	53544944	+	14.2003	chr9:53544585:53544944:+_P1	Inpp1	1072	chr9	53544501	53544502	+	83
chr9	62016063	62016162	+	5.27262	chr9:62016063:62016162:+_P1	LOC100911305	192532	chr9	62016118	62016119	+	0
chr9	65329116	65329220	+	7.06375	chr9:65329116:65329220:+_P1	Nif3l1	2068	chr9	65329135	65329136	+	0
chr9	66951426	66951685	+	25.5963	chr9:66951426:66951685:+_P1	Nbeal1	1033	chr9	66951540	66951541	+	0
chr9	67199783	67200077	+	44.7221	chr9:67199783:67200077:+_P1	Abi2	34224	chr9	67199853	67199854	+	0
chr9	67370018	67370408	-	49.5582	chr9:67370018:67370408:-_P1	Raph1	28677	chr9	67370311	67370312	-	0
chr9	69886991	69887546	-	9.23549	chr9:69886991:69887546:-_P1	Ino80d	8285	chr9	69887487	69887488	-	0
chr9	69886991	69887546	-	9.23549	chr9:69886991:69887546:-_P1	Ino80d	8285	chr9	69887531	69887532	-	0
chr9	69887852	69887885	+	0.47017	chr9:69887852:69887885:+_P1	Eef1b2	65553	chr9	69887868	69887869	+	0
chr9	71903729	71903861	-	56.6163	chr9:71903729:71903861:-_P1	Idh1	3685	chr9	71903833	71903834	-	0
chr9	71911585	71911649	-	2.54116	chr9:71911585:71911649:-_P1	Idh1	11541	chr9	71911616	71911617	-	0
chr9	71911725	71911917	+	16.9205	chr9:71911725:71911917:+_P1	Pikfyve	3502	chr9	71911769	71911770	+	0
chr9	73816097	73816253	-	11.6031	chr9:73816097:73816253:-_P1	Kansl1l	16670	chr9	73816232	73816233	-	0
chr9	76770184	76770229	-	1.12505	chr9:76770184:76770229:-_P1	Ikzf2	1378	chr9	76770170	76770171	-	13
chr9	84543691	84543940	+	15.7731	chr9:84543691:84543940:+_P1	Acsl3	25655	chr9	84543744	84543745	+	0
chr9	90993678	90993822	+	28.1934	chr9:90993678:90993822:+_P1	AABR07068214.1	8004	chr9	90993699	90993700	+	0
chr9	92619007	92619078	-	1.27058	chr9:92619007:92619078:-_P1	Sp110	2842	chr9	92618884	92618885	-	122
chr9	92675014	92675097	+	0.979521	chr9:92675014:92675097:+_P1	Sp100	5979	chr9	92674969	92674970	+	44
chr9	98139467	98139625	+	59.5997	chr9:98139467:98139625:+_P1	Prlh	26121	chr9	98139484	98139485	+	0
chr9	98394064	98394410	+	37.3505	chr9:98394064:98394410:+_P1	Ube2f	3716	chr9	98394083	98394084	+	0
chr9	98394064	98394410	+	37.3505	chr9:98394064:98394410:+_P1	Ube2f	3716	chr9	98394323	98394324	+	0
chr9	111559663	111559741	+	8.75972	chr9:111559663:111559741:+_P1	Fer	37294	chr9	111559694	111559695	+	0
chr9	112048748	112048931	-	77.287	chr9:112048748:112048931:-_P1	Pja2	21508	chr9	112048902	112048903	-	0
chr9	113873161	113873265	-	18.9691	chr9:113873161:113873265:-_P1	Ndufv2	26923	chr9	113873204	113873205	-	0
chr9	119349403	119349608	+	550.653	chr9:119349403:119349608:+_P1	Myom1	4230	chr9	119349733	119349734	+	125
chr9	119349964	119350072	+	18.4486	chr9:119349964:119350072:+_P1	Myom1	3766	chr9	119349733	119349734	+	230
chr9	119871477	119871740	+	5.02634	chr9:119871477:119871740:+_P1	Mettl4	1428	chr9	119871524	119871525	+	0
chrMT	3680	3737	-	0.559726	chrMT:3680:3737:-_P1	Mt-nd6	10322	chrMT	3830	3831	-	93
chrMT	4588	4964	-	7.00218	chrMT:4588:4964:-_P1	Mt-nd6	9095	chrMT	5077	5078	-	113
chrMT	6481	6566	-	0.509351	chrMT:6481:6566:-_P1	Mt-nd6	7493	chrMT	6932	6933	-	366
chrMT	15167	15299	-	4.34907	chrMT:15167:15299:-_P1	Mt-nd6	1106	chrMT	15414	15415	-	115
chrMT	15384	15635	+	9.2019	chrMT:15384:15635:+_P1	Mt-cyb	1248	chrMT	15279	15280	+	104
chrMT	15738	15756	+	0.542935	chrMT:15738:15756:+_P1	Mt-cyb	1602	chrMT	15279	15280	+	458
chrX	922437	922524	+	1.86389	chrX:922437:922524:+_P1	Zfp300	14393	chrX	922354	922355	+	82
chrX	1744995	1745158	-	7.5787	chrX:1744995:1745158:-_P1	Uba1	3294	chrX	1745131	1745132	-	0
chrX	1850420	1850487	-	0.985119	chrX:1850420:1850487:-_P1	Rgn	1516	chrX	1850555	1850556	-	68
chrX	11570137	11570228	+	3.05051	chrX:11570137:11570228:+_P1	Bcor	78759	chrX	11570154	11570155	+	0
chrX	11601069	11601092	+	0.906757	chrX:11601069:11601092:+_P1	Bcor	47895	chrX	11601057	11601058	+	11
chrX	16048354	16048510	+	3.19604	chrX:16048354:16048510:+_P1	Clcn5	2268	chrX	16048400	16048401	+	0
chrX	18483301	18483388	+	3.40314	chrX:18483301:18483388:+_P1	LOC681355	6207	chrX	18483338	18483339	+	0
chrX	23192030	23192123	-	28.4789	chrX:23192030:23192123:-_P1	Alas2	4689	chrX	23192082	23192083	-	0
chrX	24872468	24872803	+	21.5551	chrX:24872468:24872803:+_P1	Wwc3	18351	chrX	24872486	24872487	+	0
chrX	29562081	29562147	-	7.9873	chrX:29562081:29562147:-_P1	Trappc2	5471	chrX	29562148	29562149	-	1
chrX	29750850	29751016	-	17.7097	chrX:29750850:29751016:-_P1	Gemin8	74421	chrX	29751098	29751099	-	82
chrX	31781543	31781647	-	20.6203	chrX:31781543:31781647:-_P1	Asb9	1118	chrX	31781687	31781688	-	40
chrX	31852088	31852095	-	0.71645	chrX:31852088:31852095:-_P1	Vegfd	373	chrX	31852078	31852079	-	9
chrX	31976223	31976232	+	0.65488	chrX:31976223:31976232:+_P1	Bmx	8378	chrX	31976220	31976221	+	2
chrX	35536379	35536439	+	2.80423	chrX:35536379:35536439:+_P1	Cdkl5	62817	chrX	35536407	35536408	+	0
chrX	65559816	65559943	+	4.61215	chrX:65559816:65559943:+_P1	Heph	3177	chrX	65560078	65560079	+	135
chrX	71907005	71907110	+	2.18853	chrX:71907005:71907110:+_P1	Pin4	97370	chrX	71907041	71907042	+	0
chrX	104495312	104495473	-	38.6547	chrX:104495312:104495473:-_P1	Pcdh19	1555	chrX	104495388	104495389	-	0
chrX	105401729	105401782	+	1.03549	chrX:105401729:105401782:+_P1	Rpl36al	1083	chrX	105401751	105401752	+	0
chrX	105417588	105417696	+	60.2042	chrX:105417588:105417696:+_P1	Hnrnph2	1587	chrX	105417628	105417629	+	0
chrX	111917515	111917597	-	8.56941	chrX:111917515:111917597:-_P1	AABR07040840.1	25150	chrX	111917799	111917800	-	202
chrX	111943951	111944011	-	1.36014	chrX:111943951:111944011:-_P1	AABR07040840.1	1202	chrX	111943975	111943976	-	0
chrX	112328872	112328929	+	10.59	chrX:112328872:112328929:+_P1	AABR07040855.1	17621	chrX	112328894	112328895	+	0
chrX	121734926	121735103	-	10.3046	chrX:121734926:121735103:-_P1	Klhl13	3383	chrX	121735025	121735026	-	0
chrX	142571022	142571092	-	9.85678	chrX:142571022:142571092:-_P1	Fgf13	322653	chrX	142570763	142570764	-	258
chrX	143525671	143525727	-	3.95167	chrX:143525671:143525727:-_P1	LOC688842	32792	chrX	143525715	143525716	-	0
chrX	143526182	143526240	-	0.582115	chrX:143526182:143526240:-_P1	LOC688842	32279	chrX	143525715	143525716	-	466
chrX	152989116	152989139	+	0.319044	chrX:152989116:152989139:+_P1	Zfp185	9875	chrX	152989149	152989150	+	10
chrX	156273991	156274080	-	9.69446	chrX:156273991:156274080:-_P1	Ikbkg	3243	chrX	156274065	156274066	-	0
chrX	156650271	156650410	+	30.0069	chrX:156650271:156650410:+_P1	Mecp2	5548	chrX	156650433	156650434	+	23
chrX	156901234	156901306	+	0.660477	chrX:156901234:156901306:+_P1	L1cam	8605	chrX	156901269	156901270	+	0
chrX	157720940	157720975	-	0.682866	chrX:157720940:157720975:-_P1	AABR07042471.1	92703	chrX	157720960	157720961	-	0
