# Supplementary material for: Cap analysis of gene expression reveals alternative promoter usage in a rat model of hypertension
Source: Life Sci Alliance. 2022 Jan 7;5(4):e202101234. doi: 10.26508/lsa.202101234 (PMC8742872; doi:10.26508/lsa.202101234)
Supplement: Supplementary file 6 [file LSA-2021-01234_SdataF4.xlsx]

## Sheet: SourceDataForFigure4B
Strain	Count	AlleleFrequency	Allele
F1	8	0.0869565	BN
F1	84	0.913043	SHR
F1	14	0.14433	BN
F1	83	0.85567	SHR
F1	5	0.0877193	BN
F1	52	0.912281	SHR
F1	7	0.0736842	BN
F1	88	0.926316	SHR
F1	6	0.0789474	BN
F1	70	0.921053	SHR
F1	5	0.0892857	BN
F1	51	0.910714	SHR
F1	10	0.114943	BN
F1	77	0.885057	SHR
F1	3	0.0526316	BN
F1	54	0.947368	SHR
F1	7	0.102941	BN
F1	61	0.897059	SHR
F1	17	0.123188	BN
F1	121	0.876812	SHR
F1	9	0.0743802	BN
F1	112	0.92562	SHR
F1	7	0.0933333	BN
F1	68	0.906667	SHR

## Sheet: SourceDataForFigure4C
Strain	SNP	Allele	AllelicRatio	Tissue
HXB_01	N	BN	0	LV
HXB_02	Y	SHR	0.0118343	LV
HXB_03	N	BN	0	LV
HXB_04	Y	SHR	0.035	LV
HXB_05	Y	SHR	0.0625	LV
HXB_07	N	BN	0.00434783	LV
HXB_10	N	BN	0	LV
HXB_13	N	BN	0.00641026	LV
HXB_15	N	BN	0	LV
HXB_17	Y	SHR	0.0431034	LV
HXB_18	N	BN	0	LV
HXB_20	N	BN	0	LV
HXB_21	Y	SHR	0.034965	LV
HXB_22	N	BN	0	LV
HXB_23	Y	SHR	0.0414201	LV
HXB_24	Y	SHR	0.025641	LV
HXB_25	N	BN	0	LV
HXB_27	Y	SHR	0.0596026	LV
HXB_29	Y	SHR	0.0416667	LV
HXB_31	N	BN	0	LV
BXH_02	N	BN	0.00869565	LV
BXH_03	Y	SHR	0.0381679	LV
BXH_05	Y	SHR	0.057377	LV
BXH_06	Y	SHR	0.0377358	LV
BXH_08	N	BN	0	LV
BXH_09	N	BN	0.0186916	LV
BXH_10	Y	SHR	0.057971	LV
BXH_11	Y	SHR	0.0538462	LV
BXH_12	Y	SHR	0.0466667	LV
BXH_13	Y	SHR	0.0347826	LV
HXB_01	N	BN	0	Liver
HXB_02	Y	SHR	0.0777778	Liver
HXB_03	N	BN	0.013986	Liver
HXB_04	Y	SHR	0.11828	Liver
HXB_05	Y	SHR	0.0533981	Liver
HXB_07	N	BN	0.00938967	Liver
HXB_10	N	BN	0.00738007	Liver
HXB_13	N	BN	0.0052356	Liver
HXB_15	N	BN	0.00925926	Liver
HXB_17	Y	SHR	0.102564	Liver
HXB_18	N	BN	0.00485437	Liver
HXB_20	N	BN	0.012987	Liver
HXB_21	Y	SHR	0.0545455	Liver
HXB_22	N	BN	0.0208333	Liver
HXB_23	Y	SHR	0.0534351	Liver
HXB_24	Y	SHR	0.0666667	Liver
HXB_25	N	BN	0.016129	Liver
HXB_27	Y	SHR	0.0273973	Liver
HXB_29	Y	SHR	0.0228571	Liver
HXB_31	N	BN	0	Liver
BXH_02	N	BN	0	Liver
BXH_03	Y	SHR	0.0555556	Liver
BXH_05	Y	SHR	0.0461538	Liver
BXH_06	Y	SHR	0.0384615	Liver
BXH_08	N	BN	0.0232558	Liver
BXH_09	N	BN	0.0178571	Liver
BXH_10	Y	SHR	0.10219	Liver
BXH_11	Y	SHR	0.0666667	Liver
BXH_12	Y	SHR	0.0942408	Liver
BXH_13	Y	SHR	0.052356	Liver

## Sheet: SourceDataForFigure4D
Strain	SNP	Allele	Messurement	Phenotype
HXB_01	N	BN	0.147	Ins15
HXB_02	Y	SHR	0.336	Ins15
HXB_03	N	BN	0.104	Ins15
HXB_04	Y	SHR	0.237	Ins15
HXB_05	Y	SHR	0.283	Ins15
HXB_10	N	BN	0.206	Ins15
HXB_13	N	BN	0.308	Ins15
HXB_15	N	BN	0.243	Ins15
HXB_17	Y	SHR	0.326	Ins15
HXB_18	N	BN	0.246	Ins15
HXB_23	Y	SHR	0.179	Ins15
HXB_24	Y	SHR	0.424	Ins15
HXB_25	N	BN	0.245	Ins15
HXB_27	Y	SHR	0.137	Ins15
HXB_29	Y	SHR	0.684	Ins15
HXB_31	N	BN	0.346	Ins15
BXH_02	N	BN	0.205	Ins15
BXH_03	Y	SHR	0.378	Ins15
BXH_05	Y	SHR	0.28	Ins15
BXH_08	N	BN	0.149	Ins15
BXH_09	N	BN	0.144	Ins15
BXH_11	Y	SHR	0.173	Ins15
BXH_12	Y	SHR	0.311	Ins15
BXH_13	Y	SHR	0.706	Ins15
HXB_01	N	BN	155	SBP
HXB_02	Y	SHR	168	SBP
HXB_03	N	BN	163	SBP
HXB_04	Y	SHR	195	SBP
HXB_05	Y	SHR	163	SBP
HXB_07	N	BN	151	SBP
HXB_10	N	BN	162	SBP
HXB_13	N	BN	160	SBP
HXB_15	N	BN	141	SBP
HXB_17	Y	SHR	179	SBP
HXB_18	N	BN	145	SBP
HXB_20	N	BN	139	SBP
HXB_21	Y	SHR	188	SBP
HXB_22	N	BN	145	SBP
HXB_23	Y	SHR	165	SBP
HXB_24	Y	SHR	150	SBP
HXB_25	N	BN	148	SBP
HXB_27	Y	SHR	153	SBP
HXB_29	Y	SHR	145	SBP
HXB_31	N	BN	158	SBP
BXH_02	N	BN	145	SBP
BXH_03	Y	SHR	154	SBP
BXH_05	Y	SHR	154	SBP
BXH_06	Y	SHR	151	SBP
BXH_08	N	BN	130	SBP
BXH_09	N	BN	157	SBP
BXH_10	Y	SHR	150	SBP
BXH_11	Y	SHR	167	SBP
BXH_12	Y	SHR	165	SBP
BXH_13	Y	SHR	161	SBP
HXB_01	N	BN	103	DBP
HXB_02	Y	SHR	122	DBP
HXB_03	N	BN	115	DBP
HXB_04	Y	SHR	123	DBP
HXB_05	Y	SHR	112	DBP
HXB_07	N	BN	96	DBP
HXB_10	N	BN	120	DBP
HXB_13	N	BN	109	DBP
HXB_15	N	BN	97	DBP
HXB_17	Y	SHR	123	DBP
HXB_18	N	BN	101	DBP
HXB_20	N	BN	104	DBP
HXB_21	Y	SHR	122	DBP
HXB_22	N	BN	99	DBP
HXB_23	Y	SHR	117	DBP
HXB_24	Y	SHR	102	DBP
HXB_25	N	BN	102	DBP
HXB_27	Y	SHR	99	DBP
HXB_29	Y	SHR	110	DBP
HXB_31	N	BN	98	DBP
BXH_02	N	BN	107	DBP
BXH_03	Y	SHR	107	DBP
BXH_05	Y	SHR	117	DBP
BXH_06	Y	SHR	111	DBP
BXH_08	N	BN	98	DBP
BXH_09	N	BN	115	DBP
BXH_10	Y	SHR	103	DBP
BXH_11	Y	SHR	119	DBP
BXH_12	Y	SHR	125	DBP
BXH_13	Y	SHR	125	DBP
